# Supplementary material for: Discrepancies in reporting of study design and analysis methods between protocols and reports of interrupted time series (ITS) studies: a methodological study
Source: Research Square preprint supplement (doi:10.21203/rs.3.rs-8612197/v1), 2026-01-24
Supplement: Supplementary file 1 [file 46ff67e18ce02c37aaf79fcf.pdf]

## Additional File 2. Deviations from protocol

| Original plan                                                                                                                                                                                                                                                      | Revised plan                                                                                                                                                                                                                                                                                                                                                                            | Reason for modification                                                                                                                                                                                            |
|--------------------------------------------------------------------------------------------------------------------------------------------------------------------------------------------------------------------------------------------------------------------|-----------------------------------------------------------------------------------------------------------------------------------------------------------------------------------------------------------------------------------------------------------------------------------------------------------------------------------------------------------------------------------------|--------------------------------------------------------------------------------------------------------------------------------------------------------------------------------------------------------------------|
| We planned to search for published protocols of interrupted time series (ITS) studies indexed in three bibliographic databases (PubMed, MEDLINE, and Embase via Ovid) and in the JMIR Research Protocols.                                                          | We included additional bibliographic databases (e.g. CINAHL, CENTRAL, Web of Science) and other sources (e.g. open access repositories, grey literature databases, trial registries), adding to a total of 22 sources.                                                                                                                                                                  | This maximises the likelihood of capturing all potential ITS study protocols, since the search filter may not capture protocols that do not have the term “interrupted time series” in their titles and abstracts. |
| We planned to search for corresponding report(s) of the results in Ovid MEDLINE and Embase, trial registration sites, and using forward citation searching tools, such as Web of Science’s Cited Reference Search.                                                 | We included three more sources for searching: PubMed, ConnectedPapers.com and Google Scholar.                                                                                                                                                                                                                                                                                           | This maximises the likelihood of capturing all potential ITS results reports.                                                                                                                                      |
| We planned to have one reviewer (PYN) extract the data for all studies and a second reviewer (JEM, EK, MJP, or SLT) independently extracting data for a random sample of 10% of the studies after the pilot. This also applied to the assessment of discrepancies. | We had two teams of reviewers assess two groups of items: PYN and MJP for items related to study design, and EK and SLT for items related to the characteristics/modelling of the time series and statistical methods. For each item, the team of reviewers assessed 100% of the studies. JEM served as the arbitrator when the two reviewers could not reach consensus via discussion. | This improved consistency in applying the decision rules, as the same team of authors assessed all studies for each item.                                                                                          |

## **Additional File 3. Key definitions and eligibility criteria used in screening**

### **3.1. Eligible protocols of ITS studies**

Eligible protocols include protocols and statistical analysis plans of ITS studies.

We defined an ITS study based on the following criteria:

- (a) Characteristics of the time series: The study involved a time series with the following features: (i) there were at least two segments separated by a clearly defined interruption (i.e. an intervention or an exposure), (ii) there were at least three data points for at least two of the segments, and (iii) each data point represented a summary statistic (e.g., mean or rate) of individual observations collected from a group of individuals (e.g., within a country, state, hospital, or other unit) within a period of time (e.g., weekly or monthly);
- (b) Intention to undertake an ITS analysis: Indication of such an intention includes: (a) specifying "interrupted time series" in the title, abstract or the methods section of the article, or (b) describing statistical methods consistent with ITS analysis methods, such as segmented regression, or an autoregressive integrated moving average (ARIMA) model in the presence of an interruption in the time series.

If the design criteria for the time series were met but the authors only planned to undertake non-ITS analyses (e.g., simply comparing the pre- and post-interruption means without modelling time trend), the protocols were excluded. Alternatively, if the authors expressed an intention to undertake an ITS analysis but the time series failed any of the design criteria (e.g., having fewer than three data points for one segment), the protocols were also excluded. If there was insufficient information about the characteristics of the time series, we only assessed criterion (b), with studies meeting this criterion being included.

Studies that planned to conduct ITS analysis alongside other types of analyses (e.g., qualitative analysis or cost-effectiveness modelling) were eligible. Both controlled and uncontrolled ITS studies were eligible. Studies that used the ITS design to examine the effects of an intervention on individuals (e.g. using multilevel model with a random slope term for time at the participant level) were ineligible. We excluded conference abstracts and protocols not written in English.

### **3.2. Primary ITS research questions**

For each protocol, we identified the "primary ITS research question" i.e. the ITS research question reported by the authors as the "primary analysis", "primary objective" or "primary research aim"; or alternatively, the first research question specified under the Research Aims/Objectives or Methods section that was planned to be analysed using ITS analysis methods. If a protocol included both an ITS analysis and other types of analyses (e.g., qualitative analysis or cost-effectiveness modelling), we only considered the ITS analysis for the primary ITS research question.

To form the primary ITS research question, we extracted information about the following elements: the population/setting (P), the interruption group(s) (I), and the comparator group(s) (C). For the purpose of our study, we use the term “group” to refer to interventions or exposures that occur in different time periods or segments. If there were multiple interventions investigated, the first mentioned intervention was selected for primary ITS research question. We did not include the outcome elements (O) in the primary ITS research question, because our interest lay in examining outcome/result reporting bias. The primary ITS research question did not have to include all of the abovementioned elements.

We constructed the primary ITS research question using the reported elements: *What is the effect of [intervention], implemented at [setting / location], compared to [comparator periods / comparison sites / comparison group]?*

Case study: Suppose an ITS has three segments. The first segment is the pre-implementation period; the second is the implementation period and the third is the post-implementation period. The intervention is evaluated in two populations (population 1 and 2).

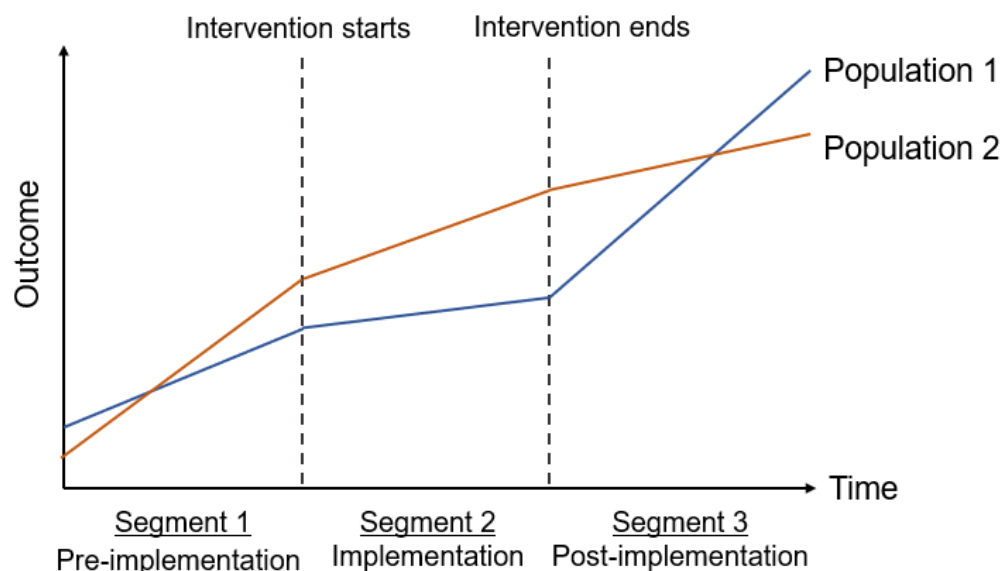

If the authors stated “Our primary aim is to examine the effect of the implementation period and that of the post-implementation periods in population 1”, then we constructed the primary ITS research questions to be:

- What is the effect of implementation period in population 1 compared with pre-implementation?
- What is the effect of post-implementation period in population 1 compared with pre-implementation?
- What is the effect of post-implementation period in population 1 compared with implementation?

If the authors stated “Our primary aim is to investigate the change in outcome following the commencement of the intervention”, we would combine the implementation and post-implementation periods as one segment, and consider any results pertaining to both population 1 and 2 (since the population was not stated in the aim). We constructed the primary ITS research questions to be:

- What is the effect of the implementation and post-implementation periods in population 1, compared with pre-implementation?
- What is the effect of the implementation and post-implementation periods in population 2, compared with pre-implementation?

### **3.3. Eligible reports of ITS results**

“Report(s) of the results” were defined as any peer-reviewed report that met the following criteria:

- (a) The report addressed the same primary ITS research question(s) as the protocol; AND
- (b) The report either (1) acknowledged and cited the original protocol, or (2) matched the original protocol in at least one of the following details: funding or grant number, ethics application number, trial registration number, unique name or acronyms of the intervention.

We included results reports regardless of the outcomes specified in the protocol. For example, if the authors stated in the protocol that they aimed to evaluate an intervention designed to reduce cardiovascular adverse outcomes among hypertension patients, when screening the potential results report, we checked if the intervention was designed to reduce cardiovascular adverse outcomes, but we did not exclude a results report if they only reported other outcomes (e.g., quality of life) that were not specified in the protocol.

Exclusion criteria: We excluded conference abstracts and short reports, and reports not written in English. Methods papers in which data from the ITS was used, for example, to demonstrate the impact of using different statistical analysis methods, were ineligible.

If we were uncertain whether a report was indeed the results of research carried out under a protocol (e.g., when the primary ITS research question was the same but there was no citation of the protocol nor any of the abovementioned detail), we contacted the corresponding author of the protocol to clarify. If the author did not respond after two weeks, the team discussed and reached a consensus on the eligibility of the results report.

### **3.4. Eligible results**

We defined an “eligible result” as any measure of a difference between the two segments of interest; for example, the difference between the pre-intervention segment and post-intervention segment. An eligible result could be either (1) a numerical result: an effect estimate with/without the 95% confidence interval or standard error, or a p-value; or (2) a

qualitative statement about the change between two time segments (e.g., "There is a statistically significant increase in the level of [outcome] between the two time periods"). Presentation of only summary statistics within each period (e.g., means) were ineligible.

An eligible result could be from an analysis that was or was not an ITS analysis (Section 5.1 for further details on what was considered an ITS analysis) or for an outcome that was not specified in the protocol, as long as it addressed the primary ITS research question(s).

## **Additional File 4. Creating the database of ITS study protocols and their results reports**

### **4.1 Creating a database of ITS study protocols**

#### **4.1.1 Literature search for protocols**

We searched eight bibliographic databases, five trial registries, four open-source repositories, two grey literature databases, one pre-print server and two open access journals that publish protocols. For MEDLINE, PubMed and Embase, we used a search filter designed to locate ITS studies with high sensitivity (16), and added keywords for protocols. The last search was on 12 January 2023, including all protocols from inception date until 31 December 2022.

#### **4.1.2 Screening of protocols**

One author (PYN) screened all titles and abstracts. A 10% random sample of abstracts deemed ineligible and all abstracts deemed eligible by PYN were independently screened by one of JEM, SLT, EK, or MJP. All full text articles were independently screened by two authors. Discrepancies were resolved through discussion between the screening authors or through team discussions.

#### **4.1.3 Identifying the primary ITS research question(s)**

For each protocol, two authors (PYN and MJP) independently identified the “primary ITS research question(s)”; the ITS research question(s) reported by the authors as “primary”, or alternatively the first reported in the protocol. We used the primary ITS research question(s) to determine whether the study had been published (see Section 3.2).

### **4.2 Identifying corresponding results reports of ITS studies**

#### **4.2.1 Literature search for results reports**

For each protocol, we searched in PubMed, Ovid MEDLINE and Embase for corresponding results reports. The search strategy was tailored for each protocol, combining two elements: (a) identifiers of the study such as study’s name or acronym, description of intervention, study registration number, etc. AND (b) either the first author, last author or the corresponding author. We additionally searched clinical trial registries (if applicable), Google Scholar and a forward citation tool. The initial search was conducted in January 2023 and three subsequent searches were conducted, once every 6 months, for all results reports published up to 30 June 2023.

#### **4.2.2 Screening for eligible results reports**

One author (PYN) screened the full text of all retrieved reports. 50% of full text reports deemed ineligible and 100% full text reports deemed eligible by PYN were independently screened by one of JEM/SLT/EK/MJP.

During screening, we first checked that the result report addressed the primary ITS research question(s) that we had identified in its corresponding protocol. In determining this, we considered the population/setting, interruption group(s) and the comparator group(s) elements of the research question(s). In addition, we checked whether the report cited the original protocol, or could be linked to the protocol via details such as trial registration

number. If we were unsure, we contacted the corresponding authors to clarify. If the authors did not respond, a decision was reached via team discussion.

## Additional File 5. Data extraction form

| Question                                                                                                                                                                                                                                                                                                                                                  | Options                                                                                                                                                                                                                                                                                                |    |                      |   |                          |   |                                                 |   |          |     |                   |
|-----------------------------------------------------------------------------------------------------------------------------------------------------------------------------------------------------------------------------------------------------------------------------------------------------------------------------------------------------------|--------------------------------------------------------------------------------------------------------------------------------------------------------------------------------------------------------------------------------------------------------------------------------------------------------|----|----------------------|---|--------------------------|---|-------------------------------------------------|---|----------|-----|-------------------|
| <b>Information from protocols – Basic information</b>                                                                                                                                                                                                                                                                                                     |                                                                                                                                                                                                                                                                                                        |    |                      |   |                          |   |                                                 |   |          |     |                   |
| <b>Title of protocol</b>                                                                                                                                                                                                                                                                                                                                  | text                                                                                                                                                                                                                                                                                                   |    |                      |   |                          |   |                                                 |   |          |     |                   |
| <b>What is the name of the publishing journal?</b>                                                                                                                                                                                                                                                                                                        | text                                                                                                                                                                                                                                                                                                   |    |                      |   |                          |   |                                                 |   |          |     |                   |
| <b>Does the protocol describe other planned analyses in addition to the ITS analysis (e.g. interviews, a pre-post analysis, cost-effectiveness study)</b><br>The protocol often refers to these as multiple objectives, aims, sub-studies, or work packages (WPs).                                                                                        | multiple-choice<br><table border="1"> <tr> <td>1</td><td>Yes</td></tr> <tr> <td>0</td><td>No</td></tr> </table>                                                                                                                                                                                        | 1  | Yes                  | 0 | No                       |   |                                                 |   |          |     |                   |
| 1                                                                                                                                                                                                                                                                                                                                                         | Yes                                                                                                                                                                                                                                                                                                    |    |                      |   |                          |   |                                                 |   |          |     |                   |
| 0                                                                                                                                                                                                                                                                                                                                                         | No                                                                                                                                                                                                                                                                                                     |    |                      |   |                          |   |                                                 |   |          |     |                   |
| <b>What is the source of funding?</b><br>In-kind materials are also considered funding, and should be described in subsequent questions about the role of the funder.                                                                                                                                                                                     | checkbox<br><table border="1"> <tr> <td>99</td><td>Cannot be determined</td></tr> <tr> <td>0</td><td>No funding</td></tr> <tr> <td>1</td><td>Non-industry (non-profit, academic, government)</td></tr> <tr> <td>2</td><td>Industry</td></tr> <tr> <td>999</td><td>Other [elaborate]</td></tr> </table> | 99 | Cannot be determined | 0 | No funding               | 1 | Non-industry (non-profit, academic, government) | 2 | Industry | 999 | Other [elaborate] |
| 99                                                                                                                                                                                                                                                                                                                                                        | Cannot be determined                                                                                                                                                                                                                                                                                   |    |                      |   |                          |   |                                                 |   |          |     |                   |
| 0                                                                                                                                                                                                                                                                                                                                                         | No funding                                                                                                                                                                                                                                                                                             |    |                      |   |                          |   |                                                 |   |          |     |                   |
| 1                                                                                                                                                                                                                                                                                                                                                         | Non-industry (non-profit, academic, government)                                                                                                                                                                                                                                                        |    |                      |   |                          |   |                                                 |   |          |     |                   |
| 2                                                                                                                                                                                                                                                                                                                                                         | Industry                                                                                                                                                                                                                                                                                               |    |                      |   |                          |   |                                                 |   |          |     |                   |
| 999                                                                                                                                                                                                                                                                                                                                                       | Other [elaborate]                                                                                                                                                                                                                                                                                      |    |                      |   |                          |   |                                                 |   |          |     |                   |
| <b>Briefly describe the intervention(s) or exposure(s) that constitute the interruption points.</b>                                                                                                                                                                                                                                                       | text                                                                                                                                                                                                                                                                                                   |    |                      |   |                          |   |                                                 |   |          |     |                   |
| <b>What is the nature of interruption?</b> <ul style="list-style-type: none"> <li>Natural events: e.g. disease outbreaks, weather-related or geological events (floods, earthquakes)</li> <li>Unplanned human-made events: unintended or unforeseen human-driven events e.g. economic recession, environmental disasters, industrial accidents</li> </ul> | multiple-choice<br><table border="1"> <tr> <td>99</td><td>Cannot be determined</td></tr> <tr> <td>1</td><td>Exposure: Natural events</td></tr> <tr> <td>2</td><td>Exposure: Unplanned human-made events</td></tr> </table>                                                                             | 99 | Cannot be determined | 1 | Exposure: Natural events | 2 | Exposure: Unplanned human-made events           |   |          |     |                   |
| 99                                                                                                                                                                                                                                                                                                                                                        | Cannot be determined                                                                                                                                                                                                                                                                                   |    |                      |   |                          |   |                                                 |   |          |     |                   |
| 1                                                                                                                                                                                                                                                                                                                                                         | Exposure: Natural events                                                                                                                                                                                                                                                                               |    |                      |   |                          |   |                                                 |   |          |     |                   |
| 2                                                                                                                                                                                                                                                                                                                                                         | Exposure: Unplanned human-made events                                                                                                                                                                                                                                                                  |    |                      |   |                          |   |                                                 |   |          |     |                   |



| Question                                                                                                                                                                                                                                                                                                                                                                                                                                                                                                                                                                                                                                                                                                                                                                                                                                                                                                                                                                                                                                                     | Options                                                                                                                                                                                                                                                                                                                                                                                                                                                                           |    |                                                     |   |                                           |   |                                           |   |                                               |   |                                           |     |                   |
|--------------------------------------------------------------------------------------------------------------------------------------------------------------------------------------------------------------------------------------------------------------------------------------------------------------------------------------------------------------------------------------------------------------------------------------------------------------------------------------------------------------------------------------------------------------------------------------------------------------------------------------------------------------------------------------------------------------------------------------------------------------------------------------------------------------------------------------------------------------------------------------------------------------------------------------------------------------------------------------------------------------------------------------------------------------|-----------------------------------------------------------------------------------------------------------------------------------------------------------------------------------------------------------------------------------------------------------------------------------------------------------------------------------------------------------------------------------------------------------------------------------------------------------------------------------|----|-----------------------------------------------------|---|-------------------------------------------|---|-------------------------------------------|---|-----------------------------------------------|---|-------------------------------------------|-----|-------------------|
| <ul style="list-style-type: none"> <li>Practice change in a clinical setting: a new or modified clinical practice, treatment, care model/pathway, etc. This also includes strategies to facilitate such implementation (e.g. facilitators, education and training).</li> <li>Health system interventions: interventions involving systemic changes at multiple levels e.g. health system strengthening, workforce changes, complex interventions involving multiple stakeholders</li> <li>Policy and regulatory changes: modifications in laws, national guidelines, or health system regulations e.g. taxation, lockdowns, national vaccination programmes</li> <li>Social and economic interventions: initiatives that extend beyond healthcare, addressing broader social and economic determinants of well-being e.g. cash grants, microfinancing, health insurance model</li> <li>Environmental interventions: modifications to the living and natural environment to influence public health e.g. mosquito control programs, urban planning</li> </ul> | <table border="1"> <tr> <td>3</td> <td>Intervention: Practice change in a clinical setting</td> </tr> <tr> <td>4</td> <td>Intervention: Health system interventions</td> </tr> <tr> <td>5</td> <td>Intervention: Policy &amp; regulatory changes</td> </tr> <tr> <td>6</td> <td>Intervention: Social &amp; economic interventions</td> </tr> <tr> <td>7</td> <td>Intervention: Environmental interventions</td> </tr> <tr> <td>999</td> <td>Other [elaborate]</td> </tr> </table> | 3  | Intervention: Practice change in a clinical setting | 4 | Intervention: Health system interventions | 5 | Intervention: Policy & regulatory changes | 6 | Intervention: Social & economic interventions | 7 | Intervention: Environmental interventions | 999 | Other [elaborate] |
| 3                                                                                                                                                                                                                                                                                                                                                                                                                                                                                                                                                                                                                                                                                                                                                                                                                                                                                                                                                                                                                                                            | Intervention: Practice change in a clinical setting                                                                                                                                                                                                                                                                                                                                                                                                                               |    |                                                     |   |                                           |   |                                           |   |                                               |   |                                           |     |                   |
| 4                                                                                                                                                                                                                                                                                                                                                                                                                                                                                                                                                                                                                                                                                                                                                                                                                                                                                                                                                                                                                                                            | Intervention: Health system interventions                                                                                                                                                                                                                                                                                                                                                                                                                                         |    |                                                     |   |                                           |   |                                           |   |                                               |   |                                           |     |                   |
| 5                                                                                                                                                                                                                                                                                                                                                                                                                                                                                                                                                                                                                                                                                                                                                                                                                                                                                                                                                                                                                                                            | Intervention: Policy & regulatory changes                                                                                                                                                                                                                                                                                                                                                                                                                                         |    |                                                     |   |                                           |   |                                           |   |                                               |   |                                           |     |                   |
| 6                                                                                                                                                                                                                                                                                                                                                                                                                                                                                                                                                                                                                                                                                                                                                                                                                                                                                                                                                                                                                                                            | Intervention: Social & economic interventions                                                                                                                                                                                                                                                                                                                                                                                                                                     |    |                                                     |   |                                           |   |                                           |   |                                               |   |                                           |     |                   |
| 7                                                                                                                                                                                                                                                                                                                                                                                                                                                                                                                                                                                                                                                                                                                                                                                                                                                                                                                                                                                                                                                            | Intervention: Environmental interventions                                                                                                                                                                                                                                                                                                                                                                                                                                         |    |                                                     |   |                                           |   |                                           |   |                                               |   |                                           |     |                   |
| 999                                                                                                                                                                                                                                                                                                                                                                                                                                                                                                                                                                                                                                                                                                                                                                                                                                                                                                                                                                                                                                                          | Other [elaborate]                                                                                                                                                                                                                                                                                                                                                                                                                                                                 |    |                                                     |   |                                           |   |                                           |   |                                               |   |                                           |     |                   |
| <p><b>At which level will the intervention occur, or be delivered / implemented?</b></p> <ul style="list-style-type: none"> <li>Individual: The intervention is implemented in specific individuals without the intention to represent a geographical area.</li> <li>Unit-based or institutions: The intervention is implemented in one or more specific institutions, hospitals or departments within a hospital.</li> <li>Regional: The intervention is implemented in an entire district, state, province or region, or in a group of institutions purposely sampled to represent a region.</li> <li>National: The intervention is implemented in multiple districts/regions in a country, or the entire country, or in a group of institutions purposely sampled to represent a country.</li> <li>Multinational: The intervention is implemented in multiple countries.</li> </ul>                                                                                                                                                                       | <p>multiple-choice</p> <table border="1"> <tr> <td>99</td> <td>Cannot be determined</td> </tr> <tr> <td>1</td> <td>Individual</td> </tr> <tr> <td>2</td> <td>Unit-based or institutional</td> </tr> <tr> <td>3</td> <td>Regional</td> </tr> <tr> <td>4</td> <td>National</td> </tr> <tr> <td>5</td> <td>Multinational</td> </tr> </table>                                                                                                                                         | 99 | Cannot be determined                                | 1 | Individual                                | 2 | Unit-based or institutional               | 3 | Regional                                      | 4 | National                                  | 5   | Multinational     |
| 99                                                                                                                                                                                                                                                                                                                                                                                                                                                                                                                                                                                                                                                                                                                                                                                                                                                                                                                                                                                                                                                           | Cannot be determined                                                                                                                                                                                                                                                                                                                                                                                                                                                              |    |                                                     |   |                                           |   |                                           |   |                                               |   |                                           |     |                   |
| 1                                                                                                                                                                                                                                                                                                                                                                                                                                                                                                                                                                                                                                                                                                                                                                                                                                                                                                                                                                                                                                                            | Individual                                                                                                                                                                                                                                                                                                                                                                                                                                                                        |    |                                                     |   |                                           |   |                                           |   |                                               |   |                                           |     |                   |
| 2                                                                                                                                                                                                                                                                                                                                                                                                                                                                                                                                                                                                                                                                                                                                                                                                                                                                                                                                                                                                                                                            | Unit-based or institutional                                                                                                                                                                                                                                                                                                                                                                                                                                                       |    |                                                     |   |                                           |   |                                           |   |                                               |   |                                           |     |                   |
| 3                                                                                                                                                                                                                                                                                                                                                                                                                                                                                                                                                                                                                                                                                                                                                                                                                                                                                                                                                                                                                                                            | Regional                                                                                                                                                                                                                                                                                                                                                                                                                                                                          |    |                                                     |   |                                           |   |                                           |   |                                               |   |                                           |     |                   |
| 4                                                                                                                                                                                                                                                                                                                                                                                                                                                                                                                                                                                                                                                                                                                                                                                                                                                                                                                                                                                                                                                            | National                                                                                                                                                                                                                                                                                                                                                                                                                                                                          |    |                                                     |   |                                           |   |                                           |   |                                               |   |                                           |     |                   |
| 5                                                                                                                                                                                                                                                                                                                                                                                                                                                                                                                                                                                                                                                                                                                                                                                                                                                                                                                                                                                                                                                            | Multinational                                                                                                                                                                                                                                                                                                                                                                                                                                                                     |    |                                                     |   |                                           |   |                                           |   |                                               |   |                                           |     |                   |

| Question                                                                                                                                                                                                                                                                                                                                                                                                                                                                                                                                                                                                                                                                                                                                                                                                                                                                           | Options                                                                                                                                                                                                                                                                                                                        |    |                      |   |                                                                                                     |   |                                                                          |   |             |   |          |   |               |
|------------------------------------------------------------------------------------------------------------------------------------------------------------------------------------------------------------------------------------------------------------------------------------------------------------------------------------------------------------------------------------------------------------------------------------------------------------------------------------------------------------------------------------------------------------------------------------------------------------------------------------------------------------------------------------------------------------------------------------------------------------------------------------------------------------------------------------------------------------------------------------|--------------------------------------------------------------------------------------------------------------------------------------------------------------------------------------------------------------------------------------------------------------------------------------------------------------------------------|----|----------------------|---|-----------------------------------------------------------------------------------------------------|---|--------------------------------------------------------------------------|---|-------------|---|----------|---|---------------|
| <b>At which level will the effect of the interruption be assessed in this study?</b> <ul style="list-style-type: none"> <li>Individual: The intervention is implemented in specific individuals without the intention to represent a geographical area.</li> <li>Unit-based or institutions: The intervention is implemented in one or more specific institutions, hospitals or departments within a hospital.</li> <li>Regional: The intervention is implemented in an entire district, state, province or region, or in a group of institutions purposely sampled to represent a region.</li> <li>National: The intervention is implemented in multiple districts/regions in a country, or the entire country, or in a group of institutions purposely sampled to represent a country.</li> <li>Multinational: The intervention is implemented in multiple countries.</li> </ul> | multiple-choice <table border="1"> <tr> <td>99</td><td>Cannot be determined</td></tr> <tr> <td>1</td><td>Individual</td></tr> <tr> <td>2</td><td>Unit-based or institutional</td></tr> <tr> <td>3</td><td>Regional</td></tr> <tr> <td>4</td><td>National</td></tr> <tr> <td>5</td><td>Multinational</td></tr> </table>         | 99 | Cannot be determined | 1 | Individual                                                                                          | 2 | Unit-based or institutional                                              | 3 | Regional    | 4 | National | 5 | Multinational |
| 99                                                                                                                                                                                                                                                                                                                                                                                                                                                                                                                                                                                                                                                                                                                                                                                                                                                                                 | Cannot be determined                                                                                                                                                                                                                                                                                                           |    |                      |   |                                                                                                     |   |                                                                          |   |             |   |          |   |               |
| 1                                                                                                                                                                                                                                                                                                                                                                                                                                                                                                                                                                                                                                                                                                                                                                                                                                                                                  | Individual                                                                                                                                                                                                                                                                                                                     |    |                      |   |                                                                                                     |   |                                                                          |   |             |   |          |   |               |
| 2                                                                                                                                                                                                                                                                                                                                                                                                                                                                                                                                                                                                                                                                                                                                                                                                                                                                                  | Unit-based or institutional                                                                                                                                                                                                                                                                                                    |    |                      |   |                                                                                                     |   |                                                                          |   |             |   |          |   |               |
| 3                                                                                                                                                                                                                                                                                                                                                                                                                                                                                                                                                                                                                                                                                                                                                                                                                                                                                  | Regional                                                                                                                                                                                                                                                                                                                       |    |                      |   |                                                                                                     |   |                                                                          |   |             |   |          |   |               |
| 4                                                                                                                                                                                                                                                                                                                                                                                                                                                                                                                                                                                                                                                                                                                                                                                                                                                                                  | National                                                                                                                                                                                                                                                                                                                       |    |                      |   |                                                                                                     |   |                                                                          |   |             |   |          |   |               |
| 5                                                                                                                                                                                                                                                                                                                                                                                                                                                                                                                                                                                                                                                                                                                                                                                                                                                                                  | Multinational                                                                                                                                                                                                                                                                                                                  |    |                      |   |                                                                                                     |   |                                                                          |   |             |   |          |   |               |
| <b>What is the country where the study was implemented?</b>                                                                                                                                                                                                                                                                                                                                                                                                                                                                                                                                                                                                                                                                                                                                                                                                                        | text                                                                                                                                                                                                                                                                                                                           |    |                      |   |                                                                                                     |   |                                                                          |   |             |   |          |   |               |
| <b>Classify the country using the World Bank's income group</b>                                                                                                                                                                                                                                                                                                                                                                                                                                                                                                                                                                                                                                                                                                                                                                                                                    | checkbox <table border="1"> <tr> <td>1</td><td>Low-income</td></tr> <tr> <td>2</td><td>Lower-middle income</td></tr> <tr> <td>3</td><td>Upper-middle income</td></tr> <tr> <td>4</td><td>High-income</td></tr> </table>                                                                                                        | 1  | Low-income           | 2 | Lower-middle income                                                                                 | 3 | Upper-middle income                                                      | 4 | High-income |   |          |   |               |
| 1                                                                                                                                                                                                                                                                                                                                                                                                                                                                                                                                                                                                                                                                                                                                                                                                                                                                                  | Low-income                                                                                                                                                                                                                                                                                                                     |    |                      |   |                                                                                                     |   |                                                                          |   |             |   |          |   |               |
| 2                                                                                                                                                                                                                                                                                                                                                                                                                                                                                                                                                                                                                                                                                                                                                                                                                                                                                  | Lower-middle income                                                                                                                                                                                                                                                                                                            |    |                      |   |                                                                                                     |   |                                                                          |   |             |   |          |   |               |
| 3                                                                                                                                                                                                                                                                                                                                                                                                                                                                                                                                                                                                                                                                                                                                                                                                                                                                                  | Upper-middle income                                                                                                                                                                                                                                                                                                            |    |                      |   |                                                                                                     |   |                                                                          |   |             |   |          |   |               |
| 4                                                                                                                                                                                                                                                                                                                                                                                                                                                                                                                                                                                                                                                                                                                                                                                                                                                                                  | High-income                                                                                                                                                                                                                                                                                                                    |    |                      |   |                                                                                                     |   |                                                                          |   |             |   |          |   |               |
| <b>Is the data collected retrospectively, prospectively, or both?</b><br>Use your best judgment based on (1) the end date of the data collection period relative to the protocol's submission date, or if not available (2) the timing of the intervention, and (3) authors' words. If the intervention has not been conducted or is ongoing at the time of the protocol, select 'prospective'.                                                                                                                                                                                                                                                                                                                                                                                                                                                                                    | checkbox <table border="1"> <tr> <td>99</td><td>Cannot be determined</td></tr> <tr> <td>1</td><td>Retrospective: Data is already available or collected at the time of the submission of the protocol</td></tr> <tr> <td>2</td><td>Prospective: Data will be collected after the submission of the protocol</td></tr> </table> | 99 | Cannot be determined | 1 | Retrospective: Data is already available or collected at the time of the submission of the protocol | 2 | Prospective: Data will be collected after the submission of the protocol |   |             |   |          |   |               |
| 99                                                                                                                                                                                                                                                                                                                                                                                                                                                                                                                                                                                                                                                                                                                                                                                                                                                                                 | Cannot be determined                                                                                                                                                                                                                                                                                                           |    |                      |   |                                                                                                     |   |                                                                          |   |             |   |          |   |               |
| 1                                                                                                                                                                                                                                                                                                                                                                                                                                                                                                                                                                                                                                                                                                                                                                                                                                                                                  | Retrospective: Data is already available or collected at the time of the submission of the protocol                                                                                                                                                                                                                            |    |                      |   |                                                                                                     |   |                                                                          |   |             |   |          |   |               |
| 2                                                                                                                                                                                                                                                                                                                                                                                                                                                                                                                                                                                                                                                                                                                                                                                                                                                                                  | Prospective: Data will be collected after the submission of the protocol                                                                                                                                                                                                                                                       |    |                      |   |                                                                                                     |   |                                                                          |   |             |   |          |   |               |
| <b>Information from protocols – Study design and Analysis methods</b>                                                                                                                                                                                                                                                                                                                                                                                                                                                                                                                                                                                                                                                                                                                                                                                                              |                                                                                                                                                                                                                                                                                                                                |    |                      |   |                                                                                                     |   |                                                                          |   |             |   |          |   |               |
| <b>Summarise the primary research question(s) for the ITS analysis.</b>                                                                                                                                                                                                                                                                                                                                                                                                                                                                                                                                                                                                                                                                                                                                                                                                            | text                                                                                                                                                                                                                                                                                                                           |    |                      |   |                                                                                                     |   |                                                                          |   |             |   |          |   |               |

| Question                                                                                                                                                                                                                                                                                                                                                                                                                                                                                                                                                                                   | Options                                                                                                                                                                                                           |    |                      |   |                    |   |                       |
|--------------------------------------------------------------------------------------------------------------------------------------------------------------------------------------------------------------------------------------------------------------------------------------------------------------------------------------------------------------------------------------------------------------------------------------------------------------------------------------------------------------------------------------------------------------------------------------------|-------------------------------------------------------------------------------------------------------------------------------------------------------------------------------------------------------------------|----|----------------------|---|--------------------|---|-----------------------|
| <p>Examples</p> <ul style="list-style-type: none"> <li>• What are the effects of an antibiotic stewardship programme in a hospital aimed at reducing unnecessary antibiotic prescriptions, compared to no intervention?</li> <li>• What are the effects of a family planning intervention on pregnant women in intervention suburbs, compared to matched control suburbs?</li> </ul>                                                                                                                                                                                                       |                                                                                                                                                                                                                   |    |                      |   |                    |   |                       |
| <p><b>What were the eligibility criteria for participants/sites to be included in the ITS?</b></p> <p>Copy and paste from protocol or trial registry</p>                                                                                                                                                                                                                                                                                                                                                                                                                                   | text                                                                                                                                                                                                              |    |                      |   |                    |   |                       |
| <p><b>Describe the data source(s)</b></p> <p>Examples: name of data source, how it was collected (e.g. EHR, survey, audit reports) and any other important info</p>                                                                                                                                                                                                                                                                                                                                                                                                                        | text                                                                                                                                                                                                              |    |                      |   |                    |   |                       |
| <p><b>Is the intervention implemented at a specific time or over a period of time?</b></p>                                                                                                                                                                                                                                                                                                                                                                                                                                                                                                 | checkbox <table border="1"> <tbody> <tr> <td>99</td> <td>Cannot be determined</td> </tr> <tr> <td>1</td> <td>At a specific time</td> </tr> <tr> <td>2</td> <td>Over a period of time</td> </tr> </tbody> </table> | 99 | Cannot be determined | 1 | At a specific time | 2 | Over a period of time |
| 99                                                                                                                                                                                                                                                                                                                                                                                                                                                                                                                                                                                         | Cannot be determined                                                                                                                                                                                              |    |                      |   |                    |   |                       |
| 1                                                                                                                                                                                                                                                                                                                                                                                                                                                                                                                                                                                          | At a specific time                                                                                                                                                                                                |    |                      |   |                    |   |                       |
| 2                                                                                                                                                                                                                                                                                                                                                                                                                                                                                                                                                                                          | Over a period of time                                                                                                                                                                                             |    |                      |   |                    |   |                       |
| <p><b>Outline and describe all the segments in the time series</b></p> <p>Use S1, S2, S3, etc. to label the segments. For each segment, state their start / end time and number of data points.</p> <p>If there are multiple time series with unclear/overlapping time points (such as multiple sites with staggered rollout), describe one representative time series and add a note to highlight that there are other similar time series for multiple sites.</p> <p>Example:<br/> S1: Dec 2010-May 2011 (6 dp)<br/> S2: Jun 2011-May 2012 (12 dp)<br/> S3: Jun 2012-Dec 2012 (6 dp)</p> | text                                                                                                                                                                                                              |    |                      |   |                    |   |                       |

| Question                                                                                                                                                                                                                                                           | Options                                                                                                                                                                                                                                                                                                                                 |    |                      |   |                                     |   |                        |   |                                   |   |                                         |
|--------------------------------------------------------------------------------------------------------------------------------------------------------------------------------------------------------------------------------------------------------------------|-----------------------------------------------------------------------------------------------------------------------------------------------------------------------------------------------------------------------------------------------------------------------------------------------------------------------------------------|----|----------------------|---|-------------------------------------|---|------------------------|---|-----------------------------------|---|-----------------------------------------|
| <b>What is the number of segments?</b><br>Inclusive of intervention segment (S2) even when there is no data point for that segment                                                                                                                                 | numeric                                                                                                                                                                                                                                                                                                                                 |    |                      |   |                                     |   |                        |   |                                   |   |                                         |
| <b>Can the number of data point per segment be determined?</b>                                                                                                                                                                                                     | multiple-choice <table border="1"> <tr> <td>0</td><td>No</td></tr> <tr> <td>1</td><td>Yes - for some segments but not all</td></tr> <tr> <td>2</td><td>Yes - for all segments</td></tr> </table>                                                                                                                                        | 0  | No                   | 1 | Yes - for some segments but not all | 2 | Yes - for all segments |   |                                   |   |                                         |
| 0                                                                                                                                                                                                                                                                  | No                                                                                                                                                                                                                                                                                                                                      |    |                      |   |                                     |   |                        |   |                                   |   |                                         |
| 1                                                                                                                                                                                                                                                                  | Yes - for some segments but not all                                                                                                                                                                                                                                                                                                     |    |                      |   |                                     |   |                        |   |                                   |   |                                         |
| 2                                                                                                                                                                                                                                                                  | Yes - for all segments                                                                                                                                                                                                                                                                                                                  |    |                      |   |                                     |   |                        |   |                                   |   |                                         |
| <b>Can the start/end dates of each segment be determined?</b>                                                                                                                                                                                                      | multiple-choice <table border="1"> <tr> <td>0</td><td>No</td></tr> <tr> <td>1</td><td>Yes - for some segments but not all</td></tr> <tr> <td>2</td><td>Yes - for all segments</td></tr> </table>                                                                                                                                        | 0  | No                   | 1 | Yes - for some segments but not all | 2 | Yes - for all segments |   |                                   |   |                                         |
| 0                                                                                                                                                                                                                                                                  | No                                                                                                                                                                                                                                                                                                                                      |    |                      |   |                                     |   |                        |   |                                   |   |                                         |
| 1                                                                                                                                                                                                                                                                  | Yes - for some segments but not all                                                                                                                                                                                                                                                                                                     |    |                      |   |                                     |   |                        |   |                                   |   |                                         |
| 2                                                                                                                                                                                                                                                                  | Yes - for all segments                                                                                                                                                                                                                                                                                                                  |    |                      |   |                                     |   |                        |   |                                   |   |                                         |
| <b>What is the number of data points in the time series?</b><br>Hierarchy: no. of data points based on the length of data collected > no. of data points used in sample size calculation.                                                                          | text                                                                                                                                                                                                                                                                                                                                    |    |                      |   |                                     |   |                        |   |                                   |   |                                         |
| <b>Describe the impact model used to fit the time series</b><br>Copy and paste all relevant descriptions of the model from the article (note page no.).<br>You should also indicate any other important details that are not captured in the subsequent questions. | text                                                                                                                                                                                                                                                                                                                                    |    |                      |   |                                     |   |                        |   |                                   |   |                                         |
| <b>How is the intervention modelled?</b> <ul style="list-style-type: none"> <li>Not modelled at all: The data points associated with the intervention period are excluded from the analysis (no trend line).</li> </ul>                                            | multiple-choice <table border="1"> <tr> <td>99</td><td>Cannot be determined</td></tr> <tr> <td>0</td><td>Not modelled at all</td></tr> <tr> <td>1</td><td>As a single time point</td></tr> <tr> <td>2</td><td>As a separate intervention period</td></tr> <tr> <td>3</td><td>As part of the post-intervention period</td></tr> </table> | 99 | Cannot be determined | 0 | Not modelled at all                 | 1 | As a single time point | 2 | As a separate intervention period | 3 | As part of the post-intervention period |
| 99                                                                                                                                                                                                                                                                 | Cannot be determined                                                                                                                                                                                                                                                                                                                    |    |                      |   |                                     |   |                        |   |                                   |   |                                         |
| 0                                                                                                                                                                                                                                                                  | Not modelled at all                                                                                                                                                                                                                                                                                                                     |    |                      |   |                                     |   |                        |   |                                   |   |                                         |
| 1                                                                                                                                                                                                                                                                  | As a single time point                                                                                                                                                                                                                                                                                                                  |    |                      |   |                                     |   |                        |   |                                   |   |                                         |
| 2                                                                                                                                                                                                                                                                  | As a separate intervention period                                                                                                                                                                                                                                                                                                       |    |                      |   |                                     |   |                        |   |                                   |   |                                         |
| 3                                                                                                                                                                                                                                                                  | As part of the post-intervention period                                                                                                                                                                                                                                                                                                 |    |                      |   |                                     |   |                        |   |                                   |   |                                         |

| Question                                                                                                                                                                                                                                                                                                                                                                                                                                                                                                                                                                                                       | Options                                                                                                                                                                                          |   |    |   |                                     |   |                        |
|----------------------------------------------------------------------------------------------------------------------------------------------------------------------------------------------------------------------------------------------------------------------------------------------------------------------------------------------------------------------------------------------------------------------------------------------------------------------------------------------------------------------------------------------------------------------------------------------------------------|--------------------------------------------------------------------------------------------------------------------------------------------------------------------------------------------------|---|----|---|-------------------------------------|---|------------------------|
| <p><b>Outline and describe all the segments in the time series, as how they appear in the model</b> Use S1, S2, S3, etc. to label the segments. For each segment, state their start / end time and number of data points.</p> <p>If there are multiple time series with unclear/overlapping time points (such as multiple sites with staggered rollout), describe one representative time series and add a note to highlight that there are other similar time series for multiple sites.</p>                                                                                                                  | text                                                                                                                                                                                             |   |    |   |                                     |   |                        |
| <b>What is the number of segments model?</b>                                                                                                                                                                                                                                                                                                                                                                                                                                                                                                                                                                   | numeric                                                                                                                                                                                          |   |    |   |                                     |   |                        |
| <b>Can the number of data point per segment be determined from the model?</b>                                                                                                                                                                                                                                                                                                                                                                                                                                                                                                                                  | multiple-choice <table border="1"> <tr> <td>0</td><td>No</td></tr> <tr> <td>1</td><td>Yes - for some segments but not all</td></tr> <tr> <td>2</td><td>Yes - for all segments</td></tr> </table> | 0 | No | 1 | Yes - for some segments but not all | 2 | Yes - for all segments |
| 0                                                                                                                                                                                                                                                                                                                                                                                                                                                                                                                                                                                                              | No                                                                                                                                                                                               |   |    |   |                                     |   |                        |
| 1                                                                                                                                                                                                                                                                                                                                                                                                                                                                                                                                                                                                              | Yes - for some segments but not all                                                                                                                                                              |   |    |   |                                     |   |                        |
| 2                                                                                                                                                                                                                                                                                                                                                                                                                                                                                                                                                                                                              | Yes - for all segments                                                                                                                                                                           |   |    |   |                                     |   |                        |
| <b>Can the start/end dates of each segment be determined from the model?</b>                                                                                                                                                                                                                                                                                                                                                                                                                                                                                                                                   | multiple-choice <table border="1"> <tr> <td>0</td><td>No</td></tr> <tr> <td>1</td><td>Yes - for some segments but not all</td></tr> <tr> <td>2</td><td>Yes - for all segments</td></tr> </table> | 0 | No | 1 | Yes - for some segments but not all | 2 | Yes - for all segments |
| 0                                                                                                                                                                                                                                                                                                                                                                                                                                                                                                                                                                                                              | No                                                                                                                                                                                               |   |    |   |                                     |   |                        |
| 1                                                                                                                                                                                                                                                                                                                                                                                                                                                                                                                                                                                                              | Yes - for some segments but not all                                                                                                                                                              |   |    |   |                                     |   |                        |
| 2                                                                                                                                                                                                                                                                                                                                                                                                                                                                                                                                                                                                              | Yes - for all segments                                                                                                                                                                           |   |    |   |                                     |   |                        |
| <p><b>Which segments in the model will be compared to address the primary research question (PRQ)?</b></p> <p>Examples:</p> <ul style="list-style-type: none"> <li>The PRQ is comparing post- vs pre-interruption segments of the intervention series only → S3 vs S2; S2 vs S1</li> <li>The PRQ is comparing the (implementation + post-implementation segments) vs pre-interruption segments of the intervention series only → (S2+S3) vs S1</li> <li>The PRQ is comparing pre- vs post-interruption change btw intervention and control series → (S3 vs S1, intervention) vs (S3 vs S1, control)</li> </ul> | text                                                                                                                                                                                             |   |    |   |                                     |   |                        |

| Question                                                                             | Options                                                                                                                                                                                                                                                                                                                                                                                                                                                                                                                                                           |    |                      |   |              |   |              |     |                   |   |        |   |            |   |         |   |           |   |                |   |          |    |                              |     |                   |
|--------------------------------------------------------------------------------------|-------------------------------------------------------------------------------------------------------------------------------------------------------------------------------------------------------------------------------------------------------------------------------------------------------------------------------------------------------------------------------------------------------------------------------------------------------------------------------------------------------------------------------------------------------------------|----|----------------------|---|--------------|---|--------------|-----|-------------------|---|--------|---|------------|---|---------|---|-----------|---|----------------|---|----------|----|------------------------------|-----|-------------------|
| Did the authors provide the mathematical equation representing the model?            | multiple-choice<br><table border="1"> <tr> <td>1</td><td>Yes</td></tr> <tr> <td>0</td><td>No</td></tr> </table>                                                                                                                                                                                                                                                                                                                                                                                                                                                   | 1  | Yes                  | 0 | No           |   |              |     |                   |   |        |   |            |   |         |   |           |   |                |   |          |    |                              |     |                   |
| 1                                                                                    | Yes                                                                                                                                                                                                                                                                                                                                                                                                                                                                                                                                                               |    |                      |   |              |   |              |     |                   |   |        |   |            |   |         |   |           |   |                |   |          |    |                              |     |                   |
| 0                                                                                    | No                                                                                                                                                                                                                                                                                                                                                                                                                                                                                                                                                                |    |                      |   |              |   |              |     |                   |   |        |   |            |   |         |   |           |   |                |   |          |    |                              |     |                   |
| Which effect estimate will be calculated and reported?                               | checkbox<br><table border="1"> <tr> <td>99</td><td>Cannot be determined</td></tr> <tr> <td>1</td><td>Level change</td></tr> <tr> <td>2</td><td>Slope change</td></tr> <tr> <td>999</td><td>Other [elaborate]</td></tr> </table>                                                                                                                                                                                                                                                                                                                                   | 99 | Cannot be determined | 1 | Level change | 2 | Slope change | 999 | Other [elaborate] |   |        |   |            |   |         |   |           |   |                |   |          |    |                              |     |                   |
| 99                                                                                   | Cannot be determined                                                                                                                                                                                                                                                                                                                                                                                                                                                                                                                                              |    |                      |   |              |   |              |     |                   |   |        |   |            |   |         |   |           |   |                |   |          |    |                              |     |                   |
| 1                                                                                    | Level change                                                                                                                                                                                                                                                                                                                                                                                                                                                                                                                                                      |    |                      |   |              |   |              |     |                   |   |        |   |            |   |         |   |           |   |                |   |          |    |                              |     |                   |
| 2                                                                                    | Slope change                                                                                                                                                                                                                                                                                                                                                                                                                                                                                                                                                      |    |                      |   |              |   |              |     |                   |   |        |   |            |   |         |   |           |   |                |   |          |    |                              |     |                   |
| 999                                                                                  | Other [elaborate]                                                                                                                                                                                                                                                                                                                                                                                                                                                                                                                                                 |    |                      |   |              |   |              |     |                   |   |        |   |            |   |         |   |           |   |                |   |          |    |                              |     |                   |
| What is the time interval(s) that outcomes will be aggregated at in the time series? | checkbox<br><table border="1"> <tr> <td>99</td><td>Cannot be determined</td></tr> <tr> <td>1</td><td>Every minute</td></tr> <tr> <td>2</td><td>Hourly</td></tr> <tr> <td>3</td><td>Daily</td></tr> <tr> <td>4</td><td>Weekly</td></tr> <tr> <td>5</td><td>Two-weekly</td></tr> <tr> <td>6</td><td>Monthly</td></tr> <tr> <td>7</td><td>Quarterly</td></tr> <tr> <td>8</td><td>Every 6 months</td></tr> <tr> <td>9</td><td>Annually</td></tr> <tr> <td>10</td><td>Two periods (pre- and post-)</td></tr> <tr> <td>999</td><td>Other [elaborate]</td></tr> </table> | 99 | Cannot be determined | 1 | Every minute | 2 | Hourly       | 3   | Daily             | 4 | Weekly | 5 | Two-weekly | 6 | Monthly | 7 | Quarterly | 8 | Every 6 months | 9 | Annually | 10 | Two periods (pre- and post-) | 999 | Other [elaborate] |
| 99                                                                                   | Cannot be determined                                                                                                                                                                                                                                                                                                                                                                                                                                                                                                                                              |    |                      |   |              |   |              |     |                   |   |        |   |            |   |         |   |           |   |                |   |          |    |                              |     |                   |
| 1                                                                                    | Every minute                                                                                                                                                                                                                                                                                                                                                                                                                                                                                                                                                      |    |                      |   |              |   |              |     |                   |   |        |   |            |   |         |   |           |   |                |   |          |    |                              |     |                   |
| 2                                                                                    | Hourly                                                                                                                                                                                                                                                                                                                                                                                                                                                                                                                                                            |    |                      |   |              |   |              |     |                   |   |        |   |            |   |         |   |           |   |                |   |          |    |                              |     |                   |
| 3                                                                                    | Daily                                                                                                                                                                                                                                                                                                                                                                                                                                                                                                                                                             |    |                      |   |              |   |              |     |                   |   |        |   |            |   |         |   |           |   |                |   |          |    |                              |     |                   |
| 4                                                                                    | Weekly                                                                                                                                                                                                                                                                                                                                                                                                                                                                                                                                                            |    |                      |   |              |   |              |     |                   |   |        |   |            |   |         |   |           |   |                |   |          |    |                              |     |                   |
| 5                                                                                    | Two-weekly                                                                                                                                                                                                                                                                                                                                                                                                                                                                                                                                                        |    |                      |   |              |   |              |     |                   |   |        |   |            |   |         |   |           |   |                |   |          |    |                              |     |                   |
| 6                                                                                    | Monthly                                                                                                                                                                                                                                                                                                                                                                                                                                                                                                                                                           |    |                      |   |              |   |              |     |                   |   |        |   |            |   |         |   |           |   |                |   |          |    |                              |     |                   |
| 7                                                                                    | Quarterly                                                                                                                                                                                                                                                                                                                                                                                                                                                                                                                                                         |    |                      |   |              |   |              |     |                   |   |        |   |            |   |         |   |           |   |                |   |          |    |                              |     |                   |
| 8                                                                                    | Every 6 months                                                                                                                                                                                                                                                                                                                                                                                                                                                                                                                                                    |    |                      |   |              |   |              |     |                   |   |        |   |            |   |         |   |           |   |                |   |          |    |                              |     |                   |
| 9                                                                                    | Annually                                                                                                                                                                                                                                                                                                                                                                                                                                                                                                                                                          |    |                      |   |              |   |              |     |                   |   |        |   |            |   |         |   |           |   |                |   |          |    |                              |     |                   |
| 10                                                                                   | Two periods (pre- and post-)                                                                                                                                                                                                                                                                                                                                                                                                                                                                                                                                      |    |                      |   |              |   |              |     |                   |   |        |   |            |   |         |   |           |   |                |   |          |    |                              |     |                   |
| 999                                                                                  | Other [elaborate]                                                                                                                                                                                                                                                                                                                                                                                                                                                                                                                                                 |    |                      |   |              |   |              |     |                   |   |        |   |            |   |         |   |           |   |                |   |          |    |                              |     |                   |
| Describe the statistical methods used to analyse the ITS                             | text                                                                                                                                                                                                                                                                                                                                                                                                                                                                                                                                                              |    |                      |   |              |   |              |     |                   |   |        |   |            |   |         |   |           |   |                |   |          |    |                              |     |                   |

| Question                                                                                                                                                                                                                                                                                                                                                                      | Options                                                                                                                                                                                                                                                                                                                                                                                                                                                                                                                                                                                                                                                                     |    |                                                                  |   |                                                  |   |                   |   |                     |   |                     |   |                    |   |      |   |     |   |                              |   |                   |    |                                    |     |                   |
|-------------------------------------------------------------------------------------------------------------------------------------------------------------------------------------------------------------------------------------------------------------------------------------------------------------------------------------------------------------------------------|-----------------------------------------------------------------------------------------------------------------------------------------------------------------------------------------------------------------------------------------------------------------------------------------------------------------------------------------------------------------------------------------------------------------------------------------------------------------------------------------------------------------------------------------------------------------------------------------------------------------------------------------------------------------------------|----|------------------------------------------------------------------|---|--------------------------------------------------|---|-------------------|---|---------------------|---|---------------------|---|--------------------|---|------|---|-----|---|------------------------------|---|-------------------|----|------------------------------------|-----|-------------------|
| Copy and paste all relevant descriptions of the statistical methods from the article (note page no.). You should also add any important details that are not captured in the subsequent questions.                                                                                                                                                                            |                                                                                                                                                                                                                                                                                                                                                                                                                                                                                                                                                                                                                                                                             |    |                                                                  |   |                                                  |   |                   |   |                     |   |                     |   |                    |   |      |   |     |   |                              |   |                   |    |                                    |     |                   |
| <p><b>Which statistical method(s) will be used to estimate the difference between pre- and post-interruption segments?</b></p> <p>Some options (e.g. linear/logistic regression) may encompass both ITS and non-ITS methods. The latter is applicable when there is regression without a continuous time variable, only a binary indicator variable for pre-post periods.</p> | <p>checkbox</p> <table border="1"> <tr> <td>99</td><td>Cannot be determined</td></tr> <tr> <td>1</td><td>Autoregressive integrated moving average (ARIMA)</td></tr> <tr> <td>2</td><td>Linear regression</td></tr> <tr> <td>3</td><td>Logistic regression</td></tr> <tr> <td>4</td><td>Binomial regression</td></tr> <tr> <td>5</td><td>Poisson regression</td></tr> <tr> <td>6</td><td>GLMM</td></tr> <tr> <td>7</td><td>GEE</td></tr> <tr> <td>8</td><td>Negative binomial regression</td></tr> <tr> <td>9</td><td>GLM (unspecified)</td></tr> <tr> <td>10</td><td>Segmented regression (unspecified)</td></tr> <tr> <td>999</td><td>Other [elaborate]</td></tr> </table> | 99 | Cannot be determined                                             | 1 | Autoregressive integrated moving average (ARIMA) | 2 | Linear regression | 3 | Logistic regression | 4 | Binomial regression | 5 | Poisson regression | 6 | GLMM | 7 | GEE | 8 | Negative binomial regression | 9 | GLM (unspecified) | 10 | Segmented regression (unspecified) | 999 | Other [elaborate] |
| 99                                                                                                                                                                                                                                                                                                                                                                            | Cannot be determined                                                                                                                                                                                                                                                                                                                                                                                                                                                                                                                                                                                                                                                        |    |                                                                  |   |                                                  |   |                   |   |                     |   |                     |   |                    |   |      |   |     |   |                              |   |                   |    |                                    |     |                   |
| 1                                                                                                                                                                                                                                                                                                                                                                             | Autoregressive integrated moving average (ARIMA)                                                                                                                                                                                                                                                                                                                                                                                                                                                                                                                                                                                                                            |    |                                                                  |   |                                                  |   |                   |   |                     |   |                     |   |                    |   |      |   |     |   |                              |   |                   |    |                                    |     |                   |
| 2                                                                                                                                                                                                                                                                                                                                                                             | Linear regression                                                                                                                                                                                                                                                                                                                                                                                                                                                                                                                                                                                                                                                           |    |                                                                  |   |                                                  |   |                   |   |                     |   |                     |   |                    |   |      |   |     |   |                              |   |                   |    |                                    |     |                   |
| 3                                                                                                                                                                                                                                                                                                                                                                             | Logistic regression                                                                                                                                                                                                                                                                                                                                                                                                                                                                                                                                                                                                                                                         |    |                                                                  |   |                                                  |   |                   |   |                     |   |                     |   |                    |   |      |   |     |   |                              |   |                   |    |                                    |     |                   |
| 4                                                                                                                                                                                                                                                                                                                                                                             | Binomial regression                                                                                                                                                                                                                                                                                                                                                                                                                                                                                                                                                                                                                                                         |    |                                                                  |   |                                                  |   |                   |   |                     |   |                     |   |                    |   |      |   |     |   |                              |   |                   |    |                                    |     |                   |
| 5                                                                                                                                                                                                                                                                                                                                                                             | Poisson regression                                                                                                                                                                                                                                                                                                                                                                                                                                                                                                                                                                                                                                                          |    |                                                                  |   |                                                  |   |                   |   |                     |   |                     |   |                    |   |      |   |     |   |                              |   |                   |    |                                    |     |                   |
| 6                                                                                                                                                                                                                                                                                                                                                                             | GLMM                                                                                                                                                                                                                                                                                                                                                                                                                                                                                                                                                                                                                                                                        |    |                                                                  |   |                                                  |   |                   |   |                     |   |                     |   |                    |   |      |   |     |   |                              |   |                   |    |                                    |     |                   |
| 7                                                                                                                                                                                                                                                                                                                                                                             | GEE                                                                                                                                                                                                                                                                                                                                                                                                                                                                                                                                                                                                                                                                         |    |                                                                  |   |                                                  |   |                   |   |                     |   |                     |   |                    |   |      |   |     |   |                              |   |                   |    |                                    |     |                   |
| 8                                                                                                                                                                                                                                                                                                                                                                             | Negative binomial regression                                                                                                                                                                                                                                                                                                                                                                                                                                                                                                                                                                                                                                                |    |                                                                  |   |                                                  |   |                   |   |                     |   |                     |   |                    |   |      |   |     |   |                              |   |                   |    |                                    |     |                   |
| 9                                                                                                                                                                                                                                                                                                                                                                             | GLM (unspecified)                                                                                                                                                                                                                                                                                                                                                                                                                                                                                                                                                                                                                                                           |    |                                                                  |   |                                                  |   |                   |   |                     |   |                     |   |                    |   |      |   |     |   |                              |   |                   |    |                                    |     |                   |
| 10                                                                                                                                                                                                                                                                                                                                                                            | Segmented regression (unspecified)                                                                                                                                                                                                                                                                                                                                                                                                                                                                                                                                                                                                                                          |    |                                                                  |   |                                                  |   |                   |   |                     |   |                     |   |                    |   |      |   |     |   |                              |   |                   |    |                                    |     |                   |
| 999                                                                                                                                                                                                                                                                                                                                                                           | Other [elaborate]                                                                                                                                                                                                                                                                                                                                                                                                                                                                                                                                                                                                                                                           |    |                                                                  |   |                                                  |   |                   |   |                     |   |                     |   |                    |   |      |   |     |   |                              |   |                   |    |                                    |     |                   |
| <p><b>Did the authors make any mention of autocorrelation?</b></p> <p>Also known as "serial dependence", "serial correlation"</p>                                                                                                                                                                                                                                             | <p>multiple-choice</p> <table border="1"> <tr> <td>1</td><td>Yes</td></tr> <tr> <td>0</td><td>No</td></tr> </table>                                                                                                                                                                                                                                                                                                                                                                                                                                                                                                                                                         | 1  | Yes                                                              | 0 | No                                               |   |                   |   |                     |   |                     |   |                    |   |      |   |     |   |                              |   |                   |    |                                    |     |                   |
| 1                                                                                                                                                                                                                                                                                                                                                                             | Yes                                                                                                                                                                                                                                                                                                                                                                                                                                                                                                                                                                                                                                                                         |    |                                                                  |   |                                                  |   |                   |   |                     |   |                     |   |                    |   |      |   |     |   |                              |   |                   |    |                                    |     |                   |
| 0                                                                                                                                                                                                                                                                                                                                                                             | No                                                                                                                                                                                                                                                                                                                                                                                                                                                                                                                                                                                                                                                                          |    |                                                                  |   |                                                  |   |                   |   |                     |   |                     |   |                    |   |      |   |     |   |                              |   |                   |    |                                    |     |                   |
| <p><b>How will the authors decide whether to adjust for autocorrelation?</b></p> <ul style="list-style-type: none"> <li>Decide based on a visual or statistical test for presence of autocorrelation: authors decide whether to adjust for autocorrelation based on visual inspection of plots (e.g. ACF &amp; PACF, histograms) or statistical tests (e.g.</li> </ul>        | <p>checkbox</p> <table border="1"> <tr> <td>99</td><td>Cannot be determined - author did not describe any decision rule</td></tr> </table>                                                                                                                                                                                                                                                                                                                                                                                                                                                                                                                                  | 99 | Cannot be determined - author did not describe any decision rule |   |                                                  |   |                   |   |                     |   |                     |   |                    |   |      |   |     |   |                              |   |                   |    |                                    |     |                   |
| 99                                                                                                                                                                                                                                                                                                                                                                            | Cannot be determined - author did not describe any decision rule                                                                                                                                                                                                                                                                                                                                                                                                                                                                                                                                                                                                            |    |                                                                  |   |                                                  |   |                   |   |                     |   |                     |   |                    |   |      |   |     |   |                              |   |                   |    |                                    |     |                   |

| Question                                                                                                                                                                                                                                                                                                                                                                                                                                                                                                                                                                                                                                                                                                                                                                                                                                                                                                                                           | Options                                                                                                                                                                                                                                                                                                                                                                                                                                                                                                                                                                                                                                                                       |    |                                                                                                        |   |                                                                                             |   |                                                                                                          |   |                                             |     |                                                                                   |     |                   |
|----------------------------------------------------------------------------------------------------------------------------------------------------------------------------------------------------------------------------------------------------------------------------------------------------------------------------------------------------------------------------------------------------------------------------------------------------------------------------------------------------------------------------------------------------------------------------------------------------------------------------------------------------------------------------------------------------------------------------------------------------------------------------------------------------------------------------------------------------------------------------------------------------------------------------------------------------|-------------------------------------------------------------------------------------------------------------------------------------------------------------------------------------------------------------------------------------------------------------------------------------------------------------------------------------------------------------------------------------------------------------------------------------------------------------------------------------------------------------------------------------------------------------------------------------------------------------------------------------------------------------------------------|----|--------------------------------------------------------------------------------------------------------|---|---------------------------------------------------------------------------------------------|---|----------------------------------------------------------------------------------------------------------|---|---------------------------------------------|-----|-----------------------------------------------------------------------------------|-----|-------------------|
| <p>Durbin-Watson, Cumby-Huizinga), and go with one model only, without fitting multiple models.</p> <ul style="list-style-type: none"> <li>Run multiple models with different autocorrelation parameters and select based on model fit: e.g. the Box-Jenkins method of fitting ARIMA models. The final model may be selected based on improved fit (AIC), no residual autocorrelation (Ljung-Box) or any other criteria set by authors.</li> <li>Always adjust for autocorrelation: authors described a specific method of autocorrelation e.g. "We will use method xyz to adjust for autocorrelation" without any mention of a test or fitting multiple models</li> <li>Fit an ARIMA model (no further information): authors mentioned the use of "the ARIMA method", "the Box-Jenkins method" or "fitting an ARIMA model" without providing any information on how the parameters are selected and how the final models are selected.</li> </ul> | <table border="1"> <tr> <td>1</td><td>Decide based on a visual or statistical test for presence of autocorrelation</td></tr> <tr> <td>2</td><td>Run multiple models with different autocorrelation parameters and select based on model fit</td></tr> <tr> <td>3</td><td>Always adjust for autocorrelation</td></tr> <tr> <td>4</td><td>Fit an ARIMA model (no further information)</td></tr> <tr> <td>999</td><td>Other [elaborate]</td></tr> </table>                                                                                                                                                                                                                       | 1  | Decide based on a visual or statistical test for presence of autocorrelation                           | 2 | Run multiple models with different autocorrelation parameters and select based on model fit | 3 | Always adjust for autocorrelation                                                                        | 4 | Fit an ARIMA model (no further information) | 999 | Other [elaborate]                                                                 |     |                   |
| 1                                                                                                                                                                                                                                                                                                                                                                                                                                                                                                                                                                                                                                                                                                                                                                                                                                                                                                                                                  | Decide based on a visual or statistical test for presence of autocorrelation                                                                                                                                                                                                                                                                                                                                                                                                                                                                                                                                                                                                  |    |                                                                                                        |   |                                                                                             |   |                                                                                                          |   |                                             |     |                                                                                   |     |                   |
| 2                                                                                                                                                                                                                                                                                                                                                                                                                                                                                                                                                                                                                                                                                                                                                                                                                                                                                                                                                  | Run multiple models with different autocorrelation parameters and select based on model fit                                                                                                                                                                                                                                                                                                                                                                                                                                                                                                                                                                                   |    |                                                                                                        |   |                                                                                             |   |                                                                                                          |   |                                             |     |                                                                                   |     |                   |
| 3                                                                                                                                                                                                                                                                                                                                                                                                                                                                                                                                                                                                                                                                                                                                                                                                                                                                                                                                                  | Always adjust for autocorrelation                                                                                                                                                                                                                                                                                                                                                                                                                                                                                                                                                                                                                                             |    |                                                                                                        |   |                                                                                             |   |                                                                                                          |   |                                             |     |                                                                                   |     |                   |
| 4                                                                                                                                                                                                                                                                                                                                                                                                                                                                                                                                                                                                                                                                                                                                                                                                                                                                                                                                                  | Fit an ARIMA model (no further information)                                                                                                                                                                                                                                                                                                                                                                                                                                                                                                                                                                                                                                   |    |                                                                                                        |   |                                                                                             |   |                                                                                                          |   |                                             |     |                                                                                   |     |                   |
| 999                                                                                                                                                                                                                                                                                                                                                                                                                                                                                                                                                                                                                                                                                                                                                                                                                                                                                                                                                | Other [elaborate]                                                                                                                                                                                                                                                                                                                                                                                                                                                                                                                                                                                                                                                             |    |                                                                                                        |   |                                                                                             |   |                                                                                                          |   |                                             |     |                                                                                   |     |                   |
| <p><b>How will the presence of autocorrelation be tested?</b><br/>These tests can be conducted either before or after model identification and selecting.</p>                                                                                                                                                                                                                                                                                                                                                                                                                                                                                                                                                                                                                                                                                                                                                                                      | <p>checkbox</p> <table border="1"> <tr> <td>99</td><td>Cannot be determined - authors did not describe clearly a method to detect presence of autocorrelation</td></tr> <tr> <td>1</td><td>Statistical test (e.g. Durbin-Watson, Breusch-Godfrey, Ljung-Box, Cumby-Huizinga tests)</td></tr> <tr> <td>2</td><td>Visual inspection of time series (autocorrelation and partial autocorrelation function plots, histogram)</td></tr> <tr> <td>3</td><td>Statistically significant parameters</td></tr> <tr> <td>4</td><td>Improved model fit after autocorrelation was accounted for (AIC, likelihood test)</td></tr> <tr> <td>999</td><td>Other [elaborate]</td></tr> </table> | 99 | Cannot be determined - authors did not describe clearly a method to detect presence of autocorrelation | 1 | Statistical test (e.g. Durbin-Watson, Breusch-Godfrey, Ljung-Box, Cumby-Huizinga tests)     | 2 | Visual inspection of time series (autocorrelation and partial autocorrelation function plots, histogram) | 3 | Statistically significant parameters        | 4   | Improved model fit after autocorrelation was accounted for (AIC, likelihood test) | 999 | Other [elaborate] |
| 99                                                                                                                                                                                                                                                                                                                                                                                                                                                                                                                                                                                                                                                                                                                                                                                                                                                                                                                                                 | Cannot be determined - authors did not describe clearly a method to detect presence of autocorrelation                                                                                                                                                                                                                                                                                                                                                                                                                                                                                                                                                                        |    |                                                                                                        |   |                                                                                             |   |                                                                                                          |   |                                             |     |                                                                                   |     |                   |
| 1                                                                                                                                                                                                                                                                                                                                                                                                                                                                                                                                                                                                                                                                                                                                                                                                                                                                                                                                                  | Statistical test (e.g. Durbin-Watson, Breusch-Godfrey, Ljung-Box, Cumby-Huizinga tests)                                                                                                                                                                                                                                                                                                                                                                                                                                                                                                                                                                                       |    |                                                                                                        |   |                                                                                             |   |                                                                                                          |   |                                             |     |                                                                                   |     |                   |
| 2                                                                                                                                                                                                                                                                                                                                                                                                                                                                                                                                                                                                                                                                                                                                                                                                                                                                                                                                                  | Visual inspection of time series (autocorrelation and partial autocorrelation function plots, histogram)                                                                                                                                                                                                                                                                                                                                                                                                                                                                                                                                                                      |    |                                                                                                        |   |                                                                                             |   |                                                                                                          |   |                                             |     |                                                                                   |     |                   |
| 3                                                                                                                                                                                                                                                                                                                                                                                                                                                                                                                                                                                                                                                                                                                                                                                                                                                                                                                                                  | Statistically significant parameters                                                                                                                                                                                                                                                                                                                                                                                                                                                                                                                                                                                                                                          |    |                                                                                                        |   |                                                                                             |   |                                                                                                          |   |                                             |     |                                                                                   |     |                   |
| 4                                                                                                                                                                                                                                                                                                                                                                                                                                                                                                                                                                                                                                                                                                                                                                                                                                                                                                                                                  | Improved model fit after autocorrelation was accounted for (AIC, likelihood test)                                                                                                                                                                                                                                                                                                                                                                                                                                                                                                                                                                                             |    |                                                                                                        |   |                                                                                             |   |                                                                                                          |   |                                             |     |                                                                                   |     |                   |
| 999                                                                                                                                                                                                                                                                                                                                                                                                                                                                                                                                                                                                                                                                                                                                                                                                                                                                                                                                                | Other [elaborate]                                                                                                                                                                                                                                                                                                                                                                                                                                                                                                                                                                                                                                                             |    |                                                                                                        |   |                                                                                             |   |                                                                                                          |   |                                             |     |                                                                                   |     |                   |
| <p><b>How will autocorrelation be adjusted?</b><br/>Option "Not applicable" only applies when autocorrelation will not be investigated at all. It does not apply when the authors have conducted diagnostic model fit and concluded that autocorrelation was not present.</p>                                                                                                                                                                                                                                                                                                                                                                                                                                                                                                                                                                                                                                                                      | <p>checkbox</p> <table border="1"> <tr> <td>99</td><td>Cannot be determined - author did not describe clearly a method to adjust for autocorrelation</td></tr> </table>                                                                                                                                                                                                                                                                                                                                                                                                                                                                                                       | 99 | Cannot be determined - author did not describe clearly a method to adjust for autocorrelation          |   |                                                                                             |   |                                                                                                          |   |                                             |     |                                                                                   |     |                   |
| 99                                                                                                                                                                                                                                                                                                                                                                                                                                                                                                                                                                                                                                                                                                                                                                                                                                                                                                                                                 | Cannot be determined - author did not describe clearly a method to adjust for autocorrelation                                                                                                                                                                                                                                                                                                                                                                                                                                                                                                                                                                                 |    |                                                                                                        |   |                                                                                             |   |                                                                                                          |   |                                             |     |                                                                                   |     |                   |



| Question                                                                                                                                                                                                                                                                  | Options                                                                                                                                                                                                                                                                                                                                                                                                                                                                                                                                                                                                                                                                                                                                                                       |    |                                                                                             |   |                                                                                                                         |   |                                                                                     |     |                                                                               |   |                                            |   |                                                        |   |                                                     |
|---------------------------------------------------------------------------------------------------------------------------------------------------------------------------------------------------------------------------------------------------------------------------|-------------------------------------------------------------------------------------------------------------------------------------------------------------------------------------------------------------------------------------------------------------------------------------------------------------------------------------------------------------------------------------------------------------------------------------------------------------------------------------------------------------------------------------------------------------------------------------------------------------------------------------------------------------------------------------------------------------------------------------------------------------------------------|----|---------------------------------------------------------------------------------------------|---|-------------------------------------------------------------------------------------------------------------------------|---|-------------------------------------------------------------------------------------|-----|-------------------------------------------------------------------------------|---|--------------------------------------------|---|--------------------------------------------------------|---|-----------------------------------------------------|
|                                                                                                                                                                                                                                                                           | <table border="1"> <tr> <td>0</td> <td>Not applicable - author confirmed autocorrelation will not be investigated and adjusted</td> </tr> <tr> <td>1</td> <td>Use non-ARIMA methods to adjust (e.g. Newey-West, Prais-Winsten, GLS, REML) or model (adding lag terms) autocorrelation</td> </tr> <tr> <td>2</td> <td>Directly model the error structure using ARIMA</td> </tr> <tr> <td>999</td> <td>Other [elaborate]</td> </tr> </table>                                                                                                                                                                                                                                                                                                                                    | 0  | Not applicable - author confirmed autocorrelation will not be investigated and adjusted     | 1 | Use non-ARIMA methods to adjust (e.g. Newey-West, Prais-Winsten, GLS, REML) or model (adding lag terms) autocorrelation | 2 | Directly model the error structure using ARIMA                                      | 999 | Other [elaborate]                                                             |   |                                            |   |                                                        |   |                                                     |
| 0                                                                                                                                                                                                                                                                         | Not applicable - author confirmed autocorrelation will not be investigated and adjusted                                                                                                                                                                                                                                                                                                                                                                                                                                                                                                                                                                                                                                                                                       |    |                                                                                             |   |                                                                                                                         |   |                                                                                     |     |                                                                               |   |                                            |   |                                                        |   |                                                     |
| 1                                                                                                                                                                                                                                                                         | Use non-ARIMA methods to adjust (e.g. Newey-West, Prais-Winsten, GLS, REML) or model (adding lag terms) autocorrelation                                                                                                                                                                                                                                                                                                                                                                                                                                                                                                                                                                                                                                                       |    |                                                                                             |   |                                                                                                                         |   |                                                                                     |     |                                                                               |   |                                            |   |                                                        |   |                                                     |
| 2                                                                                                                                                                                                                                                                         | Directly model the error structure using ARIMA                                                                                                                                                                                                                                                                                                                                                                                                                                                                                                                                                                                                                                                                                                                                |    |                                                                                             |   |                                                                                                                         |   |                                                                                     |     |                                                                               |   |                                            |   |                                                        |   |                                                     |
| 999                                                                                                                                                                                                                                                                       | Other [elaborate]                                                                                                                                                                                                                                                                                                                                                                                                                                                                                                                                                                                                                                                                                                                                                             |    |                                                                                             |   |                                                                                                                         |   |                                                                                     |     |                                                                               |   |                                            |   |                                                        |   |                                                     |
| <p><b>Did the authors make any mention of seasonality?</b><br/>Also known as "seasonal variation", "seasonal cycles", "periodic fluctuations" or phrases to that effect.</p>                                                                                              | <p>multiple-choice</p> <table border="1"> <tr> <td>1</td> <td>Yes</td> </tr> <tr> <td>0</td> <td>No</td> </tr> </table>                                                                                                                                                                                                                                                                                                                                                                                                                                                                                                                                                                                                                                                       | 1  | Yes                                                                                         | 0 | No                                                                                                                      |   |                                                                                     |     |                                                                               |   |                                            |   |                                                        |   |                                                     |
| 1                                                                                                                                                                                                                                                                         | Yes                                                                                                                                                                                                                                                                                                                                                                                                                                                                                                                                                                                                                                                                                                                                                                           |    |                                                                                             |   |                                                                                                                         |   |                                                                                     |     |                                                                               |   |                                            |   |                                                        |   |                                                     |
| 0                                                                                                                                                                                                                                                                         | No                                                                                                                                                                                                                                                                                                                                                                                                                                                                                                                                                                                                                                                                                                                                                                            |    |                                                                                             |   |                                                                                                                         |   |                                                                                     |     |                                                                               |   |                                            |   |                                                        |   |                                                     |
| <p><b>How will seasonality be tested and/or adjusted?</b><br/>Option "Not applicable" only applies when seasonality will not be investigated at all. It does not apply when the authors have conducted investigations and concluded that seasonality was not present.</p> | <p>checkbox</p> <table border="1"> <tr> <td>99</td> <td>Cannot be determined - author did not describe clearly a method of dealing with seasonality</td> </tr> <tr> <td>0</td> <td>Not applicable - author specified seasonality will not be investigated and adjusted</td> </tr> <tr> <td>1</td> <td>Determine whether seasonality is present, either visually or via a statistical test</td> </tr> <tr> <td>2</td> <td>Adjust by adding a regression term for time (e.g. months, seasons) into model</td> </tr> <tr> <td>3</td> <td>Adjust by fitting Fourier terms into model</td> </tr> <tr> <td>4</td> <td>Adjust by fitting a spline function of time into model</td> </tr> <tr> <td>5</td> <td>Adjust by modelling under ARIMA (e.g. SARIMA model)</td> </tr> </table> | 99 | Cannot be determined - author did not describe clearly a method of dealing with seasonality | 0 | Not applicable - author specified seasonality will not be investigated and adjusted                                     | 1 | Determine whether seasonality is present, either visually or via a statistical test | 2   | Adjust by adding a regression term for time (e.g. months, seasons) into model | 3 | Adjust by fitting Fourier terms into model | 4 | Adjust by fitting a spline function of time into model | 5 | Adjust by modelling under ARIMA (e.g. SARIMA model) |
| 99                                                                                                                                                                                                                                                                        | Cannot be determined - author did not describe clearly a method of dealing with seasonality                                                                                                                                                                                                                                                                                                                                                                                                                                                                                                                                                                                                                                                                                   |    |                                                                                             |   |                                                                                                                         |   |                                                                                     |     |                                                                               |   |                                            |   |                                                        |   |                                                     |
| 0                                                                                                                                                                                                                                                                         | Not applicable - author specified seasonality will not be investigated and adjusted                                                                                                                                                                                                                                                                                                                                                                                                                                                                                                                                                                                                                                                                                           |    |                                                                                             |   |                                                                                                                         |   |                                                                                     |     |                                                                               |   |                                            |   |                                                        |   |                                                     |
| 1                                                                                                                                                                                                                                                                         | Determine whether seasonality is present, either visually or via a statistical test                                                                                                                                                                                                                                                                                                                                                                                                                                                                                                                                                                                                                                                                                           |    |                                                                                             |   |                                                                                                                         |   |                                                                                     |     |                                                                               |   |                                            |   |                                                        |   |                                                     |
| 2                                                                                                                                                                                                                                                                         | Adjust by adding a regression term for time (e.g. months, seasons) into model                                                                                                                                                                                                                                                                                                                                                                                                                                                                                                                                                                                                                                                                                                 |    |                                                                                             |   |                                                                                                                         |   |                                                                                     |     |                                                                               |   |                                            |   |                                                        |   |                                                     |
| 3                                                                                                                                                                                                                                                                         | Adjust by fitting Fourier terms into model                                                                                                                                                                                                                                                                                                                                                                                                                                                                                                                                                                                                                                                                                                                                    |    |                                                                                             |   |                                                                                                                         |   |                                                                                     |     |                                                                               |   |                                            |   |                                                        |   |                                                     |
| 4                                                                                                                                                                                                                                                                         | Adjust by fitting a spline function of time into model                                                                                                                                                                                                                                                                                                                                                                                                                                                                                                                                                                                                                                                                                                                        |    |                                                                                             |   |                                                                                                                         |   |                                                                                     |     |                                                                               |   |                                            |   |                                                        |   |                                                     |
| 5                                                                                                                                                                                                                                                                         | Adjust by modelling under ARIMA (e.g. SARIMA model)                                                                                                                                                                                                                                                                                                                                                                                                                                                                                                                                                                                                                                                                                                                           |    |                                                                                             |   |                                                                                                                         |   |                                                                                     |     |                                                                               |   |                                            |   |                                                        |   |                                                     |

| Question                                                                                                                                                                                                                                                                 | Options                                                                                                                                                                                                                                                                                                                                                                                                                                                                                                                                                                                                                                                                                            |    |                                                                                                 |     |                                                                                               |   |                                                                                                                             |   |                                                                       |   |                                                                  |     |                   |
|--------------------------------------------------------------------------------------------------------------------------------------------------------------------------------------------------------------------------------------------------------------------------|----------------------------------------------------------------------------------------------------------------------------------------------------------------------------------------------------------------------------------------------------------------------------------------------------------------------------------------------------------------------------------------------------------------------------------------------------------------------------------------------------------------------------------------------------------------------------------------------------------------------------------------------------------------------------------------------------|----|-------------------------------------------------------------------------------------------------|-----|-----------------------------------------------------------------------------------------------|---|-----------------------------------------------------------------------------------------------------------------------------|---|-----------------------------------------------------------------------|---|------------------------------------------------------------------|-----|-------------------|
|                                                                                                                                                                                                                                                                          | <table border="1"> <tr> <td>6</td><td>Compare to a control that is not affected by seasonality</td></tr> <tr> <td>999</td><td>Other [elaborate]</td></tr> </table>                                                                                                                                                                                                                                                                                                                                                                                                                                                                                                                                 | 6  | Compare to a control that is not affected by seasonality                                        | 999 | Other [elaborate]                                                                             |   |                                                                                                                             |   |                                                                       |   |                                                                  |     |                   |
| 6                                                                                                                                                                                                                                                                        | Compare to a control that is not affected by seasonality                                                                                                                                                                                                                                                                                                                                                                                                                                                                                                                                                                                                                                           |    |                                                                                                 |     |                                                                                               |   |                                                                                                                             |   |                                                                       |   |                                                                  |     |                   |
| 999                                                                                                                                                                                                                                                                      | Other [elaborate]                                                                                                                                                                                                                                                                                                                                                                                                                                                                                                                                                                                                                                                                                  |    |                                                                                                 |     |                                                                                               |   |                                                                                                                             |   |                                                                       |   |                                                                  |     |                   |
| Did the authors make any mention of non-stationarity?                                                                                                                                                                                                                    | multiple-choice <table border="1"> <tr> <td>1</td><td>Yes</td></tr> <tr> <td>0</td><td>No</td></tr> </table>                                                                                                                                                                                                                                                                                                                                                                                                                                                                                                                                                                                       | 1  | Yes                                                                                             | 0   | No                                                                                            |   |                                                                                                                             |   |                                                                       |   |                                                                  |     |                   |
| 1                                                                                                                                                                                                                                                                        | Yes                                                                                                                                                                                                                                                                                                                                                                                                                                                                                                                                                                                                                                                                                                |    |                                                                                                 |     |                                                                                               |   |                                                                                                                             |   |                                                                       |   |                                                                  |     |                   |
| 0                                                                                                                                                                                                                                                                        | No                                                                                                                                                                                                                                                                                                                                                                                                                                                                                                                                                                                                                                                                                                 |    |                                                                                                 |     |                                                                                               |   |                                                                                                                             |   |                                                                       |   |                                                                  |     |                   |
| <b>How will non-stationarity be detected and/or adjusted?</b><br>Option "Not applicable" only applies when seasonality will not be investigated at all. It does not apply when the authors have conducted investigations and concluded that seasonality was not present. | checkbox <table border="1"> <tr> <td>99</td><td>Cannot be determined - author did not describe clearly a method of dealing with nonstationarity</td></tr> <tr> <td>0</td><td>Not applicable - author specified nonstationarity will not be investigated and adjusted</td></tr> <tr> <td>1</td><td>Determine whether nonstationarity is present, either visually or via a statistical test (e.g. Augmented Dickey-Fuller test)</td></tr> <tr> <td>2</td><td>Transform to stationary series by differencing using non-ARIMA method</td></tr> <tr> <td>3</td><td>Transform to stationary series by differencing under ARIMA model</td></tr> <tr> <td>999</td><td>Other [elaborate]</td></tr> </table> | 99 | Cannot be determined - author did not describe clearly a method of dealing with nonstationarity | 0   | Not applicable - author specified nonstationarity will not be investigated and adjusted       | 1 | Determine whether nonstationarity is present, either visually or via a statistical test (e.g. Augmented Dickey-Fuller test) | 2 | Transform to stationary series by differencing using non-ARIMA method | 3 | Transform to stationary series by differencing under ARIMA model | 999 | Other [elaborate] |
| 99                                                                                                                                                                                                                                                                       | Cannot be determined - author did not describe clearly a method of dealing with nonstationarity                                                                                                                                                                                                                                                                                                                                                                                                                                                                                                                                                                                                    |    |                                                                                                 |     |                                                                                               |   |                                                                                                                             |   |                                                                       |   |                                                                  |     |                   |
| 0                                                                                                                                                                                                                                                                        | Not applicable - author specified nonstationarity will not be investigated and adjusted                                                                                                                                                                                                                                                                                                                                                                                                                                                                                                                                                                                                            |    |                                                                                                 |     |                                                                                               |   |                                                                                                                             |   |                                                                       |   |                                                                  |     |                   |
| 1                                                                                                                                                                                                                                                                        | Determine whether nonstationarity is present, either visually or via a statistical test (e.g. Augmented Dickey-Fuller test)                                                                                                                                                                                                                                                                                                                                                                                                                                                                                                                                                                        |    |                                                                                                 |     |                                                                                               |   |                                                                                                                             |   |                                                                       |   |                                                                  |     |                   |
| 2                                                                                                                                                                                                                                                                        | Transform to stationary series by differencing using non-ARIMA method                                                                                                                                                                                                                                                                                                                                                                                                                                                                                                                                                                                                                              |    |                                                                                                 |     |                                                                                               |   |                                                                                                                             |   |                                                                       |   |                                                                  |     |                   |
| 3                                                                                                                                                                                                                                                                        | Transform to stationary series by differencing under ARIMA model                                                                                                                                                                                                                                                                                                                                                                                                                                                                                                                                                                                                                                   |    |                                                                                                 |     |                                                                                               |   |                                                                                                                             |   |                                                                       |   |                                                                  |     |                   |
| 999                                                                                                                                                                                                                                                                      | Other [elaborate]                                                                                                                                                                                                                                                                                                                                                                                                                                                                                                                                                                                                                                                                                  |    |                                                                                                 |     |                                                                                               |   |                                                                                                                             |   |                                                                       |   |                                                                  |     |                   |
| How will anomalous or outlying data points be handled?                                                                                                                                                                                                                   | checkbox <table border="1"> <tr> <td>99</td><td>Cannot be determined - author did not mention anomaly or outliers</td></tr> <tr> <td>0</td><td>Not applicable - author specified anomalous or outlying data points will not be accounted for</td></tr> </table>                                                                                                                                                                                                                                                                                                                                                                                                                                    | 99 | Cannot be determined - author did not mention anomaly or outliers                               | 0   | Not applicable - author specified anomalous or outlying data points will not be accounted for |   |                                                                                                                             |   |                                                                       |   |                                                                  |     |                   |
| 99                                                                                                                                                                                                                                                                       | Cannot be determined - author did not mention anomaly or outliers                                                                                                                                                                                                                                                                                                                                                                                                                                                                                                                                                                                                                                  |    |                                                                                                 |     |                                                                                               |   |                                                                                                                             |   |                                                                       |   |                                                                  |     |                   |
| 0                                                                                                                                                                                                                                                                        | Not applicable - author specified anomalous or outlying data points will not be accounted for                                                                                                                                                                                                                                                                                                                                                                                                                                                                                                                                                                                                      |    |                                                                                                 |     |                                                                                               |   |                                                                                                                             |   |                                                                       |   |                                                                  |     |                   |

| Question                                                                                                                       | Options                                                                                                                                                                                                                                                                                                                                                                                                                        |    |                                                                                       |   |                                                              |   |                                                           |   |                                                                                           |     |                   |
|--------------------------------------------------------------------------------------------------------------------------------|--------------------------------------------------------------------------------------------------------------------------------------------------------------------------------------------------------------------------------------------------------------------------------------------------------------------------------------------------------------------------------------------------------------------------------|----|---------------------------------------------------------------------------------------|---|--------------------------------------------------------------|---|-----------------------------------------------------------|---|-------------------------------------------------------------------------------------------|-----|-------------------|
|                                                                                                                                | <table border="1"> <tr> <td>1</td><td>Determine using a threshold or decision rule specified by author</td></tr> <tr> <td>2</td><td>Exclude from analysis</td></tr> <tr> <td>3</td><td>Analyse separately from the main time series</td></tr> <tr> <td>4</td><td>Include in the main time series but acknowledge them as anomalous or outlying data points</td></tr> <tr> <td>999</td><td>Other [elaborate]</td></tr> </table> | 1  | Determine using a threshold or decision rule specified by author                      | 2 | Exclude from analysis                                        | 3 | Analyse separately from the main time series              | 4 | Include in the main time series but acknowledge them as anomalous or outlying data points | 999 | Other [elaborate] |
| 1                                                                                                                              | Determine using a threshold or decision rule specified by author                                                                                                                                                                                                                                                                                                                                                               |    |                                                                                       |   |                                                              |   |                                                           |   |                                                                                           |     |                   |
| 2                                                                                                                              | Exclude from analysis                                                                                                                                                                                                                                                                                                                                                                                                          |    |                                                                                       |   |                                                              |   |                                                           |   |                                                                                           |     |                   |
| 3                                                                                                                              | Analyse separately from the main time series                                                                                                                                                                                                                                                                                                                                                                                   |    |                                                                                       |   |                                                              |   |                                                           |   |                                                                                           |     |                   |
| 4                                                                                                                              | Include in the main time series but acknowledge them as anomalous or outlying data points                                                                                                                                                                                                                                                                                                                                      |    |                                                                                       |   |                                                              |   |                                                           |   |                                                                                           |     |                   |
| 999                                                                                                                            | Other [elaborate]                                                                                                                                                                                                                                                                                                                                                                                                              |    |                                                                                       |   |                                                              |   |                                                           |   |                                                                                           |     |                   |
| <b>Did the author specify whether there will be any subgroup analysis?</b>                                                     | multiple-choice <table border="1"> <tr> <td>99</td><td>No - author did not mention or clarify whether there will be any subgroup analysis</td></tr> <tr> <td>0</td><td>Yes - author specified there will be NO subgroup analysis</td></tr> <tr> <td>1</td><td>Yes - author specified there will be subgroup analysis</td></tr> </table>                                                                                        | 99 | No - author did not mention or clarify whether there will be any subgroup analysis    | 0 | Yes - author specified there will be NO subgroup analysis    | 1 | Yes - author specified there will be subgroup analysis    |   |                                                                                           |     |                   |
| 99                                                                                                                             | No - author did not mention or clarify whether there will be any subgroup analysis                                                                                                                                                                                                                                                                                                                                             |    |                                                                                       |   |                                                              |   |                                                           |   |                                                                                           |     |                   |
| 0                                                                                                                              | Yes - author specified there will be NO subgroup analysis                                                                                                                                                                                                                                                                                                                                                                      |    |                                                                                       |   |                                                              |   |                                                           |   |                                                                                           |     |                   |
| 1                                                                                                                              | Yes - author specified there will be subgroup analysis                                                                                                                                                                                                                                                                                                                                                                         |    |                                                                                       |   |                                                              |   |                                                           |   |                                                                                           |     |                   |
| <b>If so, summarise the basis of subgroup analyses</b><br>Examples: by type of intervention; by population; by type of control | text                                                                                                                                                                                                                                                                                                                                                                                                                           |    |                                                                                       |   |                                                              |   |                                                           |   |                                                                                           |     |                   |
| <b>Did the author specify whether there will be any sensitivity analysis?</b>                                                  | multiple-choice <table border="1"> <tr> <td>99</td><td>No - author did not mention or clarify whether there will be any sensitivity analysis</td></tr> <tr> <td>0</td><td>Yes - author specified there will be NO sensitivity analysis</td></tr> <tr> <td>1</td><td>Yes - author specified there will be sensitivity analysis</td></tr> </table>                                                                               | 99 | No - author did not mention or clarify whether there will be any sensitivity analysis | 0 | Yes - author specified there will be NO sensitivity analysis | 1 | Yes - author specified there will be sensitivity analysis |   |                                                                                           |     |                   |
| 99                                                                                                                             | No - author did not mention or clarify whether there will be any sensitivity analysis                                                                                                                                                                                                                                                                                                                                          |    |                                                                                       |   |                                                              |   |                                                           |   |                                                                                           |     |                   |
| 0                                                                                                                              | Yes - author specified there will be NO sensitivity analysis                                                                                                                                                                                                                                                                                                                                                                   |    |                                                                                       |   |                                                              |   |                                                           |   |                                                                                           |     |                   |
| 1                                                                                                                              | Yes - author specified there will be sensitivity analysis                                                                                                                                                                                                                                                                                                                                                                      |    |                                                                                       |   |                                                              |   |                                                           |   |                                                                                           |     |                   |
| <b>If so, summarise the basis of sensitivity analyses</b>                                                                      | text                                                                                                                                                                                                                                                                                                                                                                                                                           |    |                                                                                       |   |                                                              |   |                                                           |   |                                                                                           |     |                   |

| Question                                                                                                                                                                                                                                                                                                                                                                                                                                                                                                                                                                                                                                                                                                                                                                                                                                                                                                                   | Options                                                                                                                                                                                                                                                                                                                                                                                                                                           |    |                                                                               |   |                                                                                                                 |   |                                                                       |   |                      |     |                   |
|----------------------------------------------------------------------------------------------------------------------------------------------------------------------------------------------------------------------------------------------------------------------------------------------------------------------------------------------------------------------------------------------------------------------------------------------------------------------------------------------------------------------------------------------------------------------------------------------------------------------------------------------------------------------------------------------------------------------------------------------------------------------------------------------------------------------------------------------------------------------------------------------------------------------------|---------------------------------------------------------------------------------------------------------------------------------------------------------------------------------------------------------------------------------------------------------------------------------------------------------------------------------------------------------------------------------------------------------------------------------------------------|----|-------------------------------------------------------------------------------|---|-----------------------------------------------------------------------------------------------------------------|---|-----------------------------------------------------------------------|---|----------------------|-----|-------------------|
| <p><b>Did the author specify whether there will be a control series?</b><br/>Any of the following can be considered a control series:</p> <ul style="list-style-type: none"> <li>• location-based e.g. a control site that does not receive intervention</li> <li>• characteristic-based e.g. a cohort of a different age, a cohort without mental illness (for an intervention targeting mental illnesses)</li> <li>• behaviour-based e.g. a cohort who does not smoke (for an intervention targeting smoking)</li> <li>• historical cohort e.g. a cohort from the same period 1 year before the intervention cohort</li> <li>• control outcome e.g. an outcome that is not affected by the intervention</li> <li>• control time period e.g. using the same cohort that receive an intervention targeting drink-driving, but measured at a time period where drink-driving is not likely (such as on weekdays)</li> </ul> | <p>multiple-choice</p> <table border="1"> <tr> <td>99</td><td>No - author did not mention or clarify whether there will be a control series</td></tr> <tr> <td>0</td><td>Yes - author specified there will be NO control series</td></tr> <tr> <td>1</td><td>Yes - author specified there will be a control series</td></tr> </table>                                                                                                             | 99 | No - author did not mention or clarify whether there will be a control series | 0 | Yes - author specified there will be NO control series                                                          | 1 | Yes - author specified there will be a control series                 |   |                      |     |                   |
| 99                                                                                                                                                                                                                                                                                                                                                                                                                                                                                                                                                                                                                                                                                                                                                                                                                                                                                                                         | No - author did not mention or clarify whether there will be a control series                                                                                                                                                                                                                                                                                                                                                                     |    |                                                                               |   |                                                                                                                 |   |                                                                       |   |                      |     |                   |
| 0                                                                                                                                                                                                                                                                                                                                                                                                                                                                                                                                                                                                                                                                                                                                                                                                                                                                                                                          | Yes - author specified there will be NO control series                                                                                                                                                                                                                                                                                                                                                                                            |    |                                                                               |   |                                                                                                                 |   |                                                                       |   |                      |     |                   |
| 1                                                                                                                                                                                                                                                                                                                                                                                                                                                                                                                                                                                                                                                                                                                                                                                                                                                                                                                          | Yes - author specified there will be a control series                                                                                                                                                                                                                                                                                                                                                                                             |    |                                                                               |   |                                                                                                                 |   |                                                                       |   |                      |     |                   |
| <p><b>Briefly describe the control series</b><br/>Examples: type of control, how they are different from the intervention series</p>                                                                                                                                                                                                                                                                                                                                                                                                                                                                                                                                                                                                                                                                                                                                                                                       | <p>text</p>                                                                                                                                                                                                                                                                                                                                                                                                                                       |    |                                                                               |   |                                                                                                                 |   |                                                                       |   |                      |     |                   |
| <p><b>If so, what was the method used to compare between the intervention and control series?</b></p>                                                                                                                                                                                                                                                                                                                                                                                                                                                                                                                                                                                                                                                                                                                                                                                                                      | <p>checkbox</p> <table border="1"> <tr> <td>99</td><td>Cannot be determined</td></tr> <tr> <td>0</td><td>Presenting the numerical results for control series independently, without comparing to the intervention series</td></tr> <tr> <td>1</td><td>A single model that includes both the intervention and control series</td></tr> <tr> <td>2</td><td>Narrative comparison</td></tr> <tr> <td>999</td><td>Other [elaborate]</td></tr> </table> | 99 | Cannot be determined                                                          | 0 | Presenting the numerical results for control series independently, without comparing to the intervention series | 1 | A single model that includes both the intervention and control series | 2 | Narrative comparison | 999 | Other [elaborate] |
| 99                                                                                                                                                                                                                                                                                                                                                                                                                                                                                                                                                                                                                                                                                                                                                                                                                                                                                                                         | Cannot be determined                                                                                                                                                                                                                                                                                                                                                                                                                              |    |                                                                               |   |                                                                                                                 |   |                                                                       |   |                      |     |                   |
| 0                                                                                                                                                                                                                                                                                                                                                                                                                                                                                                                                                                                                                                                                                                                                                                                                                                                                                                                          | Presenting the numerical results for control series independently, without comparing to the intervention series                                                                                                                                                                                                                                                                                                                                   |    |                                                                               |   |                                                                                                                 |   |                                                                       |   |                      |     |                   |
| 1                                                                                                                                                                                                                                                                                                                                                                                                                                                                                                                                                                                                                                                                                                                                                                                                                                                                                                                          | A single model that includes both the intervention and control series                                                                                                                                                                                                                                                                                                                                                                             |    |                                                                               |   |                                                                                                                 |   |                                                                       |   |                      |     |                   |
| 2                                                                                                                                                                                                                                                                                                                                                                                                                                                                                                                                                                                                                                                                                                                                                                                                                                                                                                                          | Narrative comparison                                                                                                                                                                                                                                                                                                                                                                                                                              |    |                                                                               |   |                                                                                                                 |   |                                                                       |   |                      |     |                   |
| 999                                                                                                                                                                                                                                                                                                                                                                                                                                                                                                                                                                                                                                                                                                                                                                                                                                                                                                                        | Other [elaborate]                                                                                                                                                                                                                                                                                                                                                                                                                                 |    |                                                                               |   |                                                                                                                 |   |                                                                       |   |                      |     |                   |
| <b>Information from the results reports – Basic information</b>                                                                                                                                                                                                                                                                                                                                                                                                                                                                                                                                                                                                                                                                                                                                                                                                                                                            |                                                                                                                                                                                                                                                                                                                                                                                                                                                   |    |                                                                               |   |                                                                                                                 |   |                                                                       |   |                      |     |                   |
| <b>Title of results report</b>                                                                                                                                                                                                                                                                                                                                                                                                                                                                                                                                                                                                                                                                                                                                                                                                                                                                                             | text                                                                                                                                                                                                                                                                                                                                                                                                                                              |    |                                                                               |   |                                                                                                                 |   |                                                                       |   |                      |     |                   |
| <b>What is the name of the publishing journal?</b>                                                                                                                                                                                                                                                                                                                                                                                                                                                                                                                                                                                                                                                                                                                                                                                                                                                                         | text                                                                                                                                                                                                                                                                                                                                                                                                                                              |    |                                                                               |   |                                                                                                                 |   |                                                                       |   |                      |     |                   |
| <b>What is the source of funding?</b>                                                                                                                                                                                                                                                                                                                                                                                                                                                                                                                                                                                                                                                                                                                                                                                                                                                                                      | checkbox                                                                                                                                                                                                                                                                                                                                                                                                                                          |    |                                                                               |   |                                                                                                                 |   |                                                                       |   |                      |     |                   |

| Question                                                                                                                                                                                                                                                                                                                                                                                                                                                                                                                                                                                                                                                                                                                                                                                                                                                                        | Options                                                                                                                                                                                                                                                                                                          |    |                      |   |            |   |                                                 |   |          |     |                   |   |               |
|---------------------------------------------------------------------------------------------------------------------------------------------------------------------------------------------------------------------------------------------------------------------------------------------------------------------------------------------------------------------------------------------------------------------------------------------------------------------------------------------------------------------------------------------------------------------------------------------------------------------------------------------------------------------------------------------------------------------------------------------------------------------------------------------------------------------------------------------------------------------------------|------------------------------------------------------------------------------------------------------------------------------------------------------------------------------------------------------------------------------------------------------------------------------------------------------------------|----|----------------------|---|------------|---|-------------------------------------------------|---|----------|-----|-------------------|---|---------------|
| In-kind materials are also considered funding, and should be described in subsequent questions about the role of the funder.                                                                                                                                                                                                                                                                                                                                                                                                                                                                                                                                                                                                                                                                                                                                                    | <table border="1"> <tr><td>99</td><td>Cannot be determined</td></tr> <tr><td>0</td><td>No funding</td></tr> <tr><td>1</td><td>Non-industry (non-profit, academic, government)</td></tr> <tr><td>2</td><td>Industry</td></tr> <tr><td>999</td><td>Other [elaborate]</td></tr> </table>                            | 99 | Cannot be determined | 0 | No funding | 1 | Non-industry (non-profit, academic, government) | 2 | Industry | 999 | Other [elaborate] |   |               |
| 99                                                                                                                                                                                                                                                                                                                                                                                                                                                                                                                                                                                                                                                                                                                                                                                                                                                                              | Cannot be determined                                                                                                                                                                                                                                                                                             |    |                      |   |            |   |                                                 |   |          |     |                   |   |               |
| 0                                                                                                                                                                                                                                                                                                                                                                                                                                                                                                                                                                                                                                                                                                                                                                                                                                                                               | No funding                                                                                                                                                                                                                                                                                                       |    |                      |   |            |   |                                                 |   |          |     |                   |   |               |
| 1                                                                                                                                                                                                                                                                                                                                                                                                                                                                                                                                                                                                                                                                                                                                                                                                                                                                               | Non-industry (non-profit, academic, government)                                                                                                                                                                                                                                                                  |    |                      |   |            |   |                                                 |   |          |     |                   |   |               |
| 2                                                                                                                                                                                                                                                                                                                                                                                                                                                                                                                                                                                                                                                                                                                                                                                                                                                                               | Industry                                                                                                                                                                                                                                                                                                         |    |                      |   |            |   |                                                 |   |          |     |                   |   |               |
| 999                                                                                                                                                                                                                                                                                                                                                                                                                                                                                                                                                                                                                                                                                                                                                                                                                                                                             | Other [elaborate]                                                                                                                                                                                                                                                                                                |    |                      |   |            |   |                                                 |   |          |     |                   |   |               |
| <b>Briefly describe the intervention(s) or exposure(s) that constitute the interruption points.</b>                                                                                                                                                                                                                                                                                                                                                                                                                                                                                                                                                                                                                                                                                                                                                                             | text                                                                                                                                                                                                                                                                                                             |    |                      |   |            |   |                                                 |   |          |     |                   |   |               |
| <b>At which level did the interruption occur, or was delivered / implemented?</b> <ul style="list-style-type: none"> <li>Individual: The intervention is implemented in specific individuals without the intention to represent a geographical area.</li> <li>Unit-based or institutions: The intervention is implemented in one or more specific institutions, hospitals or departments within a hospital.</li> <li>Regional: The intervention is implemented in an entire district, state, province or region, or in a group of institutions purposely sampled to represent a region.</li> <li>National: The intervention is implemented in multiple districts/regions in a country, or the entire country, or in a group of institutions purposely sampled to represent a country.</li> <li>Multinational: The intervention is implemented in multiple countries.</li> </ul> | multiple-choice <table border="1"> <tr><td>99</td><td>Cannot be determined</td></tr> <tr><td>1</td><td>Individual</td></tr> <tr><td>2</td><td>Unit-based or institutional</td></tr> <tr><td>3</td><td>Regional</td></tr> <tr><td>4</td><td>National</td></tr> <tr><td>5</td><td>Multinational</td></tr> </table> | 99 | Cannot be determined | 1 | Individual | 2 | Unit-based or institutional                     | 3 | Regional | 4   | National          | 5 | Multinational |
| 99                                                                                                                                                                                                                                                                                                                                                                                                                                                                                                                                                                                                                                                                                                                                                                                                                                                                              | Cannot be determined                                                                                                                                                                                                                                                                                             |    |                      |   |            |   |                                                 |   |          |     |                   |   |               |
| 1                                                                                                                                                                                                                                                                                                                                                                                                                                                                                                                                                                                                                                                                                                                                                                                                                                                                               | Individual                                                                                                                                                                                                                                                                                                       |    |                      |   |            |   |                                                 |   |          |     |                   |   |               |
| 2                                                                                                                                                                                                                                                                                                                                                                                                                                                                                                                                                                                                                                                                                                                                                                                                                                                                               | Unit-based or institutional                                                                                                                                                                                                                                                                                      |    |                      |   |            |   |                                                 |   |          |     |                   |   |               |
| 3                                                                                                                                                                                                                                                                                                                                                                                                                                                                                                                                                                                                                                                                                                                                                                                                                                                                               | Regional                                                                                                                                                                                                                                                                                                         |    |                      |   |            |   |                                                 |   |          |     |                   |   |               |
| 4                                                                                                                                                                                                                                                                                                                                                                                                                                                                                                                                                                                                                                                                                                                                                                                                                                                                               | National                                                                                                                                                                                                                                                                                                         |    |                      |   |            |   |                                                 |   |          |     |                   |   |               |
| 5                                                                                                                                                                                                                                                                                                                                                                                                                                                                                                                                                                                                                                                                                                                                                                                                                                                                               | Multinational                                                                                                                                                                                                                                                                                                    |    |                      |   |            |   |                                                 |   |          |     |                   |   |               |
| <b>At which level was the effect of the interruption measured in this study?</b> <ul style="list-style-type: none"> <li>Individual: The intervention is implemented in specific individuals without the intention to represent a geographical area.</li> <li>Unit-based or institutions: The intervention is implemented in one or more specific institutions, hospitals or departments within a hospital.</li> <li>Regional: The intervention is implemented in an entire district, state, province or region, or in a group of institutions purposely sampled to represent a region.</li> </ul>                                                                                                                                                                                                                                                                               | multiple-choice <table border="1"> <tr><td>99</td><td>Cannot be determined</td></tr> <tr><td>1</td><td>Individual</td></tr> <tr><td>2</td><td>Unit-based or institutional</td></tr> <tr><td>3</td><td>Regional</td></tr> <tr><td>4</td><td>National</td></tr> </table>                                           | 99 | Cannot be determined | 1 | Individual | 2 | Unit-based or institutional                     | 3 | Regional | 4   | National          |   |               |
| 99                                                                                                                                                                                                                                                                                                                                                                                                                                                                                                                                                                                                                                                                                                                                                                                                                                                                              | Cannot be determined                                                                                                                                                                                                                                                                                             |    |                      |   |            |   |                                                 |   |          |     |                   |   |               |
| 1                                                                                                                                                                                                                                                                                                                                                                                                                                                                                                                                                                                                                                                                                                                                                                                                                                                                               | Individual                                                                                                                                                                                                                                                                                                       |    |                      |   |            |   |                                                 |   |          |     |                   |   |               |
| 2                                                                                                                                                                                                                                                                                                                                                                                                                                                                                                                                                                                                                                                                                                                                                                                                                                                                               | Unit-based or institutional                                                                                                                                                                                                                                                                                      |    |                      |   |            |   |                                                 |   |          |     |                   |   |               |
| 3                                                                                                                                                                                                                                                                                                                                                                                                                                                                                                                                                                                                                                                                                                                                                                                                                                                                               | Regional                                                                                                                                                                                                                                                                                                         |    |                      |   |            |   |                                                 |   |          |     |                   |   |               |
| 4                                                                                                                                                                                                                                                                                                                                                                                                                                                                                                                                                                                                                                                                                                                                                                                                                                                                               | National                                                                                                                                                                                                                                                                                                         |    |                      |   |            |   |                                                 |   |          |     |                   |   |               |

| Question                                                                                                                                                                                                                                                                                                                                                                                                                                                                                                                         | Options                                                                                                                                                                        |    |                      |   |               |   |             |
|----------------------------------------------------------------------------------------------------------------------------------------------------------------------------------------------------------------------------------------------------------------------------------------------------------------------------------------------------------------------------------------------------------------------------------------------------------------------------------------------------------------------------------|--------------------------------------------------------------------------------------------------------------------------------------------------------------------------------|----|----------------------|---|---------------|---|-------------|
| <ul style="list-style-type: none"> <li>National: The intervention is implemented in multiple districts/regions in a country, or the entire country, or in a group of institutions purposely sampled to represent a country.</li> <li>Multinational: The intervention is implemented in multiple countries.</li> </ul>                                                                                                                                                                                                            | <table border="1"> <tr> <td>5</td><td>Multinational</td></tr> </table>                                                                                                         | 5  | Multinational        |   |               |   |             |
| 5                                                                                                                                                                                                                                                                                                                                                                                                                                                                                                                                | Multinational                                                                                                                                                                  |    |                      |   |               |   |             |
| <b>Is this an ITS study by design?</b><br>The study needs to: (1) have the minimum of 3 data points for at least 2 segments; and (2) use a model that is consistent with ITS analysis methods (e.g. for a time series of monthly data, the model needs to have a continuous parameter that represents number of months before and after the interruption).                                                                                                                                                                       | multiple-choice<br><table border="1"> <tr> <td>0</td><td>No</td></tr> <tr> <td>1</td><td>Yes</td></tr> </table>                                                                | 0  | No                   | 1 | Yes           |   |             |
| 0                                                                                                                                                                                                                                                                                                                                                                                                                                                                                                                                | No                                                                                                                                                                             |    |                      |   |               |   |             |
| 1                                                                                                                                                                                                                                                                                                                                                                                                                                                                                                                                | Yes                                                                                                                                                                            |    |                      |   |               |   |             |
| <b>Was the data collected retrospectively, prospectively, or both?</b> <ul style="list-style-type: none"> <li>Retrospective: Data was already available or collected at the time of the submission of the protocol</li> <li>Prospective: Data was collected after the submission of the protocol</li> </ul> Use your best judgment based on:<br>(1) the end date of the data collection period relative to the protocol's submission date, or if not available<br>(2) the timing of the intervention, and<br>(3) authors' words. | checkbox<br><table border="1"> <tr> <td>99</td><td>Cannot be determined</td></tr> <tr> <td>1</td><td>Retrospective</td></tr> <tr> <td>2</td><td>Prospective</td></tr> </table> | 99 | Cannot be determined | 1 | Retrospective | 2 | Prospective |
| 99                                                                                                                                                                                                                                                                                                                                                                                                                                                                                                                               | Cannot be determined                                                                                                                                                           |    |                      |   |               |   |             |
| 1                                                                                                                                                                                                                                                                                                                                                                                                                                                                                                                                | Retrospective                                                                                                                                                                  |    |                      |   |               |   |             |
| 2                                                                                                                                                                                                                                                                                                                                                                                                                                                                                                                                | Prospective                                                                                                                                                                    |    |                      |   |               |   |             |
| <b>Information from the results reports – Study design and Analysis methods</b>                                                                                                                                                                                                                                                                                                                                                                                                                                                  |                                                                                                                                                                                |    |                      |   |               |   |             |
| <b>Summarise the primary research question(s) for the ITS analysis.</b><br>Examples <ul style="list-style-type: none"> <li>What are the effects of an antibiotic stewardship programme in a hospital aimed at reducing unnecessary antibiotic prescriptions, compared to no intervention?</li> <li>What are the effects of a family planning intervention on pregnant women in intervention suburbs, compared to matched control suburbs?</li> </ul>                                                                             | text                                                                                                                                                                           |    |                      |   |               |   |             |
| <b>What were the eligibility criteria for participants/sites to be included in the ITS?</b>                                                                                                                                                                                                                                                                                                                                                                                                                                      | text                                                                                                                                                                           |    |                      |   |               |   |             |
| <b>Describe the data source(s)</b><br>Examples: name of data source, how it was collected (e.g. EHR, survey, audit reports) and any other important info                                                                                                                                                                                                                                                                                                                                                                         | text                                                                                                                                                                           |    |                      |   |               |   |             |

| Question                                                                                                                                                                                                                                                                                                                                                                                                                                                                                                                                                                  | Options                                                                                                                                                                                                 |    |                      |   |                         |   |                        |
|---------------------------------------------------------------------------------------------------------------------------------------------------------------------------------------------------------------------------------------------------------------------------------------------------------------------------------------------------------------------------------------------------------------------------------------------------------------------------------------------------------------------------------------------------------------------------|---------------------------------------------------------------------------------------------------------------------------------------------------------------------------------------------------------|----|----------------------|---|-------------------------|---|------------------------|
| <b>Was the intervention implemented at a specific time or over a period of time?</b>                                                                                                                                                                                                                                                                                                                                                                                                                                                                                      | multiple-choice <table border="1"> <tr> <td>99</td> <td>Cannot be determined</td> </tr> <tr> <td>1</td> <td>At a specific time</td> </tr> <tr> <td>2</td> <td>Over a period of time</td> </tr> </table> | 99 | Cannot be determined | 1 | At a specific time      | 2 | Over a period of time  |
| 99                                                                                                                                                                                                                                                                                                                                                                                                                                                                                                                                                                        | Cannot be determined                                                                                                                                                                                    |    |                      |   |                         |   |                        |
| 1                                                                                                                                                                                                                                                                                                                                                                                                                                                                                                                                                                         | At a specific time                                                                                                                                                                                      |    |                      |   |                         |   |                        |
| 2                                                                                                                                                                                                                                                                                                                                                                                                                                                                                                                                                                         | Over a period of time                                                                                                                                                                                   |    |                      |   |                         |   |                        |
| <b>Outline and describe all the segments in the time series</b><br>Use S1, S2, S3, etc. to label the segments. For each segment, state their start / end time and number of data points.<br><br>If there are multiple time series with unclear/overlapping time points (such as multiple sites with staggered rollout), describe one representative time series and add a note to highlight that there are other similar time series for multiple sites.<br><br>Example:<br>S1: Dec 2010-May 2011 (6 dp)<br>S2: Jun 2011-May 2012 (12 dp)<br>S3: Jun 2012-Dec 2012 (6 dp) | text                                                                                                                                                                                                    |    |                      |   |                         |   |                        |
| <b>What was number of segments?</b><br>Inclusive of intervention segment (S2) even when S2 has no data point                                                                                                                                                                                                                                                                                                                                                                                                                                                              | text                                                                                                                                                                                                    |    |                      |   |                         |   |                        |
| <b>Could the number of data point per segment be determined?</b>                                                                                                                                                                                                                                                                                                                                                                                                                                                                                                          | multiple-choice <table border="1"> <tr> <td>0</td> <td>No</td> </tr> <tr> <td>1</td> <td>Yes - for some segments</td> </tr> <tr> <td>2</td> <td>Yes - for all segments</td> </tr> </table>              | 0  | No                   | 1 | Yes - for some segments | 2 | Yes - for all segments |
| 0                                                                                                                                                                                                                                                                                                                                                                                                                                                                                                                                                                         | No                                                                                                                                                                                                      |    |                      |   |                         |   |                        |
| 1                                                                                                                                                                                                                                                                                                                                                                                                                                                                                                                                                                         | Yes - for some segments                                                                                                                                                                                 |    |                      |   |                         |   |                        |
| 2                                                                                                                                                                                                                                                                                                                                                                                                                                                                                                                                                                         | Yes - for all segments                                                                                                                                                                                  |    |                      |   |                         |   |                        |
| <b>Could the start/end dates of each segment be determined?</b>                                                                                                                                                                                                                                                                                                                                                                                                                                                                                                           | multiple-choice <table border="1"> <tr> <td>0</td> <td>No</td> </tr> <tr> <td>1</td> <td>Yes - for some segments</td> </tr> <tr> <td>2</td> <td>Yes - for all segments</td> </tr> </table>              | 0  | No                   | 1 | Yes - for some segments | 2 | Yes - for all segments |
| 0                                                                                                                                                                                                                                                                                                                                                                                                                                                                                                                                                                         | No                                                                                                                                                                                                      |    |                      |   |                         |   |                        |
| 1                                                                                                                                                                                                                                                                                                                                                                                                                                                                                                                                                                         | Yes - for some segments                                                                                                                                                                                 |    |                      |   |                         |   |                        |
| 2                                                                                                                                                                                                                                                                                                                                                                                                                                                                                                                                                                         | Yes - for all segments                                                                                                                                                                                  |    |                      |   |                         |   |                        |

| Question                                                                                                                                                                                                                                                                                                                                                                                                                                                                                                                                                                              | Options                                                                                                                                                                                                                                                                                                                                        |    |                      |   |                     |   |                        |   |                                   |   |                                         |
|---------------------------------------------------------------------------------------------------------------------------------------------------------------------------------------------------------------------------------------------------------------------------------------------------------------------------------------------------------------------------------------------------------------------------------------------------------------------------------------------------------------------------------------------------------------------------------------|------------------------------------------------------------------------------------------------------------------------------------------------------------------------------------------------------------------------------------------------------------------------------------------------------------------------------------------------|----|----------------------|---|---------------------|---|------------------------|---|-----------------------------------|---|-----------------------------------------|
| <p><b>What was the number of data points in the time series after aggregation?</b><br/> This refers to the time series where data has been aggregated. This can be calculated based on the date range of the time series and the time intervals for aggregation.<br/> Ignore sample size calculation.<br/> If there are multiple series (e.g. multiple sites, multiple models) and the no. of data points is known for all of them, calculate a mean. If the number of data points is missing for some, choose the longest series where the no. of data points can be determined.</p> | text                                                                                                                                                                                                                                                                                                                                           |    |                      |   |                     |   |                        |   |                                   |   |                                         |
| <p><b>Describe the impact model used to fit the time series</b><br/> Copy and paste all relevant descriptions of the model from the article (note page no.). You should also indicate any other important details that are not captured in the subsequent questions.</p>                                                                                                                                                                                                                                                                                                              | text                                                                                                                                                                                                                                                                                                                                           |    |                      |   |                     |   |                        |   |                                   |   |                                         |
| <p><b>How was the intervention modelled?</b></p> <ul style="list-style-type: none"> <li>Not modelled at all: the data points associated with the intervention period are excluded from the analysis (no trend line]</li> </ul>                                                                                                                                                                                                                                                                                                                                                        | <p>multiple-choice</p> <table border="1"> <tr> <td>99</td><td>Cannot be determined</td></tr> <tr> <td>0</td><td>Not modelled at all</td></tr> <tr> <td>1</td><td>As a single time point</td></tr> <tr> <td>2</td><td>As a separate intervention period</td></tr> <tr> <td>3</td><td>As part of the post-intervention period</td></tr> </table> | 99 | Cannot be determined | 0 | Not modelled at all | 1 | As a single time point | 2 | As a separate intervention period | 3 | As part of the post-intervention period |
| 99                                                                                                                                                                                                                                                                                                                                                                                                                                                                                                                                                                                    | Cannot be determined                                                                                                                                                                                                                                                                                                                           |    |                      |   |                     |   |                        |   |                                   |   |                                         |
| 0                                                                                                                                                                                                                                                                                                                                                                                                                                                                                                                                                                                     | Not modelled at all                                                                                                                                                                                                                                                                                                                            |    |                      |   |                     |   |                        |   |                                   |   |                                         |
| 1                                                                                                                                                                                                                                                                                                                                                                                                                                                                                                                                                                                     | As a single time point                                                                                                                                                                                                                                                                                                                         |    |                      |   |                     |   |                        |   |                                   |   |                                         |
| 2                                                                                                                                                                                                                                                                                                                                                                                                                                                                                                                                                                                     | As a separate intervention period                                                                                                                                                                                                                                                                                                              |    |                      |   |                     |   |                        |   |                                   |   |                                         |
| 3                                                                                                                                                                                                                                                                                                                                                                                                                                                                                                                                                                                     | As part of the post-intervention period                                                                                                                                                                                                                                                                                                        |    |                      |   |                     |   |                        |   |                                   |   |                                         |
| <p><b>Outline and describe all the segments in the time series, as how they appear in the model</b><br/> Use S1, S2, S3, etc. to label the segments. For each segment, state their start / end time and number of data points.</p> <p>If there are multiple time series with unclear/overlapping time points (such as multiple sites with staggered rollout), describe one representative time series and add a note to highlight that there are other similar time series for multiple sites.</p>                                                                                    | text                                                                                                                                                                                                                                                                                                                                           |    |                      |   |                     |   |                        |   |                                   |   |                                         |



| Question                                                                                                                                                                                                                                                                                                                                                                                                                                                                                                                                                                                               | Options                                                                                                                                                                              |   |     |   |                         |   |                        |
|--------------------------------------------------------------------------------------------------------------------------------------------------------------------------------------------------------------------------------------------------------------------------------------------------------------------------------------------------------------------------------------------------------------------------------------------------------------------------------------------------------------------------------------------------------------------------------------------------------|--------------------------------------------------------------------------------------------------------------------------------------------------------------------------------------|---|-----|---|-------------------------|---|------------------------|
| <p>Example:<br/> S1: Dec 2010-May 2011 (6 dp)<br/> S2: Jun 2011-May 2012 (12 dp)<br/> S3: Jun 2012-Dec 2012 (6 dp)</p>                                                                                                                                                                                                                                                                                                                                                                                                                                                                                 |                                                                                                                                                                                      |   |     |   |                         |   |                        |
| <b>What was the number of segments model?</b>                                                                                                                                                                                                                                                                                                                                                                                                                                                                                                                                                          | text                                                                                                                                                                                 |   |     |   |                         |   |                        |
| <b>Could the number of data point per segment be determined from the model?</b>                                                                                                                                                                                                                                                                                                                                                                                                                                                                                                                        | multiple-choice <table border="1"> <tr> <td>0</td><td>No</td></tr> <tr> <td>1</td><td>Yes - for some segments</td></tr> <tr> <td>2</td><td>Yes - for all segments</td></tr> </table> | 0 | No  | 1 | Yes - for some segments | 2 | Yes - for all segments |
| 0                                                                                                                                                                                                                                                                                                                                                                                                                                                                                                                                                                                                      | No                                                                                                                                                                                   |   |     |   |                         |   |                        |
| 1                                                                                                                                                                                                                                                                                                                                                                                                                                                                                                                                                                                                      | Yes - for some segments                                                                                                                                                              |   |     |   |                         |   |                        |
| 2                                                                                                                                                                                                                                                                                                                                                                                                                                                                                                                                                                                                      | Yes - for all segments                                                                                                                                                               |   |     |   |                         |   |                        |
| <b>Could the start/end dates of each segment be determined from the model?</b>                                                                                                                                                                                                                                                                                                                                                                                                                                                                                                                         | multiple-choice <table border="1"> <tr> <td>0</td><td>No</td></tr> <tr> <td>1</td><td>Yes - for some segments</td></tr> <tr> <td>2</td><td>Yes - for all segments</td></tr> </table> | 0 | No  | 1 | Yes - for some segments | 2 | Yes - for all segments |
| 0                                                                                                                                                                                                                                                                                                                                                                                                                                                                                                                                                                                                      | No                                                                                                                                                                                   |   |     |   |                         |   |                        |
| 1                                                                                                                                                                                                                                                                                                                                                                                                                                                                                                                                                                                                      | Yes - for some segments                                                                                                                                                              |   |     |   |                         |   |                        |
| 2                                                                                                                                                                                                                                                                                                                                                                                                                                                                                                                                                                                                      | Yes - for all segments                                                                                                                                                               |   |     |   |                         |   |                        |
| <b>Which segments in the model were compared to address the primary research question (PRQ)?</b><br>Examples: <ul style="list-style-type: none"> <li>• The PRQ is comparing post- vs pre-interruption segments of the intervention series only → S3 vs S2; S2 vs S1</li> <li>• The PRQ is comparing the (implementation + post-implementation segments) vs pre-interruption segments of the intervention series only → (S2+S3) vs S1</li> <li>• The PRQ is comparing pre- vs post-interruption change btw intervention and control series → (S3 vs S1, intervention) vs (S3 vs S1, control)</li> </ul> | text                                                                                                                                                                                 |   |     |   |                         |   |                        |
| <b>Did the authors provide the mathematical equation representing the model?</b>                                                                                                                                                                                                                                                                                                                                                                                                                                                                                                                       | multiple-choice <table border="1"> <tr> <td>1</td><td>Yes</td></tr> <tr> <td>0</td><td>No</td></tr> </table>                                                                         | 1 | Yes | 0 | No                      |   |                        |
| 1                                                                                                                                                                                                                                                                                                                                                                                                                                                                                                                                                                                                      | Yes                                                                                                                                                                                  |   |     |   |                         |   |                        |
| 0                                                                                                                                                                                                                                                                                                                                                                                                                                                                                                                                                                                                      | No                                                                                                                                                                                   |   |     |   |                         |   |                        |

| Question                                                                                         | Options                                                                                                                                                                                                                                                                                                                                                                                                                                                                                                                                                                                                                                                                                                                                                                                                                                                                                                                                                                                                                                                                                                                                                                                                                                                  |    |                      |   |              |   |              |   |                                                           |   |                                                                    |   |                                                         |    |                                      |   |           |   |                |   |          |    |                              |
|--------------------------------------------------------------------------------------------------|----------------------------------------------------------------------------------------------------------------------------------------------------------------------------------------------------------------------------------------------------------------------------------------------------------------------------------------------------------------------------------------------------------------------------------------------------------------------------------------------------------------------------------------------------------------------------------------------------------------------------------------------------------------------------------------------------------------------------------------------------------------------------------------------------------------------------------------------------------------------------------------------------------------------------------------------------------------------------------------------------------------------------------------------------------------------------------------------------------------------------------------------------------------------------------------------------------------------------------------------------------|----|----------------------|---|--------------|---|--------------|---|-----------------------------------------------------------|---|--------------------------------------------------------------------|---|---------------------------------------------------------|----|--------------------------------------|---|-----------|---|----------------|---|----------|----|------------------------------|
| <p><b>Which effect estimate was calculated and reported?</b></p>                                 | <p>checkbox</p> <table border="1"> <tr> <td data-bbox="1162 300 1211 347">0</td> <td data-bbox="1211 300 1816 347">No result</td> </tr> <tr> <td data-bbox="1162 347 1211 395">1</td> <td data-bbox="1211 347 1816 395">Level change</td> </tr> <tr> <td data-bbox="1162 395 1211 443">2</td> <td data-bbox="1211 395 1816 443">Slope change</td> </tr> <tr> <td data-bbox="1162 443 1211 531">3</td> <td data-bbox="1211 443 1816 531">Other known effect estimate from ITS analysis [elaborate]</td> </tr> <tr> <td data-bbox="1162 531 1211 619">4</td> <td data-bbox="1211 531 1816 619">Other unidentifiable effect estimate from ITS analysis [elaborate]</td> </tr> <tr> <td data-bbox="1162 619 1211 699">5</td> <td data-bbox="1211 619 1816 699">Other effect estimate from non-ITS analysis [elaborate]</td> </tr> <tr> <td data-bbox="1162 699 1211 746">99</td> <td data-bbox="1211 699 1816 746">Unclear what the effect estimate was</td> </tr> </table>                                                                                                                                                                                                                                                                                  | 0  | No result            | 1 | Level change | 2 | Slope change | 3 | Other known effect estimate from ITS analysis [elaborate] | 4 | Other unidentifiable effect estimate from ITS analysis [elaborate] | 5 | Other effect estimate from non-ITS analysis [elaborate] | 99 | Unclear what the effect estimate was |   |           |   |                |   |          |    |                              |
| 0                                                                                                | No result                                                                                                                                                                                                                                                                                                                                                                                                                                                                                                                                                                                                                                                                                                                                                                                                                                                                                                                                                                                                                                                                                                                                                                                                                                                |    |                      |   |              |   |              |   |                                                           |   |                                                                    |   |                                                         |    |                                      |   |           |   |                |   |          |    |                              |
| 1                                                                                                | Level change                                                                                                                                                                                                                                                                                                                                                                                                                                                                                                                                                                                                                                                                                                                                                                                                                                                                                                                                                                                                                                                                                                                                                                                                                                             |    |                      |   |              |   |              |   |                                                           |   |                                                                    |   |                                                         |    |                                      |   |           |   |                |   |          |    |                              |
| 2                                                                                                | Slope change                                                                                                                                                                                                                                                                                                                                                                                                                                                                                                                                                                                                                                                                                                                                                                                                                                                                                                                                                                                                                                                                                                                                                                                                                                             |    |                      |   |              |   |              |   |                                                           |   |                                                                    |   |                                                         |    |                                      |   |           |   |                |   |          |    |                              |
| 3                                                                                                | Other known effect estimate from ITS analysis [elaborate]                                                                                                                                                                                                                                                                                                                                                                                                                                                                                                                                                                                                                                                                                                                                                                                                                                                                                                                                                                                                                                                                                                                                                                                                |    |                      |   |              |   |              |   |                                                           |   |                                                                    |   |                                                         |    |                                      |   |           |   |                |   |          |    |                              |
| 4                                                                                                | Other unidentifiable effect estimate from ITS analysis [elaborate]                                                                                                                                                                                                                                                                                                                                                                                                                                                                                                                                                                                                                                                                                                                                                                                                                                                                                                                                                                                                                                                                                                                                                                                       |    |                      |   |              |   |              |   |                                                           |   |                                                                    |   |                                                         |    |                                      |   |           |   |                |   |          |    |                              |
| 5                                                                                                | Other effect estimate from non-ITS analysis [elaborate]                                                                                                                                                                                                                                                                                                                                                                                                                                                                                                                                                                                                                                                                                                                                                                                                                                                                                                                                                                                                                                                                                                                                                                                                  |    |                      |   |              |   |              |   |                                                           |   |                                                                    |   |                                                         |    |                                      |   |           |   |                |   |          |    |                              |
| 99                                                                                               | Unclear what the effect estimate was                                                                                                                                                                                                                                                                                                                                                                                                                                                                                                                                                                                                                                                                                                                                                                                                                                                                                                                                                                                                                                                                                                                                                                                                                     |    |                      |   |              |   |              |   |                                                           |   |                                                                    |   |                                                         |    |                                      |   |           |   |                |   |          |    |                              |
| <p><b>What was the time interval(s) that outcomes were aggregated at in the time series?</b></p> | <p>checkbox</p> <table border="1"> <tr> <td data-bbox="1162 802 1211 850">99</td> <td data-bbox="1211 802 1592 850">Cannot be determined</td> </tr> <tr> <td data-bbox="1162 850 1211 898">1</td> <td data-bbox="1211 850 1592 898">Every minute</td> </tr> <tr> <td data-bbox="1162 898 1211 946">2</td> <td data-bbox="1211 898 1592 946">Hourly</td> </tr> <tr> <td data-bbox="1162 946 1211 994">3</td> <td data-bbox="1211 946 1592 994">Daily</td> </tr> <tr> <td data-bbox="1162 994 1211 1042">4</td> <td data-bbox="1211 994 1592 1042">Weekly</td> </tr> <tr> <td data-bbox="1162 1042 1211 1090">5</td> <td data-bbox="1211 1042 1592 1090">Two-weekly</td> </tr> <tr> <td data-bbox="1162 1090 1211 1137">6</td> <td data-bbox="1211 1090 1592 1137">Monthly</td> </tr> <tr> <td data-bbox="1162 1137 1211 1185">7</td> <td data-bbox="1211 1137 1592 1185">Quarterly</td> </tr> <tr> <td data-bbox="1162 1185 1211 1233">8</td> <td data-bbox="1211 1185 1592 1233">Every 6 months</td> </tr> <tr> <td data-bbox="1162 1233 1211 1281">9</td> <td data-bbox="1211 1233 1592 1281">Annually</td> </tr> <tr> <td data-bbox="1162 1281 1211 1329">10</td> <td data-bbox="1211 1281 1592 1329">Two periods (pre- and post-)</td> </tr> </table> | 99 | Cannot be determined | 1 | Every minute | 2 | Hourly       | 3 | Daily                                                     | 4 | Weekly                                                             | 5 | Two-weekly                                              | 6  | Monthly                              | 7 | Quarterly | 8 | Every 6 months | 9 | Annually | 10 | Two periods (pre- and post-) |
| 99                                                                                               | Cannot be determined                                                                                                                                                                                                                                                                                                                                                                                                                                                                                                                                                                                                                                                                                                                                                                                                                                                                                                                                                                                                                                                                                                                                                                                                                                     |    |                      |   |              |   |              |   |                                                           |   |                                                                    |   |                                                         |    |                                      |   |           |   |                |   |          |    |                              |
| 1                                                                                                | Every minute                                                                                                                                                                                                                                                                                                                                                                                                                                                                                                                                                                                                                                                                                                                                                                                                                                                                                                                                                                                                                                                                                                                                                                                                                                             |    |                      |   |              |   |              |   |                                                           |   |                                                                    |   |                                                         |    |                                      |   |           |   |                |   |          |    |                              |
| 2                                                                                                | Hourly                                                                                                                                                                                                                                                                                                                                                                                                                                                                                                                                                                                                                                                                                                                                                                                                                                                                                                                                                                                                                                                                                                                                                                                                                                                   |    |                      |   |              |   |              |   |                                                           |   |                                                                    |   |                                                         |    |                                      |   |           |   |                |   |          |    |                              |
| 3                                                                                                | Daily                                                                                                                                                                                                                                                                                                                                                                                                                                                                                                                                                                                                                                                                                                                                                                                                                                                                                                                                                                                                                                                                                                                                                                                                                                                    |    |                      |   |              |   |              |   |                                                           |   |                                                                    |   |                                                         |    |                                      |   |           |   |                |   |          |    |                              |
| 4                                                                                                | Weekly                                                                                                                                                                                                                                                                                                                                                                                                                                                                                                                                                                                                                                                                                                                                                                                                                                                                                                                                                                                                                                                                                                                                                                                                                                                   |    |                      |   |              |   |              |   |                                                           |   |                                                                    |   |                                                         |    |                                      |   |           |   |                |   |          |    |                              |
| 5                                                                                                | Two-weekly                                                                                                                                                                                                                                                                                                                                                                                                                                                                                                                                                                                                                                                                                                                                                                                                                                                                                                                                                                                                                                                                                                                                                                                                                                               |    |                      |   |              |   |              |   |                                                           |   |                                                                    |   |                                                         |    |                                      |   |           |   |                |   |          |    |                              |
| 6                                                                                                | Monthly                                                                                                                                                                                                                                                                                                                                                                                                                                                                                                                                                                                                                                                                                                                                                                                                                                                                                                                                                                                                                                                                                                                                                                                                                                                  |    |                      |   |              |   |              |   |                                                           |   |                                                                    |   |                                                         |    |                                      |   |           |   |                |   |          |    |                              |
| 7                                                                                                | Quarterly                                                                                                                                                                                                                                                                                                                                                                                                                                                                                                                                                                                                                                                                                                                                                                                                                                                                                                                                                                                                                                                                                                                                                                                                                                                |    |                      |   |              |   |              |   |                                                           |   |                                                                    |   |                                                         |    |                                      |   |           |   |                |   |          |    |                              |
| 8                                                                                                | Every 6 months                                                                                                                                                                                                                                                                                                                                                                                                                                                                                                                                                                                                                                                                                                                                                                                                                                                                                                                                                                                                                                                                                                                                                                                                                                           |    |                      |   |              |   |              |   |                                                           |   |                                                                    |   |                                                         |    |                                      |   |           |   |                |   |          |    |                              |
| 9                                                                                                | Annually                                                                                                                                                                                                                                                                                                                                                                                                                                                                                                                                                                                                                                                                                                                                                                                                                                                                                                                                                                                                                                                                                                                                                                                                                                                 |    |                      |   |              |   |              |   |                                                           |   |                                                                    |   |                                                         |    |                                      |   |           |   |                |   |          |    |                              |
| 10                                                                                               | Two periods (pre- and post-)                                                                                                                                                                                                                                                                                                                                                                                                                                                                                                                                                                                                                                                                                                                                                                                                                                                                                                                                                                                                                                                                                                                                                                                                                             |    |                      |   |              |   |              |   |                                                           |   |                                                                    |   |                                                         |    |                                      |   |           |   |                |   |          |    |                              |

| Question                                                                                                                                                                                                                                                                                                                                                | Options                                                                                                                                                                                                                                                                                                                                                                                                                                                                                                                                                                                                                                                              |     |                      |   |                                                  |   |                   |   |                     |   |                     |   |                    |   |      |   |     |   |                              |   |                   |    |                                    |     |                   |
|---------------------------------------------------------------------------------------------------------------------------------------------------------------------------------------------------------------------------------------------------------------------------------------------------------------------------------------------------------|----------------------------------------------------------------------------------------------------------------------------------------------------------------------------------------------------------------------------------------------------------------------------------------------------------------------------------------------------------------------------------------------------------------------------------------------------------------------------------------------------------------------------------------------------------------------------------------------------------------------------------------------------------------------|-----|----------------------|---|--------------------------------------------------|---|-------------------|---|---------------------|---|---------------------|---|--------------------|---|------|---|-----|---|------------------------------|---|-------------------|----|------------------------------------|-----|-------------------|
|                                                                                                                                                                                                                                                                                                                                                         | <table border="1"> <tr> <td>999</td><td>Other [elaborate]</td></tr> </table>                                                                                                                                                                                                                                                                                                                                                                                                                                                                                                                                                                                         | 999 | Other [elaborate]    |   |                                                  |   |                   |   |                     |   |                     |   |                    |   |      |   |     |   |                              |   |                   |    |                                    |     |                   |
| 999                                                                                                                                                                                                                                                                                                                                                     | Other [elaborate]                                                                                                                                                                                                                                                                                                                                                                                                                                                                                                                                                                                                                                                    |     |                      |   |                                                  |   |                   |   |                     |   |                     |   |                    |   |      |   |     |   |                              |   |                   |    |                                    |     |                   |
| <b>Describe the statistical methods used to analyse the ITS</b><br>Copy and paste all relevant descriptions of the statistical methods from the article (note page no.). You should also add any important details that are not captured in the subsequent questions.                                                                                   | text                                                                                                                                                                                                                                                                                                                                                                                                                                                                                                                                                                                                                                                                 |     |                      |   |                                                  |   |                   |   |                     |   |                     |   |                    |   |      |   |     |   |                              |   |                   |    |                                    |     |                   |
| <b>What was the statistical method used to estimate the difference between the pre- and post-interruption segments?</b><br>Some options (e.g. linear/logistic regression) may encompass both ITS and non-ITS methods. The latter is when there is regression without a continuous time variable, only a binary indicator variable for pre-post periods. | checkbox <table border="1"> <tr> <td>99</td><td>Cannot be determined</td></tr> <tr> <td>1</td><td>Autoregressive integrated moving average (ARIMA)</td></tr> <tr> <td>2</td><td>Linear regression</td></tr> <tr> <td>3</td><td>Logistic regression</td></tr> <tr> <td>4</td><td>Binomial regression</td></tr> <tr> <td>5</td><td>Poisson regression</td></tr> <tr> <td>6</td><td>GLMM</td></tr> <tr> <td>7</td><td>GEE</td></tr> <tr> <td>8</td><td>Negative binomial regression</td></tr> <tr> <td>9</td><td>GLM (unspecified)</td></tr> <tr> <td>10</td><td>Segmented regression (unspecified)</td></tr> <tr> <td>999</td><td>Other [elaborate]</td></tr> </table> | 99  | Cannot be determined | 1 | Autoregressive integrated moving average (ARIMA) | 2 | Linear regression | 3 | Logistic regression | 4 | Binomial regression | 5 | Poisson regression | 6 | GLMM | 7 | GEE | 8 | Negative binomial regression | 9 | GLM (unspecified) | 10 | Segmented regression (unspecified) | 999 | Other [elaborate] |
| 99                                                                                                                                                                                                                                                                                                                                                      | Cannot be determined                                                                                                                                                                                                                                                                                                                                                                                                                                                                                                                                                                                                                                                 |     |                      |   |                                                  |   |                   |   |                     |   |                     |   |                    |   |      |   |     |   |                              |   |                   |    |                                    |     |                   |
| 1                                                                                                                                                                                                                                                                                                                                                       | Autoregressive integrated moving average (ARIMA)                                                                                                                                                                                                                                                                                                                                                                                                                                                                                                                                                                                                                     |     |                      |   |                                                  |   |                   |   |                     |   |                     |   |                    |   |      |   |     |   |                              |   |                   |    |                                    |     |                   |
| 2                                                                                                                                                                                                                                                                                                                                                       | Linear regression                                                                                                                                                                                                                                                                                                                                                                                                                                                                                                                                                                                                                                                    |     |                      |   |                                                  |   |                   |   |                     |   |                     |   |                    |   |      |   |     |   |                              |   |                   |    |                                    |     |                   |
| 3                                                                                                                                                                                                                                                                                                                                                       | Logistic regression                                                                                                                                                                                                                                                                                                                                                                                                                                                                                                                                                                                                                                                  |     |                      |   |                                                  |   |                   |   |                     |   |                     |   |                    |   |      |   |     |   |                              |   |                   |    |                                    |     |                   |
| 4                                                                                                                                                                                                                                                                                                                                                       | Binomial regression                                                                                                                                                                                                                                                                                                                                                                                                                                                                                                                                                                                                                                                  |     |                      |   |                                                  |   |                   |   |                     |   |                     |   |                    |   |      |   |     |   |                              |   |                   |    |                                    |     |                   |
| 5                                                                                                                                                                                                                                                                                                                                                       | Poisson regression                                                                                                                                                                                                                                                                                                                                                                                                                                                                                                                                                                                                                                                   |     |                      |   |                                                  |   |                   |   |                     |   |                     |   |                    |   |      |   |     |   |                              |   |                   |    |                                    |     |                   |
| 6                                                                                                                                                                                                                                                                                                                                                       | GLMM                                                                                                                                                                                                                                                                                                                                                                                                                                                                                                                                                                                                                                                                 |     |                      |   |                                                  |   |                   |   |                     |   |                     |   |                    |   |      |   |     |   |                              |   |                   |    |                                    |     |                   |
| 7                                                                                                                                                                                                                                                                                                                                                       | GEE                                                                                                                                                                                                                                                                                                                                                                                                                                                                                                                                                                                                                                                                  |     |                      |   |                                                  |   |                   |   |                     |   |                     |   |                    |   |      |   |     |   |                              |   |                   |    |                                    |     |                   |
| 8                                                                                                                                                                                                                                                                                                                                                       | Negative binomial regression                                                                                                                                                                                                                                                                                                                                                                                                                                                                                                                                                                                                                                         |     |                      |   |                                                  |   |                   |   |                     |   |                     |   |                    |   |      |   |     |   |                              |   |                   |    |                                    |     |                   |
| 9                                                                                                                                                                                                                                                                                                                                                       | GLM (unspecified)                                                                                                                                                                                                                                                                                                                                                                                                                                                                                                                                                                                                                                                    |     |                      |   |                                                  |   |                   |   |                     |   |                     |   |                    |   |      |   |     |   |                              |   |                   |    |                                    |     |                   |
| 10                                                                                                                                                                                                                                                                                                                                                      | Segmented regression (unspecified)                                                                                                                                                                                                                                                                                                                                                                                                                                                                                                                                                                                                                                   |     |                      |   |                                                  |   |                   |   |                     |   |                     |   |                    |   |      |   |     |   |                              |   |                   |    |                                    |     |                   |
| 999                                                                                                                                                                                                                                                                                                                                                     | Other [elaborate]                                                                                                                                                                                                                                                                                                                                                                                                                                                                                                                                                                                                                                                    |     |                      |   |                                                  |   |                   |   |                     |   |                     |   |                    |   |      |   |     |   |                              |   |                   |    |                                    |     |                   |
| <b>Did the authors make any mention of autocorrelation?</b><br>Also known as "serial dependence", "serial correlation"                                                                                                                                                                                                                                  | multiple-choice <table border="1"> <tr> <td>1</td><td>Yes</td></tr> <tr> <td>0</td><td>No</td></tr> </table>                                                                                                                                                                                                                                                                                                                                                                                                                                                                                                                                                         | 1   | Yes                  | 0 | No                                               |   |                   |   |                     |   |                     |   |                    |   |      |   |     |   |                              |   |                   |    |                                    |     |                   |
| 1                                                                                                                                                                                                                                                                                                                                                       | Yes                                                                                                                                                                                                                                                                                                                                                                                                                                                                                                                                                                                                                                                                  |     |                      |   |                                                  |   |                   |   |                     |   |                     |   |                    |   |      |   |     |   |                              |   |                   |    |                                    |     |                   |
| 0                                                                                                                                                                                                                                                                                                                                                       | No                                                                                                                                                                                                                                                                                                                                                                                                                                                                                                                                                                                                                                                                   |     |                      |   |                                                  |   |                   |   |                     |   |                     |   |                    |   |      |   |     |   |                              |   |                   |    |                                    |     |                   |
| <b>How did the authors decide whether to adjust for autocorrelation?</b>                                                                                                                                                                                                                                                                                | checkbox                                                                                                                                                                                                                                                                                                                                                                                                                                                                                                                                                                                                                                                             |     |                      |   |                                                  |   |                   |   |                     |   |                     |   |                    |   |      |   |     |   |                              |   |                   |    |                                    |     |                   |

| Question                                                                                                                                                                                                                                                                                                                                                                                                                                                                                                                                                                                                                                                                                                                                                                                                                                                                                                                                                                                                                                                                                                                                                                                    | Options                                                                                                                                                                                                                                                                                                                                                                                                                                                                                                                                                                                                                                                                                   |    |                                                                                                        |   |                                                                                         |   |                                                                                                          |   |                                      |   |                                                                                   |     |                   |
|---------------------------------------------------------------------------------------------------------------------------------------------------------------------------------------------------------------------------------------------------------------------------------------------------------------------------------------------------------------------------------------------------------------------------------------------------------------------------------------------------------------------------------------------------------------------------------------------------------------------------------------------------------------------------------------------------------------------------------------------------------------------------------------------------------------------------------------------------------------------------------------------------------------------------------------------------------------------------------------------------------------------------------------------------------------------------------------------------------------------------------------------------------------------------------------------|-------------------------------------------------------------------------------------------------------------------------------------------------------------------------------------------------------------------------------------------------------------------------------------------------------------------------------------------------------------------------------------------------------------------------------------------------------------------------------------------------------------------------------------------------------------------------------------------------------------------------------------------------------------------------------------------|----|--------------------------------------------------------------------------------------------------------|---|-----------------------------------------------------------------------------------------|---|----------------------------------------------------------------------------------------------------------|---|--------------------------------------|---|-----------------------------------------------------------------------------------|-----|-------------------|
| <ul style="list-style-type: none"> <li>Decided based on a visual or statistical test for presence of autocorrelation: authors decide whether to adjust for autocorrelation based on visual inspection of plots (e.g. ACF &amp; PACF, histograms) or statistical tests (e.g. Durbin-Watson, Cumby-Huizinga), and go with one model only, without fitting multiple models.</li> <li>Ran multiple models with different autocorrelation parameters and select based on model fit: e.g. the Box-Jenkins method of fitting ARIMA models. The final model may be selected based on improved fit (AIC), no residual autocorrelation (Ljung-Box) or any other criteria set by authors.</li> <li>Always adjusted for autocorrelation: authors described a specific method of autocorrelation e.g. "We will use method xyz to adjust for autocorrelation" without any mention of a test or fitting multiple models</li> <li>Fit an ARIMA model (no further information): authors mentioned the use of "the ARIMA method", "the Box-Jenkins method" or "fitting an ARIMA model" without providing any information on how the parameters are selected and how the final models are selected.</li> </ul> | <table border="1"> <tr> <td>99</td> <td>Cannot be determined - author did not describe any decision rule</td> </tr> <tr> <td>1</td> <td>Decided based on a visual or statistical test for presence of autocorrelation</td> </tr> <tr> <td>2</td> <td>Ran multiple models with different autocorrelation parameters and selected based on model fit</td> </tr> <tr> <td>3</td> <td>Always adjusted for autocorrelation</td> </tr> <tr> <td>4</td> <td>Fit an ARIMA model (no further information)</td> </tr> <tr> <td>999</td> <td>Other [elaborate]</td> </tr> </table>                                                                                                                   | 99 | Cannot be determined - author did not describe any decision rule                                       | 1 | Decided based on a visual or statistical test for presence of autocorrelation           | 2 | Ran multiple models with different autocorrelation parameters and selected based on model fit            | 3 | Always adjusted for autocorrelation  | 4 | Fit an ARIMA model (no further information)                                       | 999 | Other [elaborate] |
| 99                                                                                                                                                                                                                                                                                                                                                                                                                                                                                                                                                                                                                                                                                                                                                                                                                                                                                                                                                                                                                                                                                                                                                                                          | Cannot be determined - author did not describe any decision rule                                                                                                                                                                                                                                                                                                                                                                                                                                                                                                                                                                                                                          |    |                                                                                                        |   |                                                                                         |   |                                                                                                          |   |                                      |   |                                                                                   |     |                   |
| 1                                                                                                                                                                                                                                                                                                                                                                                                                                                                                                                                                                                                                                                                                                                                                                                                                                                                                                                                                                                                                                                                                                                                                                                           | Decided based on a visual or statistical test for presence of autocorrelation                                                                                                                                                                                                                                                                                                                                                                                                                                                                                                                                                                                                             |    |                                                                                                        |   |                                                                                         |   |                                                                                                          |   |                                      |   |                                                                                   |     |                   |
| 2                                                                                                                                                                                                                                                                                                                                                                                                                                                                                                                                                                                                                                                                                                                                                                                                                                                                                                                                                                                                                                                                                                                                                                                           | Ran multiple models with different autocorrelation parameters and selected based on model fit                                                                                                                                                                                                                                                                                                                                                                                                                                                                                                                                                                                             |    |                                                                                                        |   |                                                                                         |   |                                                                                                          |   |                                      |   |                                                                                   |     |                   |
| 3                                                                                                                                                                                                                                                                                                                                                                                                                                                                                                                                                                                                                                                                                                                                                                                                                                                                                                                                                                                                                                                                                                                                                                                           | Always adjusted for autocorrelation                                                                                                                                                                                                                                                                                                                                                                                                                                                                                                                                                                                                                                                       |    |                                                                                                        |   |                                                                                         |   |                                                                                                          |   |                                      |   |                                                                                   |     |                   |
| 4                                                                                                                                                                                                                                                                                                                                                                                                                                                                                                                                                                                                                                                                                                                                                                                                                                                                                                                                                                                                                                                                                                                                                                                           | Fit an ARIMA model (no further information)                                                                                                                                                                                                                                                                                                                                                                                                                                                                                                                                                                                                                                               |    |                                                                                                        |   |                                                                                         |   |                                                                                                          |   |                                      |   |                                                                                   |     |                   |
| 999                                                                                                                                                                                                                                                                                                                                                                                                                                                                                                                                                                                                                                                                                                                                                                                                                                                                                                                                                                                                                                                                                                                                                                                         | Other [elaborate]                                                                                                                                                                                                                                                                                                                                                                                                                                                                                                                                                                                                                                                                         |    |                                                                                                        |   |                                                                                         |   |                                                                                                          |   |                                      |   |                                                                                   |     |                   |
| <p><b>How was the presence of autocorrelation tested?</b></p> <p>These tests could be conducted either before or after model identification and selecting.</p>                                                                                                                                                                                                                                                                                                                                                                                                                                                                                                                                                                                                                                                                                                                                                                                                                                                                                                                                                                                                                              | <p>checkbox</p> <table border="1"> <tr> <td>99</td> <td>Cannot be determined - authors did not describe clearly a method to detect presence of autocorrelation</td> </tr> <tr> <td>1</td> <td>Statistical test (e.g. Durbin-Watson, Breusch-Godfrey, Ljung-Box, Cumby-Huizinga tests)</td> </tr> <tr> <td>2</td> <td>Visual inspection of time series (autocorrelation and partial autocorrelation function plots, histogram)</td> </tr> <tr> <td>3</td> <td>Statistically significant parameters</td> </tr> <tr> <td>4</td> <td>Improved model fit after autocorrelation was accounted for (AIC, likelihood test)</td> </tr> <tr> <td>999</td> <td>Other [elaborate]</td> </tr> </table> | 99 | Cannot be determined - authors did not describe clearly a method to detect presence of autocorrelation | 1 | Statistical test (e.g. Durbin-Watson, Breusch-Godfrey, Ljung-Box, Cumby-Huizinga tests) | 2 | Visual inspection of time series (autocorrelation and partial autocorrelation function plots, histogram) | 3 | Statistically significant parameters | 4 | Improved model fit after autocorrelation was accounted for (AIC, likelihood test) | 999 | Other [elaborate] |
| 99                                                                                                                                                                                                                                                                                                                                                                                                                                                                                                                                                                                                                                                                                                                                                                                                                                                                                                                                                                                                                                                                                                                                                                                          | Cannot be determined - authors did not describe clearly a method to detect presence of autocorrelation                                                                                                                                                                                                                                                                                                                                                                                                                                                                                                                                                                                    |    |                                                                                                        |   |                                                                                         |   |                                                                                                          |   |                                      |   |                                                                                   |     |                   |
| 1                                                                                                                                                                                                                                                                                                                                                                                                                                                                                                                                                                                                                                                                                                                                                                                                                                                                                                                                                                                                                                                                                                                                                                                           | Statistical test (e.g. Durbin-Watson, Breusch-Godfrey, Ljung-Box, Cumby-Huizinga tests)                                                                                                                                                                                                                                                                                                                                                                                                                                                                                                                                                                                                   |    |                                                                                                        |   |                                                                                         |   |                                                                                                          |   |                                      |   |                                                                                   |     |                   |
| 2                                                                                                                                                                                                                                                                                                                                                                                                                                                                                                                                                                                                                                                                                                                                                                                                                                                                                                                                                                                                                                                                                                                                                                                           | Visual inspection of time series (autocorrelation and partial autocorrelation function plots, histogram)                                                                                                                                                                                                                                                                                                                                                                                                                                                                                                                                                                                  |    |                                                                                                        |   |                                                                                         |   |                                                                                                          |   |                                      |   |                                                                                   |     |                   |
| 3                                                                                                                                                                                                                                                                                                                                                                                                                                                                                                                                                                                                                                                                                                                                                                                                                                                                                                                                                                                                                                                                                                                                                                                           | Statistically significant parameters                                                                                                                                                                                                                                                                                                                                                                                                                                                                                                                                                                                                                                                      |    |                                                                                                        |   |                                                                                         |   |                                                                                                          |   |                                      |   |                                                                                   |     |                   |
| 4                                                                                                                                                                                                                                                                                                                                                                                                                                                                                                                                                                                                                                                                                                                                                                                                                                                                                                                                                                                                                                                                                                                                                                                           | Improved model fit after autocorrelation was accounted for (AIC, likelihood test)                                                                                                                                                                                                                                                                                                                                                                                                                                                                                                                                                                                                         |    |                                                                                                        |   |                                                                                         |   |                                                                                                          |   |                                      |   |                                                                                   |     |                   |
| 999                                                                                                                                                                                                                                                                                                                                                                                                                                                                                                                                                                                                                                                                                                                                                                                                                                                                                                                                                                                                                                                                                                                                                                                         | Other [elaborate]                                                                                                                                                                                                                                                                                                                                                                                                                                                                                                                                                                                                                                                                         |    |                                                                                                        |   |                                                                                         |   |                                                                                                          |   |                                      |   |                                                                                   |     |                   |
| <p><b>How was autocorrelation adjusted?</b></p>                                                                                                                                                                                                                                                                                                                                                                                                                                                                                                                                                                                                                                                                                                                                                                                                                                                                                                                                                                                                                                                                                                                                             | checkbox                                                                                                                                                                                                                                                                                                                                                                                                                                                                                                                                                                                                                                                                                  |    |                                                                                                        |   |                                                                                         |   |                                                                                                          |   |                                      |   |                                                                                   |     |                   |

| Question                                                                                                                                                             | Options                                                                                                                                                                                                                                                                                                                                                                                                                                                                                                                                                                                                                                                                  |    |                                                                                               |   |                                                                    |   |                                                                                                                          |   |                                                                                 |     |                                              |   |                                                          |
|----------------------------------------------------------------------------------------------------------------------------------------------------------------------|--------------------------------------------------------------------------------------------------------------------------------------------------------------------------------------------------------------------------------------------------------------------------------------------------------------------------------------------------------------------------------------------------------------------------------------------------------------------------------------------------------------------------------------------------------------------------------------------------------------------------------------------------------------------------|----|-----------------------------------------------------------------------------------------------|---|--------------------------------------------------------------------|---|--------------------------------------------------------------------------------------------------------------------------|---|---------------------------------------------------------------------------------|-----|----------------------------------------------|---|----------------------------------------------------------|
|                                                                                                                                                                      | <table border="1"> <tr> <td>99</td> <td>Cannot be determined - author did not describe clearly a method to adjust for autocorrelation</td> </tr> <tr> <td>0</td> <td>Not applicable - author confirmed autocorrelation was not adjusted</td> </tr> <tr> <td>1</td> <td>Used non-ARIMA methods to adjust (e.g. Newey-West, Prais-Winsten, GLS, REML) or model (adding lag terms) autocorrelation</td> </tr> <tr> <td>2</td> <td>Directly modelled the error structure using ARIMA</td> </tr> <tr> <td>999</td> <td>Other [elaborate]</td> </tr> </table>                                                                                                                  | 99 | Cannot be determined - author did not describe clearly a method to adjust for autocorrelation | 0 | Not applicable - author confirmed autocorrelation was not adjusted | 1 | Used non-ARIMA methods to adjust (e.g. Newey-West, Prais-Winsten, GLS, REML) or model (adding lag terms) autocorrelation | 2 | Directly modelled the error structure using ARIMA                               | 999 | Other [elaborate]                            |   |                                                          |
| 99                                                                                                                                                                   | Cannot be determined - author did not describe clearly a method to adjust for autocorrelation                                                                                                                                                                                                                                                                                                                                                                                                                                                                                                                                                                            |    |                                                                                               |   |                                                                    |   |                                                                                                                          |   |                                                                                 |     |                                              |   |                                                          |
| 0                                                                                                                                                                    | Not applicable - author confirmed autocorrelation was not adjusted                                                                                                                                                                                                                                                                                                                                                                                                                                                                                                                                                                                                       |    |                                                                                               |   |                                                                    |   |                                                                                                                          |   |                                                                                 |     |                                              |   |                                                          |
| 1                                                                                                                                                                    | Used non-ARIMA methods to adjust (e.g. Newey-West, Prais-Winsten, GLS, REML) or model (adding lag terms) autocorrelation                                                                                                                                                                                                                                                                                                                                                                                                                                                                                                                                                 |    |                                                                                               |   |                                                                    |   |                                                                                                                          |   |                                                                                 |     |                                              |   |                                                          |
| 2                                                                                                                                                                    | Directly modelled the error structure using ARIMA                                                                                                                                                                                                                                                                                                                                                                                                                                                                                                                                                                                                                        |    |                                                                                               |   |                                                                    |   |                                                                                                                          |   |                                                                                 |     |                                              |   |                                                          |
| 999                                                                                                                                                                  | Other [elaborate]                                                                                                                                                                                                                                                                                                                                                                                                                                                                                                                                                                                                                                                        |    |                                                                                               |   |                                                                    |   |                                                                                                                          |   |                                                                                 |     |                                              |   |                                                          |
| <b>Did the authors make any mention of seasonality?</b><br>Also known as "seasonal variation", "seasonal cycles", "periodic fluctuations" or phrases to that effect. | multiple-choice<br><table border="1"> <tr> <td>1</td> <td>Yes</td> </tr> <tr> <td>0</td> <td>No</td> </tr> </table>                                                                                                                                                                                                                                                                                                                                                                                                                                                                                                                                                      | 1  | Yes                                                                                           | 0 | No                                                                 |   |                                                                                                                          |   |                                                                                 |     |                                              |   |                                                          |
| 1                                                                                                                                                                    | Yes                                                                                                                                                                                                                                                                                                                                                                                                                                                                                                                                                                                                                                                                      |    |                                                                                               |   |                                                                    |   |                                                                                                                          |   |                                                                                 |     |                                              |   |                                                          |
| 0                                                                                                                                                                    | No                                                                                                                                                                                                                                                                                                                                                                                                                                                                                                                                                                                                                                                                       |    |                                                                                               |   |                                                                    |   |                                                                                                                          |   |                                                                                 |     |                                              |   |                                                          |
| <b>How was seasonality tested and/or adjusted?</b>                                                                                                                   | checkbox<br><table border="1"> <tr> <td>99</td> <td>Cannot be determined - author did not describe clearly a method of dealing with seasonality</td> </tr> <tr> <td>0</td> <td>Not applicable - author specified seasonality was not adjusted</td> </tr> <tr> <td>1</td> <td>Determined whether seasonality is present, either visually or via a statistical test</td> </tr> <tr> <td>2</td> <td>Adjusted by adding a regression term for time (e.g. months, seasons) into model</td> </tr> <tr> <td>3</td> <td>Adjusted by fitting Fourier terms into model</td> </tr> <tr> <td>4</td> <td>Adjusted by fitting a spline function of time into model</td> </tr> </table> | 99 | Cannot be determined - author did not describe clearly a method of dealing with seasonality   | 0 | Not applicable - author specified seasonality was not adjusted     | 1 | Determined whether seasonality is present, either visually or via a statistical test                                     | 2 | Adjusted by adding a regression term for time (e.g. months, seasons) into model | 3   | Adjusted by fitting Fourier terms into model | 4 | Adjusted by fitting a spline function of time into model |
| 99                                                                                                                                                                   | Cannot be determined - author did not describe clearly a method of dealing with seasonality                                                                                                                                                                                                                                                                                                                                                                                                                                                                                                                                                                              |    |                                                                                               |   |                                                                    |   |                                                                                                                          |   |                                                                                 |     |                                              |   |                                                          |
| 0                                                                                                                                                                    | Not applicable - author specified seasonality was not adjusted                                                                                                                                                                                                                                                                                                                                                                                                                                                                                                                                                                                                           |    |                                                                                               |   |                                                                    |   |                                                                                                                          |   |                                                                                 |     |                                              |   |                                                          |
| 1                                                                                                                                                                    | Determined whether seasonality is present, either visually or via a statistical test                                                                                                                                                                                                                                                                                                                                                                                                                                                                                                                                                                                     |    |                                                                                               |   |                                                                    |   |                                                                                                                          |   |                                                                                 |     |                                              |   |                                                          |
| 2                                                                                                                                                                    | Adjusted by adding a regression term for time (e.g. months, seasons) into model                                                                                                                                                                                                                                                                                                                                                                                                                                                                                                                                                                                          |    |                                                                                               |   |                                                                    |   |                                                                                                                          |   |                                                                                 |     |                                              |   |                                                          |
| 3                                                                                                                                                                    | Adjusted by fitting Fourier terms into model                                                                                                                                                                                                                                                                                                                                                                                                                                                                                                                                                                                                                             |    |                                                                                               |   |                                                                    |   |                                                                                                                          |   |                                                                                 |     |                                              |   |                                                          |
| 4                                                                                                                                                                    | Adjusted by fitting a spline function of time into model                                                                                                                                                                                                                                                                                                                                                                                                                                                                                                                                                                                                                 |    |                                                                                               |   |                                                                    |   |                                                                                                                          |   |                                                                                 |     |                                              |   |                                                          |

| Question                                              | Options                                                                                                                                                                                                                                                                                                                                                                                                                                                                                                                                                                                                                                                                                              |    |                                                                                                  |   |                                                                     |     |                                                                                                                               |   |                                                                         |   |                                                                    |     |                   |
|-------------------------------------------------------|------------------------------------------------------------------------------------------------------------------------------------------------------------------------------------------------------------------------------------------------------------------------------------------------------------------------------------------------------------------------------------------------------------------------------------------------------------------------------------------------------------------------------------------------------------------------------------------------------------------------------------------------------------------------------------------------------|----|--------------------------------------------------------------------------------------------------|---|---------------------------------------------------------------------|-----|-------------------------------------------------------------------------------------------------------------------------------|---|-------------------------------------------------------------------------|---|--------------------------------------------------------------------|-----|-------------------|
|                                                       | <table border="1"> <tr> <td>5</td> <td>Adjusted by modelling under ARIMA (e.g. SARIMA model)</td> </tr> <tr> <td>6</td> <td>Compared to a control that is not affected by seasonality</td> </tr> <tr> <td>999</td> <td>Other [elaborate]</td> </tr> </table>                                                                                                                                                                                                                                                                                                                                                                                                                                         | 5  | Adjusted by modelling under ARIMA (e.g. SARIMA model)                                            | 6 | Compared to a control that is not affected by seasonality           | 999 | Other [elaborate]                                                                                                             |   |                                                                         |   |                                                                    |     |                   |
| 5                                                     | Adjusted by modelling under ARIMA (e.g. SARIMA model)                                                                                                                                                                                                                                                                                                                                                                                                                                                                                                                                                                                                                                                |    |                                                                                                  |   |                                                                     |     |                                                                                                                               |   |                                                                         |   |                                                                    |     |                   |
| 6                                                     | Compared to a control that is not affected by seasonality                                                                                                                                                                                                                                                                                                                                                                                                                                                                                                                                                                                                                                            |    |                                                                                                  |   |                                                                     |     |                                                                                                                               |   |                                                                         |   |                                                                    |     |                   |
| 999                                                   | Other [elaborate]                                                                                                                                                                                                                                                                                                                                                                                                                                                                                                                                                                                                                                                                                    |    |                                                                                                  |   |                                                                     |     |                                                                                                                               |   |                                                                         |   |                                                                    |     |                   |
| Did the authors make any mention of non-stationarity? | multiple-choice<br><table border="1"> <tr> <td>1</td> <td>Yes</td> </tr> <tr> <td>0</td> <td>No</td> </tr> </table>                                                                                                                                                                                                                                                                                                                                                                                                                                                                                                                                                                                  | 1  | Yes                                                                                              | 0 | No                                                                  |     |                                                                                                                               |   |                                                                         |   |                                                                    |     |                   |
| 1                                                     | Yes                                                                                                                                                                                                                                                                                                                                                                                                                                                                                                                                                                                                                                                                                                  |    |                                                                                                  |   |                                                                     |     |                                                                                                                               |   |                                                                         |   |                                                                    |     |                   |
| 0                                                     | No                                                                                                                                                                                                                                                                                                                                                                                                                                                                                                                                                                                                                                                                                                   |    |                                                                                                  |   |                                                                     |     |                                                                                                                               |   |                                                                         |   |                                                                    |     |                   |
| How was non-stationarity detected and/or adjusted?    | checkbox<br><table border="1"> <tr> <td>99</td> <td>Cannot be determined - author did not describe clearly a method of dealing with non-stationarity</td> </tr> <tr> <td>0</td> <td>Not applicable - author specified non-stationarity was not adjusted</td> </tr> <tr> <td>1</td> <td>Determined whether non-stationarity is present, either visually or via a statistical test (e.g. Augmented Dickey-Fuller test)</td> </tr> <tr> <td>2</td> <td>Transformed to stationary series by differencing using non-ARIMA method</td> </tr> <tr> <td>3</td> <td>Transformed to stationary series by differencing under ARIMA model</td> </tr> <tr> <td>999</td> <td>Other [elaborate]</td> </tr> </table> | 99 | Cannot be determined - author did not describe clearly a method of dealing with non-stationarity | 0 | Not applicable - author specified non-stationarity was not adjusted | 1   | Determined whether non-stationarity is present, either visually or via a statistical test (e.g. Augmented Dickey-Fuller test) | 2 | Transformed to stationary series by differencing using non-ARIMA method | 3 | Transformed to stationary series by differencing under ARIMA model | 999 | Other [elaborate] |
| 99                                                    | Cannot be determined - author did not describe clearly a method of dealing with non-stationarity                                                                                                                                                                                                                                                                                                                                                                                                                                                                                                                                                                                                     |    |                                                                                                  |   |                                                                     |     |                                                                                                                               |   |                                                                         |   |                                                                    |     |                   |
| 0                                                     | Not applicable - author specified non-stationarity was not adjusted                                                                                                                                                                                                                                                                                                                                                                                                                                                                                                                                                                                                                                  |    |                                                                                                  |   |                                                                     |     |                                                                                                                               |   |                                                                         |   |                                                                    |     |                   |
| 1                                                     | Determined whether non-stationarity is present, either visually or via a statistical test (e.g. Augmented Dickey-Fuller test)                                                                                                                                                                                                                                                                                                                                                                                                                                                                                                                                                                        |    |                                                                                                  |   |                                                                     |     |                                                                                                                               |   |                                                                         |   |                                                                    |     |                   |
| 2                                                     | Transformed to stationary series by differencing using non-ARIMA method                                                                                                                                                                                                                                                                                                                                                                                                                                                                                                                                                                                                                              |    |                                                                                                  |   |                                                                     |     |                                                                                                                               |   |                                                                         |   |                                                                    |     |                   |
| 3                                                     | Transformed to stationary series by differencing under ARIMA model                                                                                                                                                                                                                                                                                                                                                                                                                                                                                                                                                                                                                                   |    |                                                                                                  |   |                                                                     |     |                                                                                                                               |   |                                                                         |   |                                                                    |     |                   |
| 999                                                   | Other [elaborate]                                                                                                                                                                                                                                                                                                                                                                                                                                                                                                                                                                                                                                                                                    |    |                                                                                                  |   |                                                                     |     |                                                                                                                               |   |                                                                         |   |                                                                    |     |                   |
| How were anomalous or outlying data points handled?   | checkbox<br><table border="1"> <tr> <td>99</td> <td>Cannot be determined - author did not mention anomaly or outliers</td> </tr> </table>                                                                                                                                                                                                                                                                                                                                                                                                                                                                                                                                                            | 99 | Cannot be determined - author did not mention anomaly or outliers                                |   |                                                                     |     |                                                                                                                               |   |                                                                         |   |                                                                    |     |                   |
| 99                                                    | Cannot be determined - author did not mention anomaly or outliers                                                                                                                                                                                                                                                                                                                                                                                                                                                                                                                                                                                                                                    |    |                                                                                                  |   |                                                                     |     |                                                                                                                               |   |                                                                         |   |                                                                    |     |                   |

| Question                                                                                                                                                                                                                                                                                                                                                                | Options                                                                                                                                                                                                                                                                                                                                                                                                                                                                                                                                                                |   |                                                                                            |   |                                                                   |   |                        |   |                                               |   |                                                                                            |     |                   |
|-------------------------------------------------------------------------------------------------------------------------------------------------------------------------------------------------------------------------------------------------------------------------------------------------------------------------------------------------------------------------|------------------------------------------------------------------------------------------------------------------------------------------------------------------------------------------------------------------------------------------------------------------------------------------------------------------------------------------------------------------------------------------------------------------------------------------------------------------------------------------------------------------------------------------------------------------------|---|--------------------------------------------------------------------------------------------|---|-------------------------------------------------------------------|---|------------------------|---|-----------------------------------------------|---|--------------------------------------------------------------------------------------------|-----|-------------------|
|                                                                                                                                                                                                                                                                                                                                                                         | <table border="1"> <tr> <td>0</td> <td>Not applicable - author confirmed anomalous or outlying data points were not accounted for</td> </tr> <tr> <td>1</td> <td>Determined using a threshold or decision rule specified by author</td> </tr> <tr> <td>2</td> <td>Excluded from analysis</td> </tr> <tr> <td>3</td> <td>Analysed separately from the main time series</td> </tr> <tr> <td>4</td> <td>Included in the main time series but acknowledge them as anomalous or outlying data points</td> </tr> <tr> <td>999</td> <td>Other [elaborate]</td> </tr> </table> | 0 | Not applicable - author confirmed anomalous or outlying data points were not accounted for | 1 | Determined using a threshold or decision rule specified by author | 2 | Excluded from analysis | 3 | Analysed separately from the main time series | 4 | Included in the main time series but acknowledge them as anomalous or outlying data points | 999 | Other [elaborate] |
| 0                                                                                                                                                                                                                                                                                                                                                                       | Not applicable - author confirmed anomalous or outlying data points were not accounted for                                                                                                                                                                                                                                                                                                                                                                                                                                                                             |   |                                                                                            |   |                                                                   |   |                        |   |                                               |   |                                                                                            |     |                   |
| 1                                                                                                                                                                                                                                                                                                                                                                       | Determined using a threshold or decision rule specified by author                                                                                                                                                                                                                                                                                                                                                                                                                                                                                                      |   |                                                                                            |   |                                                                   |   |                        |   |                                               |   |                                                                                            |     |                   |
| 2                                                                                                                                                                                                                                                                                                                                                                       | Excluded from analysis                                                                                                                                                                                                                                                                                                                                                                                                                                                                                                                                                 |   |                                                                                            |   |                                                                   |   |                        |   |                                               |   |                                                                                            |     |                   |
| 3                                                                                                                                                                                                                                                                                                                                                                       | Analysed separately from the main time series                                                                                                                                                                                                                                                                                                                                                                                                                                                                                                                          |   |                                                                                            |   |                                                                   |   |                        |   |                                               |   |                                                                                            |     |                   |
| 4                                                                                                                                                                                                                                                                                                                                                                       | Included in the main time series but acknowledge them as anomalous or outlying data points                                                                                                                                                                                                                                                                                                                                                                                                                                                                             |   |                                                                                            |   |                                                                   |   |                        |   |                                               |   |                                                                                            |     |                   |
| 999                                                                                                                                                                                                                                                                                                                                                                     | Other [elaborate]                                                                                                                                                                                                                                                                                                                                                                                                                                                                                                                                                      |   |                                                                                            |   |                                                                   |   |                        |   |                                               |   |                                                                                            |     |                   |
| Was there any subgroup analysis?                                                                                                                                                                                                                                                                                                                                        | multiple-choice <table border="1"> <tr> <td>1</td> <td>Yes</td> </tr> <tr> <td>0</td> <td>No</td> </tr> </table>                                                                                                                                                                                                                                                                                                                                                                                                                                                       | 1 | Yes                                                                                        | 0 | No                                                                |   |                        |   |                                               |   |                                                                                            |     |                   |
| 1                                                                                                                                                                                                                                                                                                                                                                       | Yes                                                                                                                                                                                                                                                                                                                                                                                                                                                                                                                                                                    |   |                                                                                            |   |                                                                   |   |                        |   |                                               |   |                                                                                            |     |                   |
| 0                                                                                                                                                                                                                                                                                                                                                                       | No                                                                                                                                                                                                                                                                                                                                                                                                                                                                                                                                                                     |   |                                                                                            |   |                                                                   |   |                        |   |                                               |   |                                                                                            |     |                   |
| <b>If so, summarise the basis of subgroup analyses</b><br>Examples: by type of intervention; by population; by type of control                                                                                                                                                                                                                                          | text                                                                                                                                                                                                                                                                                                                                                                                                                                                                                                                                                                   |   |                                                                                            |   |                                                                   |   |                        |   |                                               |   |                                                                                            |     |                   |
| Was there any sensitivity analysis?                                                                                                                                                                                                                                                                                                                                     | multiple-choice <table border="1"> <tr> <td>1</td> <td>Yes</td> </tr> <tr> <td>0</td> <td>No</td> </tr> </table>                                                                                                                                                                                                                                                                                                                                                                                                                                                       | 1 | Yes                                                                                        | 0 | No                                                                |   |                        |   |                                               |   |                                                                                            |     |                   |
| 1                                                                                                                                                                                                                                                                                                                                                                       | Yes                                                                                                                                                                                                                                                                                                                                                                                                                                                                                                                                                                    |   |                                                                                            |   |                                                                   |   |                        |   |                                               |   |                                                                                            |     |                   |
| 0                                                                                                                                                                                                                                                                                                                                                                       | No                                                                                                                                                                                                                                                                                                                                                                                                                                                                                                                                                                     |   |                                                                                            |   |                                                                   |   |                        |   |                                               |   |                                                                                            |     |                   |
| <b>If so, summarise the basis of sensitivity analyses</b><br>Examples: excluding x; restricted to y                                                                                                                                                                                                                                                                     | text                                                                                                                                                                                                                                                                                                                                                                                                                                                                                                                                                                   |   |                                                                                            |   |                                                                   |   |                        |   |                                               |   |                                                                                            |     |                   |
| <b>Was there a control series?</b><br>Any of the following can be considered a control series: <ul style="list-style-type: none"> <li>location-based e.g. a control site that does not receive intervention</li> <li>characteristic-based e.g. a cohort of a different age, a cohort without mental illness (for an intervention targeting mental illnesses)</li> </ul> | multiple-choice <table border="1"> <tr> <td>1</td> <td>Yes</td> </tr> <tr> <td>0</td> <td>No</td> </tr> </table>                                                                                                                                                                                                                                                                                                                                                                                                                                                       | 1 | Yes                                                                                        | 0 | No                                                                |   |                        |   |                                               |   |                                                                                            |     |                   |
| 1                                                                                                                                                                                                                                                                                                                                                                       | Yes                                                                                                                                                                                                                                                                                                                                                                                                                                                                                                                                                                    |   |                                                                                            |   |                                                                   |   |                        |   |                                               |   |                                                                                            |     |                   |
| 0                                                                                                                                                                                                                                                                                                                                                                       | No                                                                                                                                                                                                                                                                                                                                                                                                                                                                                                                                                                     |   |                                                                                            |   |                                                                   |   |                        |   |                                               |   |                                                                                            |     |                   |

| Question                                                                                                                                                                                                                                                                                                                                                                                                                                                                                                                             | Options                                                                                                                                                                                                                                                                                                                                                                                                                                        |    |                          |   |                                                                                           |   |                                                                       |   |                                  |     |                                |   |                                 |
|--------------------------------------------------------------------------------------------------------------------------------------------------------------------------------------------------------------------------------------------------------------------------------------------------------------------------------------------------------------------------------------------------------------------------------------------------------------------------------------------------------------------------------------|------------------------------------------------------------------------------------------------------------------------------------------------------------------------------------------------------------------------------------------------------------------------------------------------------------------------------------------------------------------------------------------------------------------------------------------------|----|--------------------------|---|-------------------------------------------------------------------------------------------|---|-----------------------------------------------------------------------|---|----------------------------------|-----|--------------------------------|---|---------------------------------|
| <ul style="list-style-type: none"> <li>behaviour-based e.g. a cohort who does not smoke (for an intervention targeting smoking)</li> <li>historical cohort e.g. a cohort from the same period 1 year before the intervention cohort</li> <li>control outcome e.g. an outcome that is not affected by the intervention</li> <li>control time period e.g. using the same cohort that receive an intervention targeting drink-driving, but measured at a time period where drink-driving is not likely (such as on weekdays)</li> </ul> |                                                                                                                                                                                                                                                                                                                                                                                                                                                |    |                          |   |                                                                                           |   |                                                                       |   |                                  |     |                                |   |                                 |
| <b>Briefly describe the control series</b><br>Examples: type of control, how they are different from the intervention series                                                                                                                                                                                                                                                                                                                                                                                                         | text                                                                                                                                                                                                                                                                                                                                                                                                                                           |    |                          |   |                                                                                           |   |                                                                       |   |                                  |     |                                |   |                                 |
| <b>If so, what was the method used to compare between the intervention and control series?</b>                                                                                                                                                                                                                                                                                                                                                                                                                                       | multiple-choice <table border="1"> <tr> <td>99</td><td>Cannot be determined</td></tr> <tr> <td>0</td><td>Presenting the control series independently, without comparing to the intervention series</td></tr> <tr> <td>1</td><td>A single model that includes both the intervention and control series</td></tr> <tr> <td>2</td><td>Narrative comparison</td></tr> <tr> <td>999</td><td>Other [elaborate]</td></tr> </table>                    | 99 | Cannot be determined     | 0 | Presenting the control series independently, without comparing to the intervention series | 1 | A single model that includes both the intervention and control series | 2 | Narrative comparison             | 999 | Other [elaborate]              |   |                                 |
| 99                                                                                                                                                                                                                                                                                                                                                                                                                                                                                                                                   | Cannot be determined                                                                                                                                                                                                                                                                                                                                                                                                                           |    |                          |   |                                                                                           |   |                                                                       |   |                                  |     |                                |   |                                 |
| 0                                                                                                                                                                                                                                                                                                                                                                                                                                                                                                                                    | Presenting the control series independently, without comparing to the intervention series                                                                                                                                                                                                                                                                                                                                                      |    |                          |   |                                                                                           |   |                                                                       |   |                                  |     |                                |   |                                 |
| 1                                                                                                                                                                                                                                                                                                                                                                                                                                                                                                                                    | A single model that includes both the intervention and control series                                                                                                                                                                                                                                                                                                                                                                          |    |                          |   |                                                                                           |   |                                                                       |   |                                  |     |                                |   |                                 |
| 2                                                                                                                                                                                                                                                                                                                                                                                                                                                                                                                                    | Narrative comparison                                                                                                                                                                                                                                                                                                                                                                                                                           |    |                          |   |                                                                                           |   |                                                                       |   |                                  |     |                                |   |                                 |
| 999                                                                                                                                                                                                                                                                                                                                                                                                                                                                                                                                  | Other [elaborate]                                                                                                                                                                                                                                                                                                                                                                                                                              |    |                          |   |                                                                                           |   |                                                                       |   |                                  |     |                                |   |                                 |
| <b>Assessment of discrepancies</b>                                                                                                                                                                                                                                                                                                                                                                                                                                                                                                   |                                                                                                                                                                                                                                                                                                                                                                                                                                                |    |                          |   |                                                                                           |   |                                                                       |   |                                  |     |                                |   |                                 |
| <b>Was there any discrepancy in the primary research question?</b>                                                                                                                                                                                                                                                                                                                                                                                                                                                                   | multiple-choice <table border="1"> <tr> <td>1</td><td>Info missing in protocol</td></tr> <tr> <td>2</td><td>Info missing in result report</td></tr> <tr> <td>3</td><td>Info missing in both protocol &amp; result report</td></tr> <tr> <td>4</td><td>Same level of details &amp; matching</td></tr> <tr> <td>5</td><td>RR has more details &amp; matching</td></tr> <tr> <td>6</td><td>RR has fewer details &amp; matching</td></tr> </table> | 1  | Info missing in protocol | 2 | Info missing in result report                                                             | 3 | Info missing in both protocol & result report                         | 4 | Same level of details & matching | 5   | RR has more details & matching | 6 | RR has fewer details & matching |
| 1                                                                                                                                                                                                                                                                                                                                                                                                                                                                                                                                    | Info missing in protocol                                                                                                                                                                                                                                                                                                                                                                                                                       |    |                          |   |                                                                                           |   |                                                                       |   |                                  |     |                                |   |                                 |
| 2                                                                                                                                                                                                                                                                                                                                                                                                                                                                                                                                    | Info missing in result report                                                                                                                                                                                                                                                                                                                                                                                                                  |    |                          |   |                                                                                           |   |                                                                       |   |                                  |     |                                |   |                                 |
| 3                                                                                                                                                                                                                                                                                                                                                                                                                                                                                                                                    | Info missing in both protocol & result report                                                                                                                                                                                                                                                                                                                                                                                                  |    |                          |   |                                                                                           |   |                                                                       |   |                                  |     |                                |   |                                 |
| 4                                                                                                                                                                                                                                                                                                                                                                                                                                                                                                                                    | Same level of details & matching                                                                                                                                                                                                                                                                                                                                                                                                               |    |                          |   |                                                                                           |   |                                                                       |   |                                  |     |                                |   |                                 |
| 5                                                                                                                                                                                                                                                                                                                                                                                                                                                                                                                                    | RR has more details & matching                                                                                                                                                                                                                                                                                                                                                                                                                 |    |                          |   |                                                                                           |   |                                                                       |   |                                  |     |                                |   |                                 |
| 6                                                                                                                                                                                                                                                                                                                                                                                                                                                                                                                                    | RR has fewer details & matching                                                                                                                                                                                                                                                                                                                                                                                                                |    |                          |   |                                                                                           |   |                                                                       |   |                                  |     |                                |   |                                 |



| Question                                                                                                | Options                                                                                                                                                                                                                                                                                                                                                                                                                                                                                                                                                           |   |                          |    |                               |    |                                               |   |                                  |   |                                |   |                                 |   |                    |    |                      |
|---------------------------------------------------------------------------------------------------------|-------------------------------------------------------------------------------------------------------------------------------------------------------------------------------------------------------------------------------------------------------------------------------------------------------------------------------------------------------------------------------------------------------------------------------------------------------------------------------------------------------------------------------------------------------------------|---|--------------------------|----|-------------------------------|----|-----------------------------------------------|---|----------------------------------|---|--------------------------------|---|---------------------------------|---|--------------------|----|----------------------|
|                                                                                                         | <table border="1"> <tr> <td>7</td> <td>Mismatched details</td> </tr> <tr> <td>99</td> <td>Cannot be determined</td> </tr> </table>                                                                                                                                                                                                                                                                                                                                                                                                                                | 7 | Mismatched details       | 99 | Cannot be determined          |    |                                               |   |                                  |   |                                |   |                                 |   |                    |    |                      |
| 7                                                                                                       | Mismatched details                                                                                                                                                                                                                                                                                                                                                                                                                                                                                                                                                |   |                          |    |                               |    |                                               |   |                                  |   |                                |   |                                 |   |                    |    |                      |
| 99                                                                                                      | Cannot be determined                                                                                                                                                                                                                                                                                                                                                                                                                                                                                                                                              |   |                          |    |                               |    |                                               |   |                                  |   |                                |   |                                 |   |                    |    |                      |
| Was the discrepancy important?                                                                          | multiple-choice <table border="1"> <tr> <td>1</td> <td>Potentially important</td> </tr> <tr> <td>0</td> <td>Likely unimportant</td> </tr> <tr> <td>99</td> <td>Uncertain</td> </tr> </table>                                                                                                                                                                                                                                                                                                                                                                      | 1 | Potentially important    | 0  | Likely unimportant            | 99 | Uncertain                                     |   |                                  |   |                                |   |                                 |   |                    |    |                      |
| 1                                                                                                       | Potentially important                                                                                                                                                                                                                                                                                                                                                                                                                                                                                                                                             |   |                          |    |                               |    |                                               |   |                                  |   |                                |   |                                 |   |                    |    |                      |
| 0                                                                                                       | Likely unimportant                                                                                                                                                                                                                                                                                                                                                                                                                                                                                                                                                |   |                          |    |                               |    |                                               |   |                                  |   |                                |   |                                 |   |                    |    |                      |
| 99                                                                                                      | Uncertain                                                                                                                                                                                                                                                                                                                                                                                                                                                                                                                                                         |   |                          |    |                               |    |                                               |   |                                  |   |                                |   |                                 |   |                    |    |                      |
| Explain why you think there is a discrepancy and whether this discrepancy is potentially important      | text                                                                                                                                                                                                                                                                                                                                                                                                                                                                                                                                                              |   |                          |    |                               |    |                                               |   |                                  |   |                                |   |                                 |   |                    |    |                      |
| Did the authors provide justification for the change/discrepancy?                                       | multiple-choice <table border="1"> <tr> <td>1</td> <td>Yes</td> </tr> <tr> <td>0</td> <td>No</td> </tr> <tr> <td>99</td> <td>Justification not needed</td> </tr> </table>                                                                                                                                                                                                                                                                                                                                                                                         | 1 | Yes                      | 0  | No                            | 99 | Justification not needed                      |   |                                  |   |                                |   |                                 |   |                    |    |                      |
| 1                                                                                                       | Yes                                                                                                                                                                                                                                                                                                                                                                                                                                                                                                                                                               |   |                          |    |                               |    |                                               |   |                                  |   |                                |   |                                 |   |                    |    |                      |
| 0                                                                                                       | No                                                                                                                                                                                                                                                                                                                                                                                                                                                                                                                                                                |   |                          |    |                               |    |                                               |   |                                  |   |                                |   |                                 |   |                    |    |                      |
| 99                                                                                                      | Justification not needed                                                                                                                                                                                                                                                                                                                                                                                                                                                                                                                                          |   |                          |    |                               |    |                                               |   |                                  |   |                                |   |                                 |   |                    |    |                      |
| What was the justification provided by authors?                                                         | text                                                                                                                                                                                                                                                                                                                                                                                                                                                                                                                                                              |   |                          |    |                               |    |                                               |   |                                  |   |                                |   |                                 |   |                    |    |                      |
| Was there any discrepancy in the eligibility criteria for participants/sites to be included in the ITS? | multiple-choice <table border="1"> <tr> <td>1</td> <td>Info missing in protocol</td> </tr> <tr> <td>2</td> <td>Info missing in result report</td> </tr> <tr> <td>3</td> <td>Info missing in both protocol &amp; result report</td> </tr> <tr> <td>4</td> <td>Same level of details &amp; matching</td> </tr> <tr> <td>5</td> <td>RR has more details &amp; matching</td> </tr> <tr> <td>6</td> <td>RR has fewer details &amp; matching</td> </tr> <tr> <td>7</td> <td>Mismatched details</td> </tr> <tr> <td>99</td> <td>Cannot be determined</td> </tr> </table> | 1 | Info missing in protocol | 2  | Info missing in result report | 3  | Info missing in both protocol & result report | 4 | Same level of details & matching | 5 | RR has more details & matching | 6 | RR has fewer details & matching | 7 | Mismatched details | 99 | Cannot be determined |
| 1                                                                                                       | Info missing in protocol                                                                                                                                                                                                                                                                                                                                                                                                                                                                                                                                          |   |                          |    |                               |    |                                               |   |                                  |   |                                |   |                                 |   |                    |    |                      |
| 2                                                                                                       | Info missing in result report                                                                                                                                                                                                                                                                                                                                                                                                                                                                                                                                     |   |                          |    |                               |    |                                               |   |                                  |   |                                |   |                                 |   |                    |    |                      |
| 3                                                                                                       | Info missing in both protocol & result report                                                                                                                                                                                                                                                                                                                                                                                                                                                                                                                     |   |                          |    |                               |    |                                               |   |                                  |   |                                |   |                                 |   |                    |    |                      |
| 4                                                                                                       | Same level of details & matching                                                                                                                                                                                                                                                                                                                                                                                                                                                                                                                                  |   |                          |    |                               |    |                                               |   |                                  |   |                                |   |                                 |   |                    |    |                      |
| 5                                                                                                       | RR has more details & matching                                                                                                                                                                                                                                                                                                                                                                                                                                                                                                                                    |   |                          |    |                               |    |                                               |   |                                  |   |                                |   |                                 |   |                    |    |                      |
| 6                                                                                                       | RR has fewer details & matching                                                                                                                                                                                                                                                                                                                                                                                                                                                                                                                                   |   |                          |    |                               |    |                                               |   |                                  |   |                                |   |                                 |   |                    |    |                      |
| 7                                                                                                       | Mismatched details                                                                                                                                                                                                                                                                                                                                                                                                                                                                                                                                                |   |                          |    |                               |    |                                               |   |                                  |   |                                |   |                                 |   |                    |    |                      |
| 99                                                                                                      | Cannot be determined                                                                                                                                                                                                                                                                                                                                                                                                                                                                                                                                              |   |                          |    |                               |    |                                               |   |                                  |   |                                |   |                                 |   |                    |    |                      |

| Question                                                                                           | Options                                                                                                                                                                                                                                                                                                                                                                                                                                                                                                                                           |   |                          |   |                               |    |                                               |   |                                  |   |                                |   |                                 |   |                    |    |                      |
|----------------------------------------------------------------------------------------------------|---------------------------------------------------------------------------------------------------------------------------------------------------------------------------------------------------------------------------------------------------------------------------------------------------------------------------------------------------------------------------------------------------------------------------------------------------------------------------------------------------------------------------------------------------|---|--------------------------|---|-------------------------------|----|-----------------------------------------------|---|----------------------------------|---|--------------------------------|---|---------------------------------|---|--------------------|----|----------------------|
| Was the discrepancy important?                                                                     | multiple-choice <table border="1"> <tr> <td>1</td><td>Potentially important</td></tr> <tr> <td>0</td><td>Likely unimportant</td></tr> <tr> <td>99</td><td>Uncertain</td></tr> </table>                                                                                                                                                                                                                                                                                                                                                            | 1 | Potentially important    | 0 | Likely unimportant            | 99 | Uncertain                                     |   |                                  |   |                                |   |                                 |   |                    |    |                      |
| 1                                                                                                  | Potentially important                                                                                                                                                                                                                                                                                                                                                                                                                                                                                                                             |   |                          |   |                               |    |                                               |   |                                  |   |                                |   |                                 |   |                    |    |                      |
| 0                                                                                                  | Likely unimportant                                                                                                                                                                                                                                                                                                                                                                                                                                                                                                                                |   |                          |   |                               |    |                                               |   |                                  |   |                                |   |                                 |   |                    |    |                      |
| 99                                                                                                 | Uncertain                                                                                                                                                                                                                                                                                                                                                                                                                                                                                                                                         |   |                          |   |                               |    |                                               |   |                                  |   |                                |   |                                 |   |                    |    |                      |
| Explain why you think there is a discrepancy and whether this discrepancy is potentially important | text                                                                                                                                                                                                                                                                                                                                                                                                                                                                                                                                              |   |                          |   |                               |    |                                               |   |                                  |   |                                |   |                                 |   |                    |    |                      |
| Did the authors provide justification for the change/discrepancy?                                  | multiple-choice <table border="1"> <tr> <td>1</td><td>Yes</td></tr> <tr> <td>0</td><td>No</td></tr> <tr> <td>99</td><td>Justification not needed</td></tr> </table>                                                                                                                                                                                                                                                                                                                                                                               | 1 | Yes                      | 0 | No                            | 99 | Justification not needed                      |   |                                  |   |                                |   |                                 |   |                    |    |                      |
| 1                                                                                                  | Yes                                                                                                                                                                                                                                                                                                                                                                                                                                                                                                                                               |   |                          |   |                               |    |                                               |   |                                  |   |                                |   |                                 |   |                    |    |                      |
| 0                                                                                                  | No                                                                                                                                                                                                                                                                                                                                                                                                                                                                                                                                                |   |                          |   |                               |    |                                               |   |                                  |   |                                |   |                                 |   |                    |    |                      |
| 99                                                                                                 | Justification not needed                                                                                                                                                                                                                                                                                                                                                                                                                                                                                                                          |   |                          |   |                               |    |                                               |   |                                  |   |                                |   |                                 |   |                    |    |                      |
| What was the justification provided by authors?                                                    | text                                                                                                                                                                                                                                                                                                                                                                                                                                                                                                                                              |   |                          |   |                               |    |                                               |   |                                  |   |                                |   |                                 |   |                    |    |                      |
| Was there any discrepancy in the data source?                                                      | multiple-choice <table border="1"> <tr> <td>1</td><td>Info missing in protocol</td></tr> <tr> <td>2</td><td>Info missing in result report</td></tr> <tr> <td>3</td><td>Info missing in both protocol &amp; result report</td></tr> <tr> <td>4</td><td>Same level of details &amp; matching</td></tr> <tr> <td>5</td><td>RR has more details &amp; matching</td></tr> <tr> <td>6</td><td>RR has fewer details &amp; matching</td></tr> <tr> <td>7</td><td>Mismatched details</td></tr> <tr> <td>99</td><td>Cannot be determined</td></tr> </table> | 1 | Info missing in protocol | 2 | Info missing in result report | 3  | Info missing in both protocol & result report | 4 | Same level of details & matching | 5 | RR has more details & matching | 6 | RR has fewer details & matching | 7 | Mismatched details | 99 | Cannot be determined |
| 1                                                                                                  | Info missing in protocol                                                                                                                                                                                                                                                                                                                                                                                                                                                                                                                          |   |                          |   |                               |    |                                               |   |                                  |   |                                |   |                                 |   |                    |    |                      |
| 2                                                                                                  | Info missing in result report                                                                                                                                                                                                                                                                                                                                                                                                                                                                                                                     |   |                          |   |                               |    |                                               |   |                                  |   |                                |   |                                 |   |                    |    |                      |
| 3                                                                                                  | Info missing in both protocol & result report                                                                                                                                                                                                                                                                                                                                                                                                                                                                                                     |   |                          |   |                               |    |                                               |   |                                  |   |                                |   |                                 |   |                    |    |                      |
| 4                                                                                                  | Same level of details & matching                                                                                                                                                                                                                                                                                                                                                                                                                                                                                                                  |   |                          |   |                               |    |                                               |   |                                  |   |                                |   |                                 |   |                    |    |                      |
| 5                                                                                                  | RR has more details & matching                                                                                                                                                                                                                                                                                                                                                                                                                                                                                                                    |   |                          |   |                               |    |                                               |   |                                  |   |                                |   |                                 |   |                    |    |                      |
| 6                                                                                                  | RR has fewer details & matching                                                                                                                                                                                                                                                                                                                                                                                                                                                                                                                   |   |                          |   |                               |    |                                               |   |                                  |   |                                |   |                                 |   |                    |    |                      |
| 7                                                                                                  | Mismatched details                                                                                                                                                                                                                                                                                                                                                                                                                                                                                                                                |   |                          |   |                               |    |                                               |   |                                  |   |                                |   |                                 |   |                    |    |                      |
| 99                                                                                                 | Cannot be determined                                                                                                                                                                                                                                                                                                                                                                                                                                                                                                                              |   |                          |   |                               |    |                                               |   |                                  |   |                                |   |                                 |   |                    |    |                      |
| Was the discrepancy important?                                                                     | multiple-choice <table border="1"> <tr> <td>1</td><td>Potentially important</td></tr> </table>                                                                                                                                                                                                                                                                                                                                                                                                                                                    | 1 | Potentially important    |   |                               |    |                                               |   |                                  |   |                                |   |                                 |   |                    |    |                      |
| 1                                                                                                  | Potentially important                                                                                                                                                                                                                                                                                                                                                                                                                                                                                                                             |   |                          |   |                               |    |                                               |   |                                  |   |                                |   |                                 |   |                    |    |                      |

| Question                                                                                           | Options                                                                                                                                                                                                                                                                                                                                                                                                                                                                                                                                           |   |                          |    |                               |    |                                               |   |                                  |   |                                |   |                                 |   |                    |    |                      |
|----------------------------------------------------------------------------------------------------|---------------------------------------------------------------------------------------------------------------------------------------------------------------------------------------------------------------------------------------------------------------------------------------------------------------------------------------------------------------------------------------------------------------------------------------------------------------------------------------------------------------------------------------------------|---|--------------------------|----|-------------------------------|----|-----------------------------------------------|---|----------------------------------|---|--------------------------------|---|---------------------------------|---|--------------------|----|----------------------|
|                                                                                                    | <table border="1"> <tr> <td>0</td><td>Likely unimportant</td></tr> <tr> <td>99</td><td>Uncertain</td></tr> </table>                                                                                                                                                                                                                                                                                                                                                                                                                               | 0 | Likely unimportant       | 99 | Uncertain                     |    |                                               |   |                                  |   |                                |   |                                 |   |                    |    |                      |
| 0                                                                                                  | Likely unimportant                                                                                                                                                                                                                                                                                                                                                                                                                                                                                                                                |   |                          |    |                               |    |                                               |   |                                  |   |                                |   |                                 |   |                    |    |                      |
| 99                                                                                                 | Uncertain                                                                                                                                                                                                                                                                                                                                                                                                                                                                                                                                         |   |                          |    |                               |    |                                               |   |                                  |   |                                |   |                                 |   |                    |    |                      |
| Explain why you think there is a discrepancy and whether this discrepancy is potentially important | text                                                                                                                                                                                                                                                                                                                                                                                                                                                                                                                                              |   |                          |    |                               |    |                                               |   |                                  |   |                                |   |                                 |   |                    |    |                      |
| Did the authors provide justification for the change/discrepancy?                                  | multiple-choice <table border="1"> <tr> <td>1</td><td>Yes</td></tr> <tr> <td>0</td><td>No</td></tr> <tr> <td>99</td><td>Justification not needed</td></tr> </table>                                                                                                                                                                                                                                                                                                                                                                               | 1 | Yes                      | 0  | No                            | 99 | Justification not needed                      |   |                                  |   |                                |   |                                 |   |                    |    |                      |
| 1                                                                                                  | Yes                                                                                                                                                                                                                                                                                                                                                                                                                                                                                                                                               |   |                          |    |                               |    |                                               |   |                                  |   |                                |   |                                 |   |                    |    |                      |
| 0                                                                                                  | No                                                                                                                                                                                                                                                                                                                                                                                                                                                                                                                                                |   |                          |    |                               |    |                                               |   |                                  |   |                                |   |                                 |   |                    |    |                      |
| 99                                                                                                 | Justification not needed                                                                                                                                                                                                                                                                                                                                                                                                                                                                                                                          |   |                          |    |                               |    |                                               |   |                                  |   |                                |   |                                 |   |                    |    |                      |
| What was the justification provided by authors?                                                    | text                                                                                                                                                                                                                                                                                                                                                                                                                                                                                                                                              |   |                          |    |                               |    |                                               |   |                                  |   |                                |   |                                 |   |                    |    |                      |
| Was there any discrepancy in the number of data points in the time series?                         | multiple-choice <table border="1"> <tr> <td>1</td><td>Info missing in protocol</td></tr> <tr> <td>2</td><td>Info missing in result report</td></tr> <tr> <td>3</td><td>Info missing in both protocol &amp; result report</td></tr> <tr> <td>4</td><td>Same level of details &amp; matching</td></tr> <tr> <td>5</td><td>RR has more details &amp; matching</td></tr> <tr> <td>6</td><td>RR has fewer details &amp; matching</td></tr> <tr> <td>7</td><td>Mismatched details</td></tr> <tr> <td>99</td><td>Cannot be determined</td></tr> </table> | 1 | Info missing in protocol | 2  | Info missing in result report | 3  | Info missing in both protocol & result report | 4 | Same level of details & matching | 5 | RR has more details & matching | 6 | RR has fewer details & matching | 7 | Mismatched details | 99 | Cannot be determined |
| 1                                                                                                  | Info missing in protocol                                                                                                                                                                                                                                                                                                                                                                                                                                                                                                                          |   |                          |    |                               |    |                                               |   |                                  |   |                                |   |                                 |   |                    |    |                      |
| 2                                                                                                  | Info missing in result report                                                                                                                                                                                                                                                                                                                                                                                                                                                                                                                     |   |                          |    |                               |    |                                               |   |                                  |   |                                |   |                                 |   |                    |    |                      |
| 3                                                                                                  | Info missing in both protocol & result report                                                                                                                                                                                                                                                                                                                                                                                                                                                                                                     |   |                          |    |                               |    |                                               |   |                                  |   |                                |   |                                 |   |                    |    |                      |
| 4                                                                                                  | Same level of details & matching                                                                                                                                                                                                                                                                                                                                                                                                                                                                                                                  |   |                          |    |                               |    |                                               |   |                                  |   |                                |   |                                 |   |                    |    |                      |
| 5                                                                                                  | RR has more details & matching                                                                                                                                                                                                                                                                                                                                                                                                                                                                                                                    |   |                          |    |                               |    |                                               |   |                                  |   |                                |   |                                 |   |                    |    |                      |
| 6                                                                                                  | RR has fewer details & matching                                                                                                                                                                                                                                                                                                                                                                                                                                                                                                                   |   |                          |    |                               |    |                                               |   |                                  |   |                                |   |                                 |   |                    |    |                      |
| 7                                                                                                  | Mismatched details                                                                                                                                                                                                                                                                                                                                                                                                                                                                                                                                |   |                          |    |                               |    |                                               |   |                                  |   |                                |   |                                 |   |                    |    |                      |
| 99                                                                                                 | Cannot be determined                                                                                                                                                                                                                                                                                                                                                                                                                                                                                                                              |   |                          |    |                               |    |                                               |   |                                  |   |                                |   |                                 |   |                    |    |                      |
| Was the discrepancy important?                                                                     | multiple-choice <table border="1"> <tr> <td>1</td><td>Potentially important</td></tr> <tr> <td>0</td><td>Likely unimportant</td></tr> <tr> <td>99</td><td>Uncertain</td></tr> </table>                                                                                                                                                                                                                                                                                                                                                            | 1 | Potentially important    | 0  | Likely unimportant            | 99 | Uncertain                                     |   |                                  |   |                                |   |                                 |   |                    |    |                      |
| 1                                                                                                  | Potentially important                                                                                                                                                                                                                                                                                                                                                                                                                                                                                                                             |   |                          |    |                               |    |                                               |   |                                  |   |                                |   |                                 |   |                    |    |                      |
| 0                                                                                                  | Likely unimportant                                                                                                                                                                                                                                                                                                                                                                                                                                                                                                                                |   |                          |    |                               |    |                                               |   |                                  |   |                                |   |                                 |   |                    |    |                      |
| 99                                                                                                 | Uncertain                                                                                                                                                                                                                                                                                                                                                                                                                                                                                                                                         |   |                          |    |                               |    |                                               |   |                                  |   |                                |   |                                 |   |                    |    |                      |

| Question                                                                                           | Options                                                                                                                                                                                                                                                                                                                                                                                                                                                                                                                                           |   |                          |   |                               |    |                                               |   |                                  |   |                                |   |                                 |   |                    |    |                      |
|----------------------------------------------------------------------------------------------------|---------------------------------------------------------------------------------------------------------------------------------------------------------------------------------------------------------------------------------------------------------------------------------------------------------------------------------------------------------------------------------------------------------------------------------------------------------------------------------------------------------------------------------------------------|---|--------------------------|---|-------------------------------|----|-----------------------------------------------|---|----------------------------------|---|--------------------------------|---|---------------------------------|---|--------------------|----|----------------------|
| Explain why you think there is a discrepancy and whether this discrepancy is potentially important | text                                                                                                                                                                                                                                                                                                                                                                                                                                                                                                                                              |   |                          |   |                               |    |                                               |   |                                  |   |                                |   |                                 |   |                    |    |                      |
| Did the authors provide justification for the change/discrepancy?                                  | multiple-choice <table border="1"> <tr> <td>1</td><td>Yes</td></tr> <tr> <td>0</td><td>No</td></tr> <tr> <td>99</td><td>Justification not needed</td></tr> </table>                                                                                                                                                                                                                                                                                                                                                                               | 1 | Yes                      | 0 | No                            | 99 | Justification not needed                      |   |                                  |   |                                |   |                                 |   |                    |    |                      |
| 1                                                                                                  | Yes                                                                                                                                                                                                                                                                                                                                                                                                                                                                                                                                               |   |                          |   |                               |    |                                               |   |                                  |   |                                |   |                                 |   |                    |    |                      |
| 0                                                                                                  | No                                                                                                                                                                                                                                                                                                                                                                                                                                                                                                                                                |   |                          |   |                               |    |                                               |   |                                  |   |                                |   |                                 |   |                    |    |                      |
| 99                                                                                                 | Justification not needed                                                                                                                                                                                                                                                                                                                                                                                                                                                                                                                          |   |                          |   |                               |    |                                               |   |                                  |   |                                |   |                                 |   |                    |    |                      |
| What was the justification provided by authors?                                                    | text                                                                                                                                                                                                                                                                                                                                                                                                                                                                                                                                              |   |                          |   |                               |    |                                               |   |                                  |   |                                |   |                                 |   |                    |    |                      |
| Was there any discrepancy in the start and end dates of the segments in the time series?           | multiple-choice <table border="1"> <tr> <td>1</td><td>Info missing in protocol</td></tr> <tr> <td>2</td><td>Info missing in result report</td></tr> <tr> <td>3</td><td>Info missing in both protocol &amp; result report</td></tr> <tr> <td>4</td><td>Same level of details &amp; matching</td></tr> <tr> <td>5</td><td>RR has more details &amp; matching</td></tr> <tr> <td>6</td><td>RR has fewer details &amp; matching</td></tr> <tr> <td>7</td><td>Mismatched details</td></tr> <tr> <td>99</td><td>Cannot be determined</td></tr> </table> | 1 | Info missing in protocol | 2 | Info missing in result report | 3  | Info missing in both protocol & result report | 4 | Same level of details & matching | 5 | RR has more details & matching | 6 | RR has fewer details & matching | 7 | Mismatched details | 99 | Cannot be determined |
| 1                                                                                                  | Info missing in protocol                                                                                                                                                                                                                                                                                                                                                                                                                                                                                                                          |   |                          |   |                               |    |                                               |   |                                  |   |                                |   |                                 |   |                    |    |                      |
| 2                                                                                                  | Info missing in result report                                                                                                                                                                                                                                                                                                                                                                                                                                                                                                                     |   |                          |   |                               |    |                                               |   |                                  |   |                                |   |                                 |   |                    |    |                      |
| 3                                                                                                  | Info missing in both protocol & result report                                                                                                                                                                                                                                                                                                                                                                                                                                                                                                     |   |                          |   |                               |    |                                               |   |                                  |   |                                |   |                                 |   |                    |    |                      |
| 4                                                                                                  | Same level of details & matching                                                                                                                                                                                                                                                                                                                                                                                                                                                                                                                  |   |                          |   |                               |    |                                               |   |                                  |   |                                |   |                                 |   |                    |    |                      |
| 5                                                                                                  | RR has more details & matching                                                                                                                                                                                                                                                                                                                                                                                                                                                                                                                    |   |                          |   |                               |    |                                               |   |                                  |   |                                |   |                                 |   |                    |    |                      |
| 6                                                                                                  | RR has fewer details & matching                                                                                                                                                                                                                                                                                                                                                                                                                                                                                                                   |   |                          |   |                               |    |                                               |   |                                  |   |                                |   |                                 |   |                    |    |                      |
| 7                                                                                                  | Mismatched details                                                                                                                                                                                                                                                                                                                                                                                                                                                                                                                                |   |                          |   |                               |    |                                               |   |                                  |   |                                |   |                                 |   |                    |    |                      |
| 99                                                                                                 | Cannot be determined                                                                                                                                                                                                                                                                                                                                                                                                                                                                                                                              |   |                          |   |                               |    |                                               |   |                                  |   |                                |   |                                 |   |                    |    |                      |
| Was the discrepancy important?                                                                     | multiple-choice <table border="1"> <tr> <td>1</td><td>Potentially important</td></tr> <tr> <td>0</td><td>Likely unimportant</td></tr> <tr> <td>99</td><td>Uncertain</td></tr> </table>                                                                                                                                                                                                                                                                                                                                                            | 1 | Potentially important    | 0 | Likely unimportant            | 99 | Uncertain                                     |   |                                  |   |                                |   |                                 |   |                    |    |                      |
| 1                                                                                                  | Potentially important                                                                                                                                                                                                                                                                                                                                                                                                                                                                                                                             |   |                          |   |                               |    |                                               |   |                                  |   |                                |   |                                 |   |                    |    |                      |
| 0                                                                                                  | Likely unimportant                                                                                                                                                                                                                                                                                                                                                                                                                                                                                                                                |   |                          |   |                               |    |                                               |   |                                  |   |                                |   |                                 |   |                    |    |                      |
| 99                                                                                                 | Uncertain                                                                                                                                                                                                                                                                                                                                                                                                                                                                                                                                         |   |                          |   |                               |    |                                               |   |                                  |   |                                |   |                                 |   |                    |    |                      |
| Explain why you think there is a discrepancy and whether this discrepancy is potentially important | text                                                                                                                                                                                                                                                                                                                                                                                                                                                                                                                                              |   |                          |   |                               |    |                                               |   |                                  |   |                                |   |                                 |   |                    |    |                      |
| Did the authors provide justification for the change/discrepancy?                                  | multiple-choice                                                                                                                                                                                                                                                                                                                                                                                                                                                                                                                                   |   |                          |   |                               |    |                                               |   |                                  |   |                                |   |                                 |   |                    |    |                      |

| Question                                                                                           | Options                                                                                                                                                                                                                                                                                                                                                                                                                                                                                                                                           |   |                          |   |                               |    |                                               |   |                                  |   |                                |   |                                 |   |                    |    |                      |
|----------------------------------------------------------------------------------------------------|---------------------------------------------------------------------------------------------------------------------------------------------------------------------------------------------------------------------------------------------------------------------------------------------------------------------------------------------------------------------------------------------------------------------------------------------------------------------------------------------------------------------------------------------------|---|--------------------------|---|-------------------------------|----|-----------------------------------------------|---|----------------------------------|---|--------------------------------|---|---------------------------------|---|--------------------|----|----------------------|
|                                                                                                    | <table border="1"> <tr> <td>1</td><td>Yes</td></tr> <tr> <td>0</td><td>No</td></tr> <tr> <td>99</td><td>Justification not needed</td></tr> </table>                                                                                                                                                                                                                                                                                                                                                                                               | 1 | Yes                      | 0 | No                            | 99 | Justification not needed                      |   |                                  |   |                                |   |                                 |   |                    |    |                      |
| 1                                                                                                  | Yes                                                                                                                                                                                                                                                                                                                                                                                                                                                                                                                                               |   |                          |   |                               |    |                                               |   |                                  |   |                                |   |                                 |   |                    |    |                      |
| 0                                                                                                  | No                                                                                                                                                                                                                                                                                                                                                                                                                                                                                                                                                |   |                          |   |                               |    |                                               |   |                                  |   |                                |   |                                 |   |                    |    |                      |
| 99                                                                                                 | Justification not needed                                                                                                                                                                                                                                                                                                                                                                                                                                                                                                                          |   |                          |   |                               |    |                                               |   |                                  |   |                                |   |                                 |   |                    |    |                      |
| What was the justification provided by authors?                                                    | text                                                                                                                                                                                                                                                                                                                                                                                                                                                                                                                                              |   |                          |   |                               |    |                                               |   |                                  |   |                                |   |                                 |   |                    |    |                      |
| Was there any discrepancy in the number of data points per segment in the time series?             | multiple-choice <table border="1"> <tr> <td>1</td><td>Info missing in protocol</td></tr> <tr> <td>2</td><td>Info missing in result report</td></tr> <tr> <td>3</td><td>Info missing in both protocol &amp; result report</td></tr> <tr> <td>4</td><td>Same level of details &amp; matching</td></tr> <tr> <td>5</td><td>RR has more details &amp; matching</td></tr> <tr> <td>6</td><td>RR has fewer details &amp; matching</td></tr> <tr> <td>7</td><td>Mismatched details</td></tr> <tr> <td>99</td><td>Cannot be determined</td></tr> </table> | 1 | Info missing in protocol | 2 | Info missing in result report | 3  | Info missing in both protocol & result report | 4 | Same level of details & matching | 5 | RR has more details & matching | 6 | RR has fewer details & matching | 7 | Mismatched details | 99 | Cannot be determined |
| 1                                                                                                  | Info missing in protocol                                                                                                                                                                                                                                                                                                                                                                                                                                                                                                                          |   |                          |   |                               |    |                                               |   |                                  |   |                                |   |                                 |   |                    |    |                      |
| 2                                                                                                  | Info missing in result report                                                                                                                                                                                                                                                                                                                                                                                                                                                                                                                     |   |                          |   |                               |    |                                               |   |                                  |   |                                |   |                                 |   |                    |    |                      |
| 3                                                                                                  | Info missing in both protocol & result report                                                                                                                                                                                                                                                                                                                                                                                                                                                                                                     |   |                          |   |                               |    |                                               |   |                                  |   |                                |   |                                 |   |                    |    |                      |
| 4                                                                                                  | Same level of details & matching                                                                                                                                                                                                                                                                                                                                                                                                                                                                                                                  |   |                          |   |                               |    |                                               |   |                                  |   |                                |   |                                 |   |                    |    |                      |
| 5                                                                                                  | RR has more details & matching                                                                                                                                                                                                                                                                                                                                                                                                                                                                                                                    |   |                          |   |                               |    |                                               |   |                                  |   |                                |   |                                 |   |                    |    |                      |
| 6                                                                                                  | RR has fewer details & matching                                                                                                                                                                                                                                                                                                                                                                                                                                                                                                                   |   |                          |   |                               |    |                                               |   |                                  |   |                                |   |                                 |   |                    |    |                      |
| 7                                                                                                  | Mismatched details                                                                                                                                                                                                                                                                                                                                                                                                                                                                                                                                |   |                          |   |                               |    |                                               |   |                                  |   |                                |   |                                 |   |                    |    |                      |
| 99                                                                                                 | Cannot be determined                                                                                                                                                                                                                                                                                                                                                                                                                                                                                                                              |   |                          |   |                               |    |                                               |   |                                  |   |                                |   |                                 |   |                    |    |                      |
| Was the discrepancy important?                                                                     | multiple-choice <table border="1"> <tr> <td>1</td><td>Potentially important</td></tr> <tr> <td>0</td><td>Likely unimportant</td></tr> <tr> <td>99</td><td>Uncertain</td></tr> </table>                                                                                                                                                                                                                                                                                                                                                            | 1 | Potentially important    | 0 | Likely unimportant            | 99 | Uncertain                                     |   |                                  |   |                                |   |                                 |   |                    |    |                      |
| 1                                                                                                  | Potentially important                                                                                                                                                                                                                                                                                                                                                                                                                                                                                                                             |   |                          |   |                               |    |                                               |   |                                  |   |                                |   |                                 |   |                    |    |                      |
| 0                                                                                                  | Likely unimportant                                                                                                                                                                                                                                                                                                                                                                                                                                                                                                                                |   |                          |   |                               |    |                                               |   |                                  |   |                                |   |                                 |   |                    |    |                      |
| 99                                                                                                 | Uncertain                                                                                                                                                                                                                                                                                                                                                                                                                                                                                                                                         |   |                          |   |                               |    |                                               |   |                                  |   |                                |   |                                 |   |                    |    |                      |
| Explain why you think there is a discrepancy and whether this discrepancy is potentially important | text                                                                                                                                                                                                                                                                                                                                                                                                                                                                                                                                              |   |                          |   |                               |    |                                               |   |                                  |   |                                |   |                                 |   |                    |    |                      |
| Did the authors provide justification for the change/discrepancy?                                  | multiple-choice <table border="1"> <tr> <td>1</td><td>Yes</td></tr> <tr> <td>0</td><td>No</td></tr> </table>                                                                                                                                                                                                                                                                                                                                                                                                                                      | 1 | Yes                      | 0 | No                            |    |                                               |   |                                  |   |                                |   |                                 |   |                    |    |                      |
| 1                                                                                                  | Yes                                                                                                                                                                                                                                                                                                                                                                                                                                                                                                                                               |   |                          |   |                               |    |                                               |   |                                  |   |                                |   |                                 |   |                    |    |                      |
| 0                                                                                                  | No                                                                                                                                                                                                                                                                                                                                                                                                                                                                                                                                                |   |                          |   |                               |    |                                               |   |                                  |   |                                |   |                                 |   |                    |    |                      |

| Question                                                                                           | Options                                                                                                                                                                                                                                                                                                                                                                                                                                                                                                                                           |    |                          |   |                               |    |                                               |   |                                  |   |                                |   |                                 |   |                    |    |                      |
|----------------------------------------------------------------------------------------------------|---------------------------------------------------------------------------------------------------------------------------------------------------------------------------------------------------------------------------------------------------------------------------------------------------------------------------------------------------------------------------------------------------------------------------------------------------------------------------------------------------------------------------------------------------|----|--------------------------|---|-------------------------------|----|-----------------------------------------------|---|----------------------------------|---|--------------------------------|---|---------------------------------|---|--------------------|----|----------------------|
|                                                                                                    | <table border="1"> <tr> <td>99</td><td>Justification not needed</td></tr> </table>                                                                                                                                                                                                                                                                                                                                                                                                                                                                | 99 | Justification not needed |   |                               |    |                                               |   |                                  |   |                                |   |                                 |   |                    |    |                      |
| 99                                                                                                 | Justification not needed                                                                                                                                                                                                                                                                                                                                                                                                                                                                                                                          |    |                          |   |                               |    |                                               |   |                                  |   |                                |   |                                 |   |                    |    |                      |
| What was the justification provided by authors?                                                    | text                                                                                                                                                                                                                                                                                                                                                                                                                                                                                                                                              |    |                          |   |                               |    |                                               |   |                                  |   |                                |   |                                 |   |                    |    |                      |
| Was there any discrepancy in how the intervention was modelled?                                    | multiple-choice <table border="1"> <tr> <td>1</td><td>Info missing in protocol</td></tr> <tr> <td>2</td><td>Info missing in result report</td></tr> <tr> <td>3</td><td>Info missing in both protocol &amp; result report</td></tr> <tr> <td>4</td><td>Same level of details &amp; matching</td></tr> <tr> <td>5</td><td>RR has more details &amp; matching</td></tr> <tr> <td>6</td><td>RR has fewer details &amp; matching</td></tr> <tr> <td>7</td><td>Mismatched details</td></tr> <tr> <td>99</td><td>Cannot be determined</td></tr> </table> | 1  | Info missing in protocol | 2 | Info missing in result report | 3  | Info missing in both protocol & result report | 4 | Same level of details & matching | 5 | RR has more details & matching | 6 | RR has fewer details & matching | 7 | Mismatched details | 99 | Cannot be determined |
| 1                                                                                                  | Info missing in protocol                                                                                                                                                                                                                                                                                                                                                                                                                                                                                                                          |    |                          |   |                               |    |                                               |   |                                  |   |                                |   |                                 |   |                    |    |                      |
| 2                                                                                                  | Info missing in result report                                                                                                                                                                                                                                                                                                                                                                                                                                                                                                                     |    |                          |   |                               |    |                                               |   |                                  |   |                                |   |                                 |   |                    |    |                      |
| 3                                                                                                  | Info missing in both protocol & result report                                                                                                                                                                                                                                                                                                                                                                                                                                                                                                     |    |                          |   |                               |    |                                               |   |                                  |   |                                |   |                                 |   |                    |    |                      |
| 4                                                                                                  | Same level of details & matching                                                                                                                                                                                                                                                                                                                                                                                                                                                                                                                  |    |                          |   |                               |    |                                               |   |                                  |   |                                |   |                                 |   |                    |    |                      |
| 5                                                                                                  | RR has more details & matching                                                                                                                                                                                                                                                                                                                                                                                                                                                                                                                    |    |                          |   |                               |    |                                               |   |                                  |   |                                |   |                                 |   |                    |    |                      |
| 6                                                                                                  | RR has fewer details & matching                                                                                                                                                                                                                                                                                                                                                                                                                                                                                                                   |    |                          |   |                               |    |                                               |   |                                  |   |                                |   |                                 |   |                    |    |                      |
| 7                                                                                                  | Mismatched details                                                                                                                                                                                                                                                                                                                                                                                                                                                                                                                                |    |                          |   |                               |    |                                               |   |                                  |   |                                |   |                                 |   |                    |    |                      |
| 99                                                                                                 | Cannot be determined                                                                                                                                                                                                                                                                                                                                                                                                                                                                                                                              |    |                          |   |                               |    |                                               |   |                                  |   |                                |   |                                 |   |                    |    |                      |
| Was the discrepancy important?                                                                     | multiple-choice <table border="1"> <tr> <td>1</td><td>Potentially important</td></tr> <tr> <td>0</td><td>Likely unimportant</td></tr> <tr> <td>99</td><td>Uncertain</td></tr> </table>                                                                                                                                                                                                                                                                                                                                                            | 1  | Potentially important    | 0 | Likely unimportant            | 99 | Uncertain                                     |   |                                  |   |                                |   |                                 |   |                    |    |                      |
| 1                                                                                                  | Potentially important                                                                                                                                                                                                                                                                                                                                                                                                                                                                                                                             |    |                          |   |                               |    |                                               |   |                                  |   |                                |   |                                 |   |                    |    |                      |
| 0                                                                                                  | Likely unimportant                                                                                                                                                                                                                                                                                                                                                                                                                                                                                                                                |    |                          |   |                               |    |                                               |   |                                  |   |                                |   |                                 |   |                    |    |                      |
| 99                                                                                                 | Uncertain                                                                                                                                                                                                                                                                                                                                                                                                                                                                                                                                         |    |                          |   |                               |    |                                               |   |                                  |   |                                |   |                                 |   |                    |    |                      |
| Explain why you think there is a discrepancy and whether this discrepancy is potentially important | text                                                                                                                                                                                                                                                                                                                                                                                                                                                                                                                                              |    |                          |   |                               |    |                                               |   |                                  |   |                                |   |                                 |   |                    |    |                      |
| Did the authors provide justification for the change/discrepancy?                                  | multiple-choice <table border="1"> <tr> <td>1</td><td>Yes</td></tr> <tr> <td>0</td><td>No</td></tr> <tr> <td>99</td><td>Justification not needed</td></tr> </table>                                                                                                                                                                                                                                                                                                                                                                               | 1  | Yes                      | 0 | No                            | 99 | Justification not needed                      |   |                                  |   |                                |   |                                 |   |                    |    |                      |
| 1                                                                                                  | Yes                                                                                                                                                                                                                                                                                                                                                                                                                                                                                                                                               |    |                          |   |                               |    |                                               |   |                                  |   |                                |   |                                 |   |                    |    |                      |
| 0                                                                                                  | No                                                                                                                                                                                                                                                                                                                                                                                                                                                                                                                                                |    |                          |   |                               |    |                                               |   |                                  |   |                                |   |                                 |   |                    |    |                      |
| 99                                                                                                 | Justification not needed                                                                                                                                                                                                                                                                                                                                                                                                                                                                                                                          |    |                          |   |                               |    |                                               |   |                                  |   |                                |   |                                 |   |                    |    |                      |
| What was the justification provided by authors?                                                    | text                                                                                                                                                                                                                                                                                                                                                                                                                                                                                                                                              |    |                          |   |                               |    |                                               |   |                                  |   |                                |   |                                 |   |                    |    |                      |

| Question                                                                                           | Options                                                                                                                                                                                                                                                                                                                                                                                                                                                                                                                                   |   |                          |   |                               |    |                                               |   |                                  |   |                                |   |                                 |   |                    |    |                      |
|----------------------------------------------------------------------------------------------------|-------------------------------------------------------------------------------------------------------------------------------------------------------------------------------------------------------------------------------------------------------------------------------------------------------------------------------------------------------------------------------------------------------------------------------------------------------------------------------------------------------------------------------------------|---|--------------------------|---|-------------------------------|----|-----------------------------------------------|---|----------------------------------|---|--------------------------------|---|---------------------------------|---|--------------------|----|----------------------|
| Was there any discrepancy in the start and end dates of the segments in the ITS model?             | multiple-choice <table border="1"> <tr><td>1</td><td>Info missing in protocol</td></tr> <tr><td>2</td><td>Info missing in result report</td></tr> <tr><td>3</td><td>Info missing in both protocol &amp; result report</td></tr> <tr><td>4</td><td>Same level of details &amp; matching</td></tr> <tr><td>5</td><td>RR has more details &amp; matching</td></tr> <tr><td>6</td><td>RR has fewer details &amp; matching</td></tr> <tr><td>7</td><td>Mismatched details</td></tr> <tr><td>99</td><td>Cannot be determined</td></tr> </table> | 1 | Info missing in protocol | 2 | Info missing in result report | 3  | Info missing in both protocol & result report | 4 | Same level of details & matching | 5 | RR has more details & matching | 6 | RR has fewer details & matching | 7 | Mismatched details | 99 | Cannot be determined |
| 1                                                                                                  | Info missing in protocol                                                                                                                                                                                                                                                                                                                                                                                                                                                                                                                  |   |                          |   |                               |    |                                               |   |                                  |   |                                |   |                                 |   |                    |    |                      |
| 2                                                                                                  | Info missing in result report                                                                                                                                                                                                                                                                                                                                                                                                                                                                                                             |   |                          |   |                               |    |                                               |   |                                  |   |                                |   |                                 |   |                    |    |                      |
| 3                                                                                                  | Info missing in both protocol & result report                                                                                                                                                                                                                                                                                                                                                                                                                                                                                             |   |                          |   |                               |    |                                               |   |                                  |   |                                |   |                                 |   |                    |    |                      |
| 4                                                                                                  | Same level of details & matching                                                                                                                                                                                                                                                                                                                                                                                                                                                                                                          |   |                          |   |                               |    |                                               |   |                                  |   |                                |   |                                 |   |                    |    |                      |
| 5                                                                                                  | RR has more details & matching                                                                                                                                                                                                                                                                                                                                                                                                                                                                                                            |   |                          |   |                               |    |                                               |   |                                  |   |                                |   |                                 |   |                    |    |                      |
| 6                                                                                                  | RR has fewer details & matching                                                                                                                                                                                                                                                                                                                                                                                                                                                                                                           |   |                          |   |                               |    |                                               |   |                                  |   |                                |   |                                 |   |                    |    |                      |
| 7                                                                                                  | Mismatched details                                                                                                                                                                                                                                                                                                                                                                                                                                                                                                                        |   |                          |   |                               |    |                                               |   |                                  |   |                                |   |                                 |   |                    |    |                      |
| 99                                                                                                 | Cannot be determined                                                                                                                                                                                                                                                                                                                                                                                                                                                                                                                      |   |                          |   |                               |    |                                               |   |                                  |   |                                |   |                                 |   |                    |    |                      |
| Was the discrepancy important?                                                                     | multiple-choice <table border="1"> <tr><td>1</td><td>Potentially important</td></tr> <tr><td>0</td><td>Likely unimportant</td></tr> <tr><td>99</td><td>Uncertain</td></tr> </table>                                                                                                                                                                                                                                                                                                                                                       | 1 | Potentially important    | 0 | Likely unimportant            | 99 | Uncertain                                     |   |                                  |   |                                |   |                                 |   |                    |    |                      |
| 1                                                                                                  | Potentially important                                                                                                                                                                                                                                                                                                                                                                                                                                                                                                                     |   |                          |   |                               |    |                                               |   |                                  |   |                                |   |                                 |   |                    |    |                      |
| 0                                                                                                  | Likely unimportant                                                                                                                                                                                                                                                                                                                                                                                                                                                                                                                        |   |                          |   |                               |    |                                               |   |                                  |   |                                |   |                                 |   |                    |    |                      |
| 99                                                                                                 | Uncertain                                                                                                                                                                                                                                                                                                                                                                                                                                                                                                                                 |   |                          |   |                               |    |                                               |   |                                  |   |                                |   |                                 |   |                    |    |                      |
| Explain why you think there is a discrepancy and whether this discrepancy is potentially important | text                                                                                                                                                                                                                                                                                                                                                                                                                                                                                                                                      |   |                          |   |                               |    |                                               |   |                                  |   |                                |   |                                 |   |                    |    |                      |
| Did the authors provide justification for the change/discrepancy?                                  | multiple-choice <table border="1"> <tr><td>1</td><td>Yes</td></tr> <tr><td>0</td><td>No</td></tr> <tr><td>99</td><td>Justification not needed</td></tr> </table>                                                                                                                                                                                                                                                                                                                                                                          | 1 | Yes                      | 0 | No                            | 99 | Justification not needed                      |   |                                  |   |                                |   |                                 |   |                    |    |                      |
| 1                                                                                                  | Yes                                                                                                                                                                                                                                                                                                                                                                                                                                                                                                                                       |   |                          |   |                               |    |                                               |   |                                  |   |                                |   |                                 |   |                    |    |                      |
| 0                                                                                                  | No                                                                                                                                                                                                                                                                                                                                                                                                                                                                                                                                        |   |                          |   |                               |    |                                               |   |                                  |   |                                |   |                                 |   |                    |    |                      |
| 99                                                                                                 | Justification not needed                                                                                                                                                                                                                                                                                                                                                                                                                                                                                                                  |   |                          |   |                               |    |                                               |   |                                  |   |                                |   |                                 |   |                    |    |                      |
| What was the justification provided by authors?                                                    | text                                                                                                                                                                                                                                                                                                                                                                                                                                                                                                                                      |   |                          |   |                               |    |                                               |   |                                  |   |                                |   |                                 |   |                    |    |                      |
| Was there any discrepancy in the number of data points per segment in the ITS model?               | multiple-choice <table border="1"> <tr><td>1</td><td>Info missing in protocol</td></tr> </table>                                                                                                                                                                                                                                                                                                                                                                                                                                          | 1 | Info missing in protocol |   |                               |    |                                               |   |                                  |   |                                |   |                                 |   |                    |    |                      |
| 1                                                                                                  | Info missing in protocol                                                                                                                                                                                                                                                                                                                                                                                                                                                                                                                  |   |                          |   |                               |    |                                               |   |                                  |   |                                |   |                                 |   |                    |    |                      |

| Question                                                                                           | Options                                                                                                                                                                                                                                                                                                                                                                                                                                                   |   |                               |   |                                               |    |                                               |   |                                |   |                                 |   |                    |    |                      |
|----------------------------------------------------------------------------------------------------|-----------------------------------------------------------------------------------------------------------------------------------------------------------------------------------------------------------------------------------------------------------------------------------------------------------------------------------------------------------------------------------------------------------------------------------------------------------|---|-------------------------------|---|-----------------------------------------------|----|-----------------------------------------------|---|--------------------------------|---|---------------------------------|---|--------------------|----|----------------------|
|                                                                                                    | <table> <tr><td>2</td><td>Info missing in result report</td></tr> <tr><td>3</td><td>Info missing in both protocol &amp; result report</td></tr> <tr><td>4</td><td>Same level of details &amp; matching</td></tr> <tr><td>5</td><td>RR has more details &amp; matching</td></tr> <tr><td>6</td><td>RR has fewer details &amp; matching</td></tr> <tr><td>7</td><td>Mismatched details</td></tr> <tr><td>99</td><td>Cannot be determined</td></tr> </table> | 2 | Info missing in result report | 3 | Info missing in both protocol & result report | 4  | Same level of details & matching              | 5 | RR has more details & matching | 6 | RR has fewer details & matching | 7 | Mismatched details | 99 | Cannot be determined |
| 2                                                                                                  | Info missing in result report                                                                                                                                                                                                                                                                                                                                                                                                                             |   |                               |   |                                               |    |                                               |   |                                |   |                                 |   |                    |    |                      |
| 3                                                                                                  | Info missing in both protocol & result report                                                                                                                                                                                                                                                                                                                                                                                                             |   |                               |   |                                               |    |                                               |   |                                |   |                                 |   |                    |    |                      |
| 4                                                                                                  | Same level of details & matching                                                                                                                                                                                                                                                                                                                                                                                                                          |   |                               |   |                                               |    |                                               |   |                                |   |                                 |   |                    |    |                      |
| 5                                                                                                  | RR has more details & matching                                                                                                                                                                                                                                                                                                                                                                                                                            |   |                               |   |                                               |    |                                               |   |                                |   |                                 |   |                    |    |                      |
| 6                                                                                                  | RR has fewer details & matching                                                                                                                                                                                                                                                                                                                                                                                                                           |   |                               |   |                                               |    |                                               |   |                                |   |                                 |   |                    |    |                      |
| 7                                                                                                  | Mismatched details                                                                                                                                                                                                                                                                                                                                                                                                                                        |   |                               |   |                                               |    |                                               |   |                                |   |                                 |   |                    |    |                      |
| 99                                                                                                 | Cannot be determined                                                                                                                                                                                                                                                                                                                                                                                                                                      |   |                               |   |                                               |    |                                               |   |                                |   |                                 |   |                    |    |                      |
| Was the discrepancy important?                                                                     | multiple-choice <table> <tr><td>1</td><td>Potentially important</td></tr> <tr><td>0</td><td>Likely unimportant</td></tr> <tr><td>99</td><td>Uncertain</td></tr> </table>                                                                                                                                                                                                                                                                                  | 1 | Potentially important         | 0 | Likely unimportant                            | 99 | Uncertain                                     |   |                                |   |                                 |   |                    |    |                      |
| 1                                                                                                  | Potentially important                                                                                                                                                                                                                                                                                                                                                                                                                                     |   |                               |   |                                               |    |                                               |   |                                |   |                                 |   |                    |    |                      |
| 0                                                                                                  | Likely unimportant                                                                                                                                                                                                                                                                                                                                                                                                                                        |   |                               |   |                                               |    |                                               |   |                                |   |                                 |   |                    |    |                      |
| 99                                                                                                 | Uncertain                                                                                                                                                                                                                                                                                                                                                                                                                                                 |   |                               |   |                                               |    |                                               |   |                                |   |                                 |   |                    |    |                      |
| Explain why you think there is a discrepancy and whether this discrepancy is potentially important | text                                                                                                                                                                                                                                                                                                                                                                                                                                                      |   |                               |   |                                               |    |                                               |   |                                |   |                                 |   |                    |    |                      |
| Did the authors provide justification for the change/discrepancy?                                  | multiple-choice <table> <tr><td>1</td><td>Yes</td></tr> <tr><td>0</td><td>No</td></tr> <tr><td>99</td><td>Justification not needed</td></tr> </table>                                                                                                                                                                                                                                                                                                     | 1 | Yes                           | 0 | No                                            | 99 | Justification not needed                      |   |                                |   |                                 |   |                    |    |                      |
| 1                                                                                                  | Yes                                                                                                                                                                                                                                                                                                                                                                                                                                                       |   |                               |   |                                               |    |                                               |   |                                |   |                                 |   |                    |    |                      |
| 0                                                                                                  | No                                                                                                                                                                                                                                                                                                                                                                                                                                                        |   |                               |   |                                               |    |                                               |   |                                |   |                                 |   |                    |    |                      |
| 99                                                                                                 | Justification not needed                                                                                                                                                                                                                                                                                                                                                                                                                                  |   |                               |   |                                               |    |                                               |   |                                |   |                                 |   |                    |    |                      |
| What was the justification provided by authors?                                                    | text                                                                                                                                                                                                                                                                                                                                                                                                                                                      |   |                               |   |                                               |    |                                               |   |                                |   |                                 |   |                    |    |                      |
| Was there any discrepancy in the segments that were compared to address the PRQ?                   | multiple-choice <table> <tr><td>1</td><td>Info missing in protocol</td></tr> <tr><td>2</td><td>Info missing in result report</td></tr> <tr><td>3</td><td>Info missing in both protocol &amp; result report</td></tr> </table>                                                                                                                                                                                                                             | 1 | Info missing in protocol      | 2 | Info missing in result report                 | 3  | Info missing in both protocol & result report |   |                                |   |                                 |   |                    |    |                      |
| 1                                                                                                  | Info missing in protocol                                                                                                                                                                                                                                                                                                                                                                                                                                  |   |                               |   |                                               |    |                                               |   |                                |   |                                 |   |                    |    |                      |
| 2                                                                                                  | Info missing in result report                                                                                                                                                                                                                                                                                                                                                                                                                             |   |                               |   |                                               |    |                                               |   |                                |   |                                 |   |                    |    |                      |
| 3                                                                                                  | Info missing in both protocol & result report                                                                                                                                                                                                                                                                                                                                                                                                             |   |                               |   |                                               |    |                                               |   |                                |   |                                 |   |                    |    |                      |



| Question                                                                                           | Options                                                                                                                                                                                                                                                                                                                                                                                 |   |                                  |   |                                |    |                                               |   |                                  |    |                                |
|----------------------------------------------------------------------------------------------------|-----------------------------------------------------------------------------------------------------------------------------------------------------------------------------------------------------------------------------------------------------------------------------------------------------------------------------------------------------------------------------------------|---|----------------------------------|---|--------------------------------|----|-----------------------------------------------|---|----------------------------------|----|--------------------------------|
|                                                                                                    | <table border="1"> <tr> <td>4</td> <td>Same level of details &amp; matching</td> </tr> <tr> <td>5</td> <td>RR has more details &amp; matching</td> </tr> <tr> <td>6</td> <td>RR has fewer details &amp; matching</td> </tr> <tr> <td>7</td> <td>Mismatched details</td> </tr> <tr> <td>99</td> <td>Cannot be determined</td> </tr> </table>                                             | 4 | Same level of details & matching | 5 | RR has more details & matching | 6  | RR has fewer details & matching               | 7 | Mismatched details               | 99 | Cannot be determined           |
| 4                                                                                                  | Same level of details & matching                                                                                                                                                                                                                                                                                                                                                        |   |                                  |   |                                |    |                                               |   |                                  |    |                                |
| 5                                                                                                  | RR has more details & matching                                                                                                                                                                                                                                                                                                                                                          |   |                                  |   |                                |    |                                               |   |                                  |    |                                |
| 6                                                                                                  | RR has fewer details & matching                                                                                                                                                                                                                                                                                                                                                         |   |                                  |   |                                |    |                                               |   |                                  |    |                                |
| 7                                                                                                  | Mismatched details                                                                                                                                                                                                                                                                                                                                                                      |   |                                  |   |                                |    |                                               |   |                                  |    |                                |
| 99                                                                                                 | Cannot be determined                                                                                                                                                                                                                                                                                                                                                                    |   |                                  |   |                                |    |                                               |   |                                  |    |                                |
| Was the discrepancy important?                                                                     | multiple-choice <table border="1"> <tr> <td>1</td> <td>Potentially important</td> </tr> <tr> <td>0</td> <td>Likely unimportant</td> </tr> <tr> <td>99</td> <td>Uncertain</td> </tr> </table>                                                                                                                                                                                            | 1 | Potentially important            | 0 | Likely unimportant             | 99 | Uncertain                                     |   |                                  |    |                                |
| 1                                                                                                  | Potentially important                                                                                                                                                                                                                                                                                                                                                                   |   |                                  |   |                                |    |                                               |   |                                  |    |                                |
| 0                                                                                                  | Likely unimportant                                                                                                                                                                                                                                                                                                                                                                      |   |                                  |   |                                |    |                                               |   |                                  |    |                                |
| 99                                                                                                 | Uncertain                                                                                                                                                                                                                                                                                                                                                                               |   |                                  |   |                                |    |                                               |   |                                  |    |                                |
| Explain why you think there is a discrepancy and whether this discrepancy is potentially important | text                                                                                                                                                                                                                                                                                                                                                                                    |   |                                  |   |                                |    |                                               |   |                                  |    |                                |
| Did the authors provide justification for the change/discrepancy?                                  | multiple-choice <table border="1"> <tr> <td>1</td> <td>Yes</td> </tr> <tr> <td>0</td> <td>No</td> </tr> <tr> <td>99</td> <td>Justification not needed</td> </tr> </table>                                                                                                                                                                                                               | 1 | Yes                              | 0 | No                             | 99 | Justification not needed                      |   |                                  |    |                                |
| 1                                                                                                  | Yes                                                                                                                                                                                                                                                                                                                                                                                     |   |                                  |   |                                |    |                                               |   |                                  |    |                                |
| 0                                                                                                  | No                                                                                                                                                                                                                                                                                                                                                                                      |   |                                  |   |                                |    |                                               |   |                                  |    |                                |
| 99                                                                                                 | Justification not needed                                                                                                                                                                                                                                                                                                                                                                |   |                                  |   |                                |    |                                               |   |                                  |    |                                |
| What was the justification provided by authors?                                                    | text                                                                                                                                                                                                                                                                                                                                                                                    |   |                                  |   |                                |    |                                               |   |                                  |    |                                |
| Was there any discrepancy in the type of effect measures reported?                                 | multiple-choice <table border="1"> <tr> <td>1</td> <td>Info missing in protocol</td> </tr> <tr> <td>2</td> <td>Info missing in result report</td> </tr> <tr> <td>3</td> <td>Info missing in both protocol &amp; result report</td> </tr> <tr> <td>4</td> <td>Same level of details &amp; matching</td> </tr> <tr> <td>5</td> <td>RR has more details &amp; matching</td> </tr> </table> | 1 | Info missing in protocol         | 2 | Info missing in result report  | 3  | Info missing in both protocol & result report | 4 | Same level of details & matching | 5  | RR has more details & matching |
| 1                                                                                                  | Info missing in protocol                                                                                                                                                                                                                                                                                                                                                                |   |                                  |   |                                |    |                                               |   |                                  |    |                                |
| 2                                                                                                  | Info missing in result report                                                                                                                                                                                                                                                                                                                                                           |   |                                  |   |                                |    |                                               |   |                                  |    |                                |
| 3                                                                                                  | Info missing in both protocol & result report                                                                                                                                                                                                                                                                                                                                           |   |                                  |   |                                |    |                                               |   |                                  |    |                                |
| 4                                                                                                  | Same level of details & matching                                                                                                                                                                                                                                                                                                                                                        |   |                                  |   |                                |    |                                               |   |                                  |    |                                |
| 5                                                                                                  | RR has more details & matching                                                                                                                                                                                                                                                                                                                                                          |   |                                  |   |                                |    |                                               |   |                                  |    |                                |

| Question                                                                                           | Options                                                                                                                                                                                                                                                                                                                                                                                                                                                                                                      |   |                                 |   |                               |    |                                               |   |                                  |   |                                |   |                                 |   |                    |
|----------------------------------------------------------------------------------------------------|--------------------------------------------------------------------------------------------------------------------------------------------------------------------------------------------------------------------------------------------------------------------------------------------------------------------------------------------------------------------------------------------------------------------------------------------------------------------------------------------------------------|---|---------------------------------|---|-------------------------------|----|-----------------------------------------------|---|----------------------------------|---|--------------------------------|---|---------------------------------|---|--------------------|
|                                                                                                    | <table border="1"> <tr> <td>6</td> <td>RR has fewer details &amp; matching</td> </tr> <tr> <td>7</td> <td>Mismatched details</td> </tr> <tr> <td>99</td> <td>Cannot be determined</td> </tr> </table>                                                                                                                                                                                                                                                                                                        | 6 | RR has fewer details & matching | 7 | Mismatched details            | 99 | Cannot be determined                          |   |                                  |   |                                |   |                                 |   |                    |
| 6                                                                                                  | RR has fewer details & matching                                                                                                                                                                                                                                                                                                                                                                                                                                                                              |   |                                 |   |                               |    |                                               |   |                                  |   |                                |   |                                 |   |                    |
| 7                                                                                                  | Mismatched details                                                                                                                                                                                                                                                                                                                                                                                                                                                                                           |   |                                 |   |                               |    |                                               |   |                                  |   |                                |   |                                 |   |                    |
| 99                                                                                                 | Cannot be determined                                                                                                                                                                                                                                                                                                                                                                                                                                                                                         |   |                                 |   |                               |    |                                               |   |                                  |   |                                |   |                                 |   |                    |
| Was the discrepancy important?                                                                     | multiple-choice <table border="1"> <tr> <td>1</td> <td>Potentially important</td> </tr> <tr> <td>0</td> <td>Likely unimportant</td> </tr> <tr> <td>99</td> <td>Uncertain</td> </tr> </table>                                                                                                                                                                                                                                                                                                                 | 1 | Potentially important           | 0 | Likely unimportant            | 99 | Uncertain                                     |   |                                  |   |                                |   |                                 |   |                    |
| 1                                                                                                  | Potentially important                                                                                                                                                                                                                                                                                                                                                                                                                                                                                        |   |                                 |   |                               |    |                                               |   |                                  |   |                                |   |                                 |   |                    |
| 0                                                                                                  | Likely unimportant                                                                                                                                                                                                                                                                                                                                                                                                                                                                                           |   |                                 |   |                               |    |                                               |   |                                  |   |                                |   |                                 |   |                    |
| 99                                                                                                 | Uncertain                                                                                                                                                                                                                                                                                                                                                                                                                                                                                                    |   |                                 |   |                               |    |                                               |   |                                  |   |                                |   |                                 |   |                    |
| Explain why you think there is a discrepancy and whether this discrepancy is potentially important | text                                                                                                                                                                                                                                                                                                                                                                                                                                                                                                         |   |                                 |   |                               |    |                                               |   |                                  |   |                                |   |                                 |   |                    |
| Did the authors provide justification for the change/discrepancy?                                  | multiple-choice <table border="1"> <tr> <td>1</td> <td>Yes</td> </tr> <tr> <td>0</td> <td>No</td> </tr> <tr> <td>99</td> <td>Justification not needed</td> </tr> </table>                                                                                                                                                                                                                                                                                                                                    | 1 | Yes                             | 0 | No                            | 99 | Justification not needed                      |   |                                  |   |                                |   |                                 |   |                    |
| 1                                                                                                  | Yes                                                                                                                                                                                                                                                                                                                                                                                                                                                                                                          |   |                                 |   |                               |    |                                               |   |                                  |   |                                |   |                                 |   |                    |
| 0                                                                                                  | No                                                                                                                                                                                                                                                                                                                                                                                                                                                                                                           |   |                                 |   |                               |    |                                               |   |                                  |   |                                |   |                                 |   |                    |
| 99                                                                                                 | Justification not needed                                                                                                                                                                                                                                                                                                                                                                                                                                                                                     |   |                                 |   |                               |    |                                               |   |                                  |   |                                |   |                                 |   |                    |
| What was the justification provided by authors?                                                    | text                                                                                                                                                                                                                                                                                                                                                                                                                                                                                                         |   |                                 |   |                               |    |                                               |   |                                  |   |                                |   |                                 |   |                    |
| Was there any discrepancy in the time interval of the aggregated data?                             | multiple-choice <table border="1"> <tr> <td>1</td> <td>Info missing in protocol</td> </tr> <tr> <td>2</td> <td>Info missing in result report</td> </tr> <tr> <td>3</td> <td>Info missing in both protocol &amp; result report</td> </tr> <tr> <td>4</td> <td>Same level of details &amp; matching</td> </tr> <tr> <td>5</td> <td>RR has more details &amp; matching</td> </tr> <tr> <td>6</td> <td>RR has fewer details &amp; matching</td> </tr> <tr> <td>7</td> <td>Mismatched details</td> </tr> </table> | 1 | Info missing in protocol        | 2 | Info missing in result report | 3  | Info missing in both protocol & result report | 4 | Same level of details & matching | 5 | RR has more details & matching | 6 | RR has fewer details & matching | 7 | Mismatched details |
| 1                                                                                                  | Info missing in protocol                                                                                                                                                                                                                                                                                                                                                                                                                                                                                     |   |                                 |   |                               |    |                                               |   |                                  |   |                                |   |                                 |   |                    |
| 2                                                                                                  | Info missing in result report                                                                                                                                                                                                                                                                                                                                                                                                                                                                                |   |                                 |   |                               |    |                                               |   |                                  |   |                                |   |                                 |   |                    |
| 3                                                                                                  | Info missing in both protocol & result report                                                                                                                                                                                                                                                                                                                                                                                                                                                                |   |                                 |   |                               |    |                                               |   |                                  |   |                                |   |                                 |   |                    |
| 4                                                                                                  | Same level of details & matching                                                                                                                                                                                                                                                                                                                                                                                                                                                                             |   |                                 |   |                               |    |                                               |   |                                  |   |                                |   |                                 |   |                    |
| 5                                                                                                  | RR has more details & matching                                                                                                                                                                                                                                                                                                                                                                                                                                                                               |   |                                 |   |                               |    |                                               |   |                                  |   |                                |   |                                 |   |                    |
| 6                                                                                                  | RR has fewer details & matching                                                                                                                                                                                                                                                                                                                                                                                                                                                                              |   |                                 |   |                               |    |                                               |   |                                  |   |                                |   |                                 |   |                    |
| 7                                                                                                  | Mismatched details                                                                                                                                                                                                                                                                                                                                                                                                                                                                                           |   |                                 |   |                               |    |                                               |   |                                  |   |                                |   |                                 |   |                    |

| Question                                                                                           | Options                                                                                                                                                                                                                                                                                                                                                                                                                                                                                                                                           |    |                          |   |                               |    |                                               |   |                                  |   |                                |   |                                 |   |                    |    |                      |
|----------------------------------------------------------------------------------------------------|---------------------------------------------------------------------------------------------------------------------------------------------------------------------------------------------------------------------------------------------------------------------------------------------------------------------------------------------------------------------------------------------------------------------------------------------------------------------------------------------------------------------------------------------------|----|--------------------------|---|-------------------------------|----|-----------------------------------------------|---|----------------------------------|---|--------------------------------|---|---------------------------------|---|--------------------|----|----------------------|
|                                                                                                    | <table border="1"> <tr> <td>99</td><td>Cannot be determined</td></tr> </table>                                                                                                                                                                                                                                                                                                                                                                                                                                                                    | 99 | Cannot be determined     |   |                               |    |                                               |   |                                  |   |                                |   |                                 |   |                    |    |                      |
| 99                                                                                                 | Cannot be determined                                                                                                                                                                                                                                                                                                                                                                                                                                                                                                                              |    |                          |   |                               |    |                                               |   |                                  |   |                                |   |                                 |   |                    |    |                      |
| Was the discrepancy important?                                                                     | multiple-choice <table border="1"> <tr> <td>1</td><td>Potentially important</td></tr> <tr> <td>0</td><td>Likely unimportant</td></tr> <tr> <td>99</td><td>Uncertain</td></tr> </table>                                                                                                                                                                                                                                                                                                                                                            | 1  | Potentially important    | 0 | Likely unimportant            | 99 | Uncertain                                     |   |                                  |   |                                |   |                                 |   |                    |    |                      |
| 1                                                                                                  | Potentially important                                                                                                                                                                                                                                                                                                                                                                                                                                                                                                                             |    |                          |   |                               |    |                                               |   |                                  |   |                                |   |                                 |   |                    |    |                      |
| 0                                                                                                  | Likely unimportant                                                                                                                                                                                                                                                                                                                                                                                                                                                                                                                                |    |                          |   |                               |    |                                               |   |                                  |   |                                |   |                                 |   |                    |    |                      |
| 99                                                                                                 | Uncertain                                                                                                                                                                                                                                                                                                                                                                                                                                                                                                                                         |    |                          |   |                               |    |                                               |   |                                  |   |                                |   |                                 |   |                    |    |                      |
| Explain why you think there is a discrepancy and whether this discrepancy is potentially important | text                                                                                                                                                                                                                                                                                                                                                                                                                                                                                                                                              |    |                          |   |                               |    |                                               |   |                                  |   |                                |   |                                 |   |                    |    |                      |
| Did the authors provide justification for the change/discrepancy?                                  | multiple-choice <table border="1"> <tr> <td>1</td><td>Yes</td></tr> <tr> <td>0</td><td>No</td></tr> <tr> <td>99</td><td>Justification not needed</td></tr> </table>                                                                                                                                                                                                                                                                                                                                                                               | 1  | Yes                      | 0 | No                            | 99 | Justification not needed                      |   |                                  |   |                                |   |                                 |   |                    |    |                      |
| 1                                                                                                  | Yes                                                                                                                                                                                                                                                                                                                                                                                                                                                                                                                                               |    |                          |   |                               |    |                                               |   |                                  |   |                                |   |                                 |   |                    |    |                      |
| 0                                                                                                  | No                                                                                                                                                                                                                                                                                                                                                                                                                                                                                                                                                |    |                          |   |                               |    |                                               |   |                                  |   |                                |   |                                 |   |                    |    |                      |
| 99                                                                                                 | Justification not needed                                                                                                                                                                                                                                                                                                                                                                                                                                                                                                                          |    |                          |   |                               |    |                                               |   |                                  |   |                                |   |                                 |   |                    |    |                      |
| What was the justification provided by authors?                                                    | text                                                                                                                                                                                                                                                                                                                                                                                                                                                                                                                                              |    |                          |   |                               |    |                                               |   |                                  |   |                                |   |                                 |   |                    |    |                      |
| Was there any discrepancy in the statistical method(s) used to analyse the ITS data?               | multiple-choice <table border="1"> <tr> <td>1</td><td>Info missing in protocol</td></tr> <tr> <td>2</td><td>Info missing in result report</td></tr> <tr> <td>3</td><td>Info missing in both protocol &amp; result report</td></tr> <tr> <td>4</td><td>Same level of details &amp; matching</td></tr> <tr> <td>5</td><td>RR has more details &amp; matching</td></tr> <tr> <td>6</td><td>RR has fewer details &amp; matching</td></tr> <tr> <td>7</td><td>Mismatched details</td></tr> <tr> <td>99</td><td>Cannot be determined</td></tr> </table> | 1  | Info missing in protocol | 2 | Info missing in result report | 3  | Info missing in both protocol & result report | 4 | Same level of details & matching | 5 | RR has more details & matching | 6 | RR has fewer details & matching | 7 | Mismatched details | 99 | Cannot be determined |
| 1                                                                                                  | Info missing in protocol                                                                                                                                                                                                                                                                                                                                                                                                                                                                                                                          |    |                          |   |                               |    |                                               |   |                                  |   |                                |   |                                 |   |                    |    |                      |
| 2                                                                                                  | Info missing in result report                                                                                                                                                                                                                                                                                                                                                                                                                                                                                                                     |    |                          |   |                               |    |                                               |   |                                  |   |                                |   |                                 |   |                    |    |                      |
| 3                                                                                                  | Info missing in both protocol & result report                                                                                                                                                                                                                                                                                                                                                                                                                                                                                                     |    |                          |   |                               |    |                                               |   |                                  |   |                                |   |                                 |   |                    |    |                      |
| 4                                                                                                  | Same level of details & matching                                                                                                                                                                                                                                                                                                                                                                                                                                                                                                                  |    |                          |   |                               |    |                                               |   |                                  |   |                                |   |                                 |   |                    |    |                      |
| 5                                                                                                  | RR has more details & matching                                                                                                                                                                                                                                                                                                                                                                                                                                                                                                                    |    |                          |   |                               |    |                                               |   |                                  |   |                                |   |                                 |   |                    |    |                      |
| 6                                                                                                  | RR has fewer details & matching                                                                                                                                                                                                                                                                                                                                                                                                                                                                                                                   |    |                          |   |                               |    |                                               |   |                                  |   |                                |   |                                 |   |                    |    |                      |
| 7                                                                                                  | Mismatched details                                                                                                                                                                                                                                                                                                                                                                                                                                                                                                                                |    |                          |   |                               |    |                                               |   |                                  |   |                                |   |                                 |   |                    |    |                      |
| 99                                                                                                 | Cannot be determined                                                                                                                                                                                                                                                                                                                                                                                                                                                                                                                              |    |                          |   |                               |    |                                               |   |                                  |   |                                |   |                                 |   |                    |    |                      |

| Question                                                                                                 | Options                                                                                                                                                                                                                                                                                                                                                                                                                                                                                                                                           |   |                          |   |                               |    |                                               |   |                                  |   |                                |   |                                 |   |                    |    |                      |
|----------------------------------------------------------------------------------------------------------|---------------------------------------------------------------------------------------------------------------------------------------------------------------------------------------------------------------------------------------------------------------------------------------------------------------------------------------------------------------------------------------------------------------------------------------------------------------------------------------------------------------------------------------------------|---|--------------------------|---|-------------------------------|----|-----------------------------------------------|---|----------------------------------|---|--------------------------------|---|---------------------------------|---|--------------------|----|----------------------|
| Was the discrepancy important?                                                                           | multiple-choice <table border="1"> <tr> <td>1</td><td>Potentially important</td></tr> <tr> <td>0</td><td>Likely unimportant</td></tr> <tr> <td>99</td><td>Uncertain</td></tr> </table>                                                                                                                                                                                                                                                                                                                                                            | 1 | Potentially important    | 0 | Likely unimportant            | 99 | Uncertain                                     |   |                                  |   |                                |   |                                 |   |                    |    |                      |
| 1                                                                                                        | Potentially important                                                                                                                                                                                                                                                                                                                                                                                                                                                                                                                             |   |                          |   |                               |    |                                               |   |                                  |   |                                |   |                                 |   |                    |    |                      |
| 0                                                                                                        | Likely unimportant                                                                                                                                                                                                                                                                                                                                                                                                                                                                                                                                |   |                          |   |                               |    |                                               |   |                                  |   |                                |   |                                 |   |                    |    |                      |
| 99                                                                                                       | Uncertain                                                                                                                                                                                                                                                                                                                                                                                                                                                                                                                                         |   |                          |   |                               |    |                                               |   |                                  |   |                                |   |                                 |   |                    |    |                      |
| Explain why you think there is a discrepancy and whether this discrepancy is potentially important       | text                                                                                                                                                                                                                                                                                                                                                                                                                                                                                                                                              |   |                          |   |                               |    |                                               |   |                                  |   |                                |   |                                 |   |                    |    |                      |
| Did the authors provide justification for the change/discrepancy?                                        | multiple-choice <table border="1"> <tr> <td>1</td><td>Yes</td></tr> <tr> <td>0</td><td>No</td></tr> <tr> <td>99</td><td>Justification not needed</td></tr> </table>                                                                                                                                                                                                                                                                                                                                                                               | 1 | Yes                      | 0 | No                            | 99 | Justification not needed                      |   |                                  |   |                                |   |                                 |   |                    |    |                      |
| 1                                                                                                        | Yes                                                                                                                                                                                                                                                                                                                                                                                                                                                                                                                                               |   |                          |   |                               |    |                                               |   |                                  |   |                                |   |                                 |   |                    |    |                      |
| 0                                                                                                        | No                                                                                                                                                                                                                                                                                                                                                                                                                                                                                                                                                |   |                          |   |                               |    |                                               |   |                                  |   |                                |   |                                 |   |                    |    |                      |
| 99                                                                                                       | Justification not needed                                                                                                                                                                                                                                                                                                                                                                                                                                                                                                                          |   |                          |   |                               |    |                                               |   |                                  |   |                                |   |                                 |   |                    |    |                      |
| What was the justification provided by authors?                                                          | text                                                                                                                                                                                                                                                                                                                                                                                                                                                                                                                                              |   |                          |   |                               |    |                                               |   |                                  |   |                                |   |                                 |   |                    |    |                      |
| Was there any discrepancy in how authors make decision about whether to adjust for autocorrelation (AC)? | multiple-choice <table border="1"> <tr> <td>1</td><td>Info missing in protocol</td></tr> <tr> <td>2</td><td>Info missing in result report</td></tr> <tr> <td>3</td><td>Info missing in both protocol &amp; result report</td></tr> <tr> <td>4</td><td>Same level of details &amp; matching</td></tr> <tr> <td>5</td><td>RR has more details &amp; matching</td></tr> <tr> <td>6</td><td>RR has fewer details &amp; matching</td></tr> <tr> <td>7</td><td>Mismatched details</td></tr> <tr> <td>99</td><td>Cannot be determined</td></tr> </table> | 1 | Info missing in protocol | 2 | Info missing in result report | 3  | Info missing in both protocol & result report | 4 | Same level of details & matching | 5 | RR has more details & matching | 6 | RR has fewer details & matching | 7 | Mismatched details | 99 | Cannot be determined |
| 1                                                                                                        | Info missing in protocol                                                                                                                                                                                                                                                                                                                                                                                                                                                                                                                          |   |                          |   |                               |    |                                               |   |                                  |   |                                |   |                                 |   |                    |    |                      |
| 2                                                                                                        | Info missing in result report                                                                                                                                                                                                                                                                                                                                                                                                                                                                                                                     |   |                          |   |                               |    |                                               |   |                                  |   |                                |   |                                 |   |                    |    |                      |
| 3                                                                                                        | Info missing in both protocol & result report                                                                                                                                                                                                                                                                                                                                                                                                                                                                                                     |   |                          |   |                               |    |                                               |   |                                  |   |                                |   |                                 |   |                    |    |                      |
| 4                                                                                                        | Same level of details & matching                                                                                                                                                                                                                                                                                                                                                                                                                                                                                                                  |   |                          |   |                               |    |                                               |   |                                  |   |                                |   |                                 |   |                    |    |                      |
| 5                                                                                                        | RR has more details & matching                                                                                                                                                                                                                                                                                                                                                                                                                                                                                                                    |   |                          |   |                               |    |                                               |   |                                  |   |                                |   |                                 |   |                    |    |                      |
| 6                                                                                                        | RR has fewer details & matching                                                                                                                                                                                                                                                                                                                                                                                                                                                                                                                   |   |                          |   |                               |    |                                               |   |                                  |   |                                |   |                                 |   |                    |    |                      |
| 7                                                                                                        | Mismatched details                                                                                                                                                                                                                                                                                                                                                                                                                                                                                                                                |   |                          |   |                               |    |                                               |   |                                  |   |                                |   |                                 |   |                    |    |                      |
| 99                                                                                                       | Cannot be determined                                                                                                                                                                                                                                                                                                                                                                                                                                                                                                                              |   |                          |   |                               |    |                                               |   |                                  |   |                                |   |                                 |   |                    |    |                      |
| Was the discrepancy important?                                                                           | multiple-choice <table border="1"> <tr> <td>1</td><td>Potentially important</td></tr> </table>                                                                                                                                                                                                                                                                                                                                                                                                                                                    | 1 | Potentially important    |   |                               |    |                                               |   |                                  |   |                                |   |                                 |   |                    |    |                      |
| 1                                                                                                        | Potentially important                                                                                                                                                                                                                                                                                                                                                                                                                                                                                                                             |   |                          |   |                               |    |                                               |   |                                  |   |                                |   |                                 |   |                    |    |                      |

| Question                                                                                           | Options                                                                                                                                                                                                                                                                                                                                                                                                                                                                                                                                                                                       |   |                       |    |                          |    |                               |   |                                               |   |                                  |   |                                |   |                                 |   |                    |    |                      |
|----------------------------------------------------------------------------------------------------|-----------------------------------------------------------------------------------------------------------------------------------------------------------------------------------------------------------------------------------------------------------------------------------------------------------------------------------------------------------------------------------------------------------------------------------------------------------------------------------------------------------------------------------------------------------------------------------------------|---|-----------------------|----|--------------------------|----|-------------------------------|---|-----------------------------------------------|---|----------------------------------|---|--------------------------------|---|---------------------------------|---|--------------------|----|----------------------|
|                                                                                                    | <table border="1"> <tr> <td>0</td><td>Likely unimportant</td></tr> <tr> <td>99</td><td>Uncertain</td></tr> </table>                                                                                                                                                                                                                                                                                                                                                                                                                                                                           | 0 | Likely unimportant    | 99 | Uncertain                |    |                               |   |                                               |   |                                  |   |                                |   |                                 |   |                    |    |                      |
| 0                                                                                                  | Likely unimportant                                                                                                                                                                                                                                                                                                                                                                                                                                                                                                                                                                            |   |                       |    |                          |    |                               |   |                                               |   |                                  |   |                                |   |                                 |   |                    |    |                      |
| 99                                                                                                 | Uncertain                                                                                                                                                                                                                                                                                                                                                                                                                                                                                                                                                                                     |   |                       |    |                          |    |                               |   |                                               |   |                                  |   |                                |   |                                 |   |                    |    |                      |
| Explain why you think there is a discrepancy and whether this discrepancy is potentially important | text                                                                                                                                                                                                                                                                                                                                                                                                                                                                                                                                                                                          |   |                       |    |                          |    |                               |   |                                               |   |                                  |   |                                |   |                                 |   |                    |    |                      |
| Did the authors provide justification for the change/discrepancy?                                  | multiple-choice <table border="1"> <tr> <td>1</td><td>Yes</td></tr> <tr> <td>0</td><td>No</td></tr> <tr> <td>99</td><td>Justification not needed</td></tr> </table>                                                                                                                                                                                                                                                                                                                                                                                                                           | 1 | Yes                   | 0  | No                       | 99 | Justification not needed      |   |                                               |   |                                  |   |                                |   |                                 |   |                    |    |                      |
| 1                                                                                                  | Yes                                                                                                                                                                                                                                                                                                                                                                                                                                                                                                                                                                                           |   |                       |    |                          |    |                               |   |                                               |   |                                  |   |                                |   |                                 |   |                    |    |                      |
| 0                                                                                                  | No                                                                                                                                                                                                                                                                                                                                                                                                                                                                                                                                                                                            |   |                       |    |                          |    |                               |   |                                               |   |                                  |   |                                |   |                                 |   |                    |    |                      |
| 99                                                                                                 | Justification not needed                                                                                                                                                                                                                                                                                                                                                                                                                                                                                                                                                                      |   |                       |    |                          |    |                               |   |                                               |   |                                  |   |                                |   |                                 |   |                    |    |                      |
| What was the justification provided by authors?                                                    | text                                                                                                                                                                                                                                                                                                                                                                                                                                                                                                                                                                                          |   |                       |    |                          |    |                               |   |                                               |   |                                  |   |                                |   |                                 |   |                    |    |                      |
| Was there any discrepancy in the approach to test for autocorrelation (AC)?                        | multiple-choice <table border="1"> <tr> <td>0</td><td>Not applicable</td></tr> <tr> <td>1</td><td>Info missing in protocol</td></tr> <tr> <td>2</td><td>Info missing in result report</td></tr> <tr> <td>3</td><td>Info missing in both protocol &amp; result report</td></tr> <tr> <td>4</td><td>Same level of details &amp; matching</td></tr> <tr> <td>5</td><td>RR has more details &amp; matching</td></tr> <tr> <td>6</td><td>RR has fewer details &amp; matching</td></tr> <tr> <td>7</td><td>Mismatched details</td></tr> <tr> <td>99</td><td>Cannot be determined</td></tr> </table> | 0 | Not applicable        | 1  | Info missing in protocol | 2  | Info missing in result report | 3 | Info missing in both protocol & result report | 4 | Same level of details & matching | 5 | RR has more details & matching | 6 | RR has fewer details & matching | 7 | Mismatched details | 99 | Cannot be determined |
| 0                                                                                                  | Not applicable                                                                                                                                                                                                                                                                                                                                                                                                                                                                                                                                                                                |   |                       |    |                          |    |                               |   |                                               |   |                                  |   |                                |   |                                 |   |                    |    |                      |
| 1                                                                                                  | Info missing in protocol                                                                                                                                                                                                                                                                                                                                                                                                                                                                                                                                                                      |   |                       |    |                          |    |                               |   |                                               |   |                                  |   |                                |   |                                 |   |                    |    |                      |
| 2                                                                                                  | Info missing in result report                                                                                                                                                                                                                                                                                                                                                                                                                                                                                                                                                                 |   |                       |    |                          |    |                               |   |                                               |   |                                  |   |                                |   |                                 |   |                    |    |                      |
| 3                                                                                                  | Info missing in both protocol & result report                                                                                                                                                                                                                                                                                                                                                                                                                                                                                                                                                 |   |                       |    |                          |    |                               |   |                                               |   |                                  |   |                                |   |                                 |   |                    |    |                      |
| 4                                                                                                  | Same level of details & matching                                                                                                                                                                                                                                                                                                                                                                                                                                                                                                                                                              |   |                       |    |                          |    |                               |   |                                               |   |                                  |   |                                |   |                                 |   |                    |    |                      |
| 5                                                                                                  | RR has more details & matching                                                                                                                                                                                                                                                                                                                                                                                                                                                                                                                                                                |   |                       |    |                          |    |                               |   |                                               |   |                                  |   |                                |   |                                 |   |                    |    |                      |
| 6                                                                                                  | RR has fewer details & matching                                                                                                                                                                                                                                                                                                                                                                                                                                                                                                                                                               |   |                       |    |                          |    |                               |   |                                               |   |                                  |   |                                |   |                                 |   |                    |    |                      |
| 7                                                                                                  | Mismatched details                                                                                                                                                                                                                                                                                                                                                                                                                                                                                                                                                                            |   |                       |    |                          |    |                               |   |                                               |   |                                  |   |                                |   |                                 |   |                    |    |                      |
| 99                                                                                                 | Cannot be determined                                                                                                                                                                                                                                                                                                                                                                                                                                                                                                                                                                          |   |                       |    |                          |    |                               |   |                                               |   |                                  |   |                                |   |                                 |   |                    |    |                      |
| Was the discrepancy important?                                                                     | multiple-choice <table border="1"> <tr> <td>1</td><td>Potentially important</td></tr> <tr> <td>0</td><td>Likely unimportant</td></tr> </table>                                                                                                                                                                                                                                                                                                                                                                                                                                                | 1 | Potentially important | 0  | Likely unimportant       |    |                               |   |                                               |   |                                  |   |                                |   |                                 |   |                    |    |                      |
| 1                                                                                                  | Potentially important                                                                                                                                                                                                                                                                                                                                                                                                                                                                                                                                                                         |   |                       |    |                          |    |                               |   |                                               |   |                                  |   |                                |   |                                 |   |                    |    |                      |
| 0                                                                                                  | Likely unimportant                                                                                                                                                                                                                                                                                                                                                                                                                                                                                                                                                                            |   |                       |    |                          |    |                               |   |                                               |   |                                  |   |                                |   |                                 |   |                    |    |                      |

| Question                                                                                           | Options                                                                                                                                                                                                                                                                                                                                                                                                                                                                                                                                           |    |                          |   |                               |    |                                               |   |                                  |   |                                |   |                                 |   |                    |    |                      |
|----------------------------------------------------------------------------------------------------|---------------------------------------------------------------------------------------------------------------------------------------------------------------------------------------------------------------------------------------------------------------------------------------------------------------------------------------------------------------------------------------------------------------------------------------------------------------------------------------------------------------------------------------------------|----|--------------------------|---|-------------------------------|----|-----------------------------------------------|---|----------------------------------|---|--------------------------------|---|---------------------------------|---|--------------------|----|----------------------|
|                                                                                                    | <table border="1"> <tr> <td>99</td><td>Uncertain</td></tr> </table>                                                                                                                                                                                                                                                                                                                                                                                                                                                                               | 99 | Uncertain                |   |                               |    |                                               |   |                                  |   |                                |   |                                 |   |                    |    |                      |
| 99                                                                                                 | Uncertain                                                                                                                                                                                                                                                                                                                                                                                                                                                                                                                                         |    |                          |   |                               |    |                                               |   |                                  |   |                                |   |                                 |   |                    |    |                      |
| Explain why you think there is a discrepancy and whether this discrepancy is potentially important | text                                                                                                                                                                                                                                                                                                                                                                                                                                                                                                                                              |    |                          |   |                               |    |                                               |   |                                  |   |                                |   |                                 |   |                    |    |                      |
| Did the authors provide justification for the change/discrepancy?                                  | multiple-choice <table border="1"> <tr> <td>1</td><td>Yes</td></tr> <tr> <td>0</td><td>No</td></tr> <tr> <td>99</td><td>Justification not needed</td></tr> </table>                                                                                                                                                                                                                                                                                                                                                                               | 1  | Yes                      | 0 | No                            | 99 | Justification not needed                      |   |                                  |   |                                |   |                                 |   |                    |    |                      |
| 1                                                                                                  | Yes                                                                                                                                                                                                                                                                                                                                                                                                                                                                                                                                               |    |                          |   |                               |    |                                               |   |                                  |   |                                |   |                                 |   |                    |    |                      |
| 0                                                                                                  | No                                                                                                                                                                                                                                                                                                                                                                                                                                                                                                                                                |    |                          |   |                               |    |                                               |   |                                  |   |                                |   |                                 |   |                    |    |                      |
| 99                                                                                                 | Justification not needed                                                                                                                                                                                                                                                                                                                                                                                                                                                                                                                          |    |                          |   |                               |    |                                               |   |                                  |   |                                |   |                                 |   |                    |    |                      |
| What was the justification provided by authors?                                                    | text                                                                                                                                                                                                                                                                                                                                                                                                                                                                                                                                              |    |                          |   |                               |    |                                               |   |                                  |   |                                |   |                                 |   |                    |    |                      |
| Was there any discrepancy in the method(s) to adjust for autocorrelation (AC)?                     | multiple-choice <table border="1"> <tr> <td>1</td><td>Info missing in protocol</td></tr> <tr> <td>2</td><td>Info missing in result report</td></tr> <tr> <td>3</td><td>Info missing in both protocol &amp; result report</td></tr> <tr> <td>4</td><td>Same level of details &amp; matching</td></tr> <tr> <td>5</td><td>RR has more details &amp; matching</td></tr> <tr> <td>6</td><td>RR has fewer details &amp; matching</td></tr> <tr> <td>7</td><td>Mismatched details</td></tr> <tr> <td>99</td><td>Cannot be determined</td></tr> </table> | 1  | Info missing in protocol | 2 | Info missing in result report | 3  | Info missing in both protocol & result report | 4 | Same level of details & matching | 5 | RR has more details & matching | 6 | RR has fewer details & matching | 7 | Mismatched details | 99 | Cannot be determined |
| 1                                                                                                  | Info missing in protocol                                                                                                                                                                                                                                                                                                                                                                                                                                                                                                                          |    |                          |   |                               |    |                                               |   |                                  |   |                                |   |                                 |   |                    |    |                      |
| 2                                                                                                  | Info missing in result report                                                                                                                                                                                                                                                                                                                                                                                                                                                                                                                     |    |                          |   |                               |    |                                               |   |                                  |   |                                |   |                                 |   |                    |    |                      |
| 3                                                                                                  | Info missing in both protocol & result report                                                                                                                                                                                                                                                                                                                                                                                                                                                                                                     |    |                          |   |                               |    |                                               |   |                                  |   |                                |   |                                 |   |                    |    |                      |
| 4                                                                                                  | Same level of details & matching                                                                                                                                                                                                                                                                                                                                                                                                                                                                                                                  |    |                          |   |                               |    |                                               |   |                                  |   |                                |   |                                 |   |                    |    |                      |
| 5                                                                                                  | RR has more details & matching                                                                                                                                                                                                                                                                                                                                                                                                                                                                                                                    |    |                          |   |                               |    |                                               |   |                                  |   |                                |   |                                 |   |                    |    |                      |
| 6                                                                                                  | RR has fewer details & matching                                                                                                                                                                                                                                                                                                                                                                                                                                                                                                                   |    |                          |   |                               |    |                                               |   |                                  |   |                                |   |                                 |   |                    |    |                      |
| 7                                                                                                  | Mismatched details                                                                                                                                                                                                                                                                                                                                                                                                                                                                                                                                |    |                          |   |                               |    |                                               |   |                                  |   |                                |   |                                 |   |                    |    |                      |
| 99                                                                                                 | Cannot be determined                                                                                                                                                                                                                                                                                                                                                                                                                                                                                                                              |    |                          |   |                               |    |                                               |   |                                  |   |                                |   |                                 |   |                    |    |                      |
| Was the discrepancy important?                                                                     | multiple-choice <table border="1"> <tr> <td>1</td><td>Potentially important</td></tr> <tr> <td>0</td><td>Likely unimportant</td></tr> <tr> <td>99</td><td>Uncertain</td></tr> </table>                                                                                                                                                                                                                                                                                                                                                            | 1  | Potentially important    | 0 | Likely unimportant            | 99 | Uncertain                                     |   |                                  |   |                                |   |                                 |   |                    |    |                      |
| 1                                                                                                  | Potentially important                                                                                                                                                                                                                                                                                                                                                                                                                                                                                                                             |    |                          |   |                               |    |                                               |   |                                  |   |                                |   |                                 |   |                    |    |                      |
| 0                                                                                                  | Likely unimportant                                                                                                                                                                                                                                                                                                                                                                                                                                                                                                                                |    |                          |   |                               |    |                                               |   |                                  |   |                                |   |                                 |   |                    |    |                      |
| 99                                                                                                 | Uncertain                                                                                                                                                                                                                                                                                                                                                                                                                                                                                                                                         |    |                          |   |                               |    |                                               |   |                                  |   |                                |   |                                 |   |                    |    |                      |

| Question                                                                                           | Options                                                                                                                                                                                                                                                                                                                                                                                                                                                                                                                                           |   |                          |   |                               |    |                                               |   |                                  |   |                                |   |                                 |   |                    |    |                      |
|----------------------------------------------------------------------------------------------------|---------------------------------------------------------------------------------------------------------------------------------------------------------------------------------------------------------------------------------------------------------------------------------------------------------------------------------------------------------------------------------------------------------------------------------------------------------------------------------------------------------------------------------------------------|---|--------------------------|---|-------------------------------|----|-----------------------------------------------|---|----------------------------------|---|--------------------------------|---|---------------------------------|---|--------------------|----|----------------------|
| Explain why you think there is a discrepancy and whether this discrepancy is potentially important | text                                                                                                                                                                                                                                                                                                                                                                                                                                                                                                                                              |   |                          |   |                               |    |                                               |   |                                  |   |                                |   |                                 |   |                    |    |                      |
| Did the authors provide justification for the change/discrepancy?                                  | multiple-choice <table border="1"> <tr> <td>1</td><td>Yes</td></tr> <tr> <td>0</td><td>No</td></tr> <tr> <td>99</td><td>Justification not needed</td></tr> </table>                                                                                                                                                                                                                                                                                                                                                                               | 1 | Yes                      | 0 | No                            | 99 | Justification not needed                      |   |                                  |   |                                |   |                                 |   |                    |    |                      |
| 1                                                                                                  | Yes                                                                                                                                                                                                                                                                                                                                                                                                                                                                                                                                               |   |                          |   |                               |    |                                               |   |                                  |   |                                |   |                                 |   |                    |    |                      |
| 0                                                                                                  | No                                                                                                                                                                                                                                                                                                                                                                                                                                                                                                                                                |   |                          |   |                               |    |                                               |   |                                  |   |                                |   |                                 |   |                    |    |                      |
| 99                                                                                                 | Justification not needed                                                                                                                                                                                                                                                                                                                                                                                                                                                                                                                          |   |                          |   |                               |    |                                               |   |                                  |   |                                |   |                                 |   |                    |    |                      |
| What was the justification provided by authors?                                                    | text                                                                                                                                                                                                                                                                                                                                                                                                                                                                                                                                              |   |                          |   |                               |    |                                               |   |                                  |   |                                |   |                                 |   |                    |    |                      |
| Was there any discrepancy in the method(s) to detect and/or adjust for seasonality?                | multiple-choice <table border="1"> <tr> <td>1</td><td>Info missing in protocol</td></tr> <tr> <td>2</td><td>Info missing in result report</td></tr> <tr> <td>3</td><td>Info missing in both protocol &amp; result report</td></tr> <tr> <td>4</td><td>Same level of details &amp; matching</td></tr> <tr> <td>5</td><td>RR has more details &amp; matching</td></tr> <tr> <td>6</td><td>RR has fewer details &amp; matching</td></tr> <tr> <td>7</td><td>Mismatched details</td></tr> <tr> <td>99</td><td>Cannot be determined</td></tr> </table> | 1 | Info missing in protocol | 2 | Info missing in result report | 3  | Info missing in both protocol & result report | 4 | Same level of details & matching | 5 | RR has more details & matching | 6 | RR has fewer details & matching | 7 | Mismatched details | 99 | Cannot be determined |
| 1                                                                                                  | Info missing in protocol                                                                                                                                                                                                                                                                                                                                                                                                                                                                                                                          |   |                          |   |                               |    |                                               |   |                                  |   |                                |   |                                 |   |                    |    |                      |
| 2                                                                                                  | Info missing in result report                                                                                                                                                                                                                                                                                                                                                                                                                                                                                                                     |   |                          |   |                               |    |                                               |   |                                  |   |                                |   |                                 |   |                    |    |                      |
| 3                                                                                                  | Info missing in both protocol & result report                                                                                                                                                                                                                                                                                                                                                                                                                                                                                                     |   |                          |   |                               |    |                                               |   |                                  |   |                                |   |                                 |   |                    |    |                      |
| 4                                                                                                  | Same level of details & matching                                                                                                                                                                                                                                                                                                                                                                                                                                                                                                                  |   |                          |   |                               |    |                                               |   |                                  |   |                                |   |                                 |   |                    |    |                      |
| 5                                                                                                  | RR has more details & matching                                                                                                                                                                                                                                                                                                                                                                                                                                                                                                                    |   |                          |   |                               |    |                                               |   |                                  |   |                                |   |                                 |   |                    |    |                      |
| 6                                                                                                  | RR has fewer details & matching                                                                                                                                                                                                                                                                                                                                                                                                                                                                                                                   |   |                          |   |                               |    |                                               |   |                                  |   |                                |   |                                 |   |                    |    |                      |
| 7                                                                                                  | Mismatched details                                                                                                                                                                                                                                                                                                                                                                                                                                                                                                                                |   |                          |   |                               |    |                                               |   |                                  |   |                                |   |                                 |   |                    |    |                      |
| 99                                                                                                 | Cannot be determined                                                                                                                                                                                                                                                                                                                                                                                                                                                                                                                              |   |                          |   |                               |    |                                               |   |                                  |   |                                |   |                                 |   |                    |    |                      |
| Was the discrepancy important?                                                                     | multiple-choice <table border="1"> <tr> <td>1</td><td>Potentially important</td></tr> <tr> <td>0</td><td>Likely unimportant</td></tr> <tr> <td>99</td><td>Uncertain</td></tr> </table>                                                                                                                                                                                                                                                                                                                                                            | 1 | Potentially important    | 0 | Likely unimportant            | 99 | Uncertain                                     |   |                                  |   |                                |   |                                 |   |                    |    |                      |
| 1                                                                                                  | Potentially important                                                                                                                                                                                                                                                                                                                                                                                                                                                                                                                             |   |                          |   |                               |    |                                               |   |                                  |   |                                |   |                                 |   |                    |    |                      |
| 0                                                                                                  | Likely unimportant                                                                                                                                                                                                                                                                                                                                                                                                                                                                                                                                |   |                          |   |                               |    |                                               |   |                                  |   |                                |   |                                 |   |                    |    |                      |
| 99                                                                                                 | Uncertain                                                                                                                                                                                                                                                                                                                                                                                                                                                                                                                                         |   |                          |   |                               |    |                                               |   |                                  |   |                                |   |                                 |   |                    |    |                      |
| Explain why you think there is a discrepancy and whether this discrepancy is potentially important | text                                                                                                                                                                                                                                                                                                                                                                                                                                                                                                                                              |   |                          |   |                               |    |                                               |   |                                  |   |                                |   |                                 |   |                    |    |                      |

| Question                                                                                           | Options                                                                                                                                                                                                                                                                                                                                                                                                                                                                                                                                           |   |                          |   |                               |    |                                               |   |                                  |   |                                |   |                                 |   |                    |    |                      |
|----------------------------------------------------------------------------------------------------|---------------------------------------------------------------------------------------------------------------------------------------------------------------------------------------------------------------------------------------------------------------------------------------------------------------------------------------------------------------------------------------------------------------------------------------------------------------------------------------------------------------------------------------------------|---|--------------------------|---|-------------------------------|----|-----------------------------------------------|---|----------------------------------|---|--------------------------------|---|---------------------------------|---|--------------------|----|----------------------|
| Did the authors provide justification for the change/discrepancy?                                  | multiple-choice <table border="1"> <tr> <td>1</td><td>Yes</td></tr> <tr> <td>0</td><td>No</td></tr> <tr> <td>99</td><td>Justification not needed</td></tr> </table>                                                                                                                                                                                                                                                                                                                                                                               | 1 | Yes                      | 0 | No                            | 99 | Justification not needed                      |   |                                  |   |                                |   |                                 |   |                    |    |                      |
| 1                                                                                                  | Yes                                                                                                                                                                                                                                                                                                                                                                                                                                                                                                                                               |   |                          |   |                               |    |                                               |   |                                  |   |                                |   |                                 |   |                    |    |                      |
| 0                                                                                                  | No                                                                                                                                                                                                                                                                                                                                                                                                                                                                                                                                                |   |                          |   |                               |    |                                               |   |                                  |   |                                |   |                                 |   |                    |    |                      |
| 99                                                                                                 | Justification not needed                                                                                                                                                                                                                                                                                                                                                                                                                                                                                                                          |   |                          |   |                               |    |                                               |   |                                  |   |                                |   |                                 |   |                    |    |                      |
| What was the justification provided by authors?                                                    | text                                                                                                                                                                                                                                                                                                                                                                                                                                                                                                                                              |   |                          |   |                               |    |                                               |   |                                  |   |                                |   |                                 |   |                    |    |                      |
| Was there any discrepancy in the method(s) to test and/or adjust non-stationarity?                 | multiple-choice <table border="1"> <tr> <td>1</td><td>Info missing in protocol</td></tr> <tr> <td>2</td><td>Info missing in result report</td></tr> <tr> <td>3</td><td>Info missing in both protocol &amp; result report</td></tr> <tr> <td>4</td><td>Same level of details &amp; matching</td></tr> <tr> <td>5</td><td>RR has more details &amp; matching</td></tr> <tr> <td>6</td><td>RR has fewer details &amp; matching</td></tr> <tr> <td>7</td><td>Mismatched details</td></tr> <tr> <td>99</td><td>Cannot be determined</td></tr> </table> | 1 | Info missing in protocol | 2 | Info missing in result report | 3  | Info missing in both protocol & result report | 4 | Same level of details & matching | 5 | RR has more details & matching | 6 | RR has fewer details & matching | 7 | Mismatched details | 99 | Cannot be determined |
| 1                                                                                                  | Info missing in protocol                                                                                                                                                                                                                                                                                                                                                                                                                                                                                                                          |   |                          |   |                               |    |                                               |   |                                  |   |                                |   |                                 |   |                    |    |                      |
| 2                                                                                                  | Info missing in result report                                                                                                                                                                                                                                                                                                                                                                                                                                                                                                                     |   |                          |   |                               |    |                                               |   |                                  |   |                                |   |                                 |   |                    |    |                      |
| 3                                                                                                  | Info missing in both protocol & result report                                                                                                                                                                                                                                                                                                                                                                                                                                                                                                     |   |                          |   |                               |    |                                               |   |                                  |   |                                |   |                                 |   |                    |    |                      |
| 4                                                                                                  | Same level of details & matching                                                                                                                                                                                                                                                                                                                                                                                                                                                                                                                  |   |                          |   |                               |    |                                               |   |                                  |   |                                |   |                                 |   |                    |    |                      |
| 5                                                                                                  | RR has more details & matching                                                                                                                                                                                                                                                                                                                                                                                                                                                                                                                    |   |                          |   |                               |    |                                               |   |                                  |   |                                |   |                                 |   |                    |    |                      |
| 6                                                                                                  | RR has fewer details & matching                                                                                                                                                                                                                                                                                                                                                                                                                                                                                                                   |   |                          |   |                               |    |                                               |   |                                  |   |                                |   |                                 |   |                    |    |                      |
| 7                                                                                                  | Mismatched details                                                                                                                                                                                                                                                                                                                                                                                                                                                                                                                                |   |                          |   |                               |    |                                               |   |                                  |   |                                |   |                                 |   |                    |    |                      |
| 99                                                                                                 | Cannot be determined                                                                                                                                                                                                                                                                                                                                                                                                                                                                                                                              |   |                          |   |                               |    |                                               |   |                                  |   |                                |   |                                 |   |                    |    |                      |
| Was the discrepancy important?                                                                     | multiple-choice <table border="1"> <tr> <td>1</td><td>Potentially important</td></tr> <tr> <td>0</td><td>Likely unimportant</td></tr> <tr> <td>99</td><td>Uncertain</td></tr> </table>                                                                                                                                                                                                                                                                                                                                                            | 1 | Potentially important    | 0 | Likely unimportant            | 99 | Uncertain                                     |   |                                  |   |                                |   |                                 |   |                    |    |                      |
| 1                                                                                                  | Potentially important                                                                                                                                                                                                                                                                                                                                                                                                                                                                                                                             |   |                          |   |                               |    |                                               |   |                                  |   |                                |   |                                 |   |                    |    |                      |
| 0                                                                                                  | Likely unimportant                                                                                                                                                                                                                                                                                                                                                                                                                                                                                                                                |   |                          |   |                               |    |                                               |   |                                  |   |                                |   |                                 |   |                    |    |                      |
| 99                                                                                                 | Uncertain                                                                                                                                                                                                                                                                                                                                                                                                                                                                                                                                         |   |                          |   |                               |    |                                               |   |                                  |   |                                |   |                                 |   |                    |    |                      |
| Explain why you think there is a discrepancy and whether this discrepancy is potentially important | text                                                                                                                                                                                                                                                                                                                                                                                                                                                                                                                                              |   |                          |   |                               |    |                                               |   |                                  |   |                                |   |                                 |   |                    |    |                      |
| Did the authors provide justification for the change/discrepancy?                                  | multiple-choice <table border="1"> <tr> <td>1</td><td>Yes</td></tr> </table>                                                                                                                                                                                                                                                                                                                                                                                                                                                                      | 1 | Yes                      |   |                               |    |                                               |   |                                  |   |                                |   |                                 |   |                    |    |                      |
| 1                                                                                                  | Yes                                                                                                                                                                                                                                                                                                                                                                                                                                                                                                                                               |   |                          |   |                               |    |                                               |   |                                  |   |                                |   |                                 |   |                    |    |                      |



| Question                                                                                           | Options                                                                                                                                                                                                                                                                                                                                                                                                                                                                                                                                           |   |                          |    |                               |    |                                               |   |                                  |   |                                |   |                                 |   |                    |    |                      |
|----------------------------------------------------------------------------------------------------|---------------------------------------------------------------------------------------------------------------------------------------------------------------------------------------------------------------------------------------------------------------------------------------------------------------------------------------------------------------------------------------------------------------------------------------------------------------------------------------------------------------------------------------------------|---|--------------------------|----|-------------------------------|----|-----------------------------------------------|---|----------------------------------|---|--------------------------------|---|---------------------------------|---|--------------------|----|----------------------|
|                                                                                                    | <table border="1"> <tr> <td>0</td><td>No</td></tr> <tr> <td>99</td><td>Justification not needed</td></tr> </table>                                                                                                                                                                                                                                                                                                                                                                                                                                | 0 | No                       | 99 | Justification not needed      |    |                                               |   |                                  |   |                                |   |                                 |   |                    |    |                      |
| 0                                                                                                  | No                                                                                                                                                                                                                                                                                                                                                                                                                                                                                                                                                |   |                          |    |                               |    |                                               |   |                                  |   |                                |   |                                 |   |                    |    |                      |
| 99                                                                                                 | Justification not needed                                                                                                                                                                                                                                                                                                                                                                                                                                                                                                                          |   |                          |    |                               |    |                                               |   |                                  |   |                                |   |                                 |   |                    |    |                      |
| What was the justification provided by authors?                                                    | text                                                                                                                                                                                                                                                                                                                                                                                                                                                                                                                                              |   |                          |    |                               |    |                                               |   |                                  |   |                                |   |                                 |   |                    |    |                      |
| Was there any discrepancy in the presence and the type of control series?                          | multiple-choice <table border="1"> <tr> <td>1</td><td>Info missing in protocol</td></tr> <tr> <td>2</td><td>Info missing in result report</td></tr> <tr> <td>3</td><td>Info missing in both protocol &amp; result report</td></tr> <tr> <td>4</td><td>Same level of details &amp; matching</td></tr> <tr> <td>5</td><td>RR has more details &amp; matching</td></tr> <tr> <td>6</td><td>RR has fewer details &amp; matching</td></tr> <tr> <td>7</td><td>Mismatched details</td></tr> <tr> <td>99</td><td>Cannot be determined</td></tr> </table> | 1 | Info missing in protocol | 2  | Info missing in result report | 3  | Info missing in both protocol & result report | 4 | Same level of details & matching | 5 | RR has more details & matching | 6 | RR has fewer details & matching | 7 | Mismatched details | 99 | Cannot be determined |
| 1                                                                                                  | Info missing in protocol                                                                                                                                                                                                                                                                                                                                                                                                                                                                                                                          |   |                          |    |                               |    |                                               |   |                                  |   |                                |   |                                 |   |                    |    |                      |
| 2                                                                                                  | Info missing in result report                                                                                                                                                                                                                                                                                                                                                                                                                                                                                                                     |   |                          |    |                               |    |                                               |   |                                  |   |                                |   |                                 |   |                    |    |                      |
| 3                                                                                                  | Info missing in both protocol & result report                                                                                                                                                                                                                                                                                                                                                                                                                                                                                                     |   |                          |    |                               |    |                                               |   |                                  |   |                                |   |                                 |   |                    |    |                      |
| 4                                                                                                  | Same level of details & matching                                                                                                                                                                                                                                                                                                                                                                                                                                                                                                                  |   |                          |    |                               |    |                                               |   |                                  |   |                                |   |                                 |   |                    |    |                      |
| 5                                                                                                  | RR has more details & matching                                                                                                                                                                                                                                                                                                                                                                                                                                                                                                                    |   |                          |    |                               |    |                                               |   |                                  |   |                                |   |                                 |   |                    |    |                      |
| 6                                                                                                  | RR has fewer details & matching                                                                                                                                                                                                                                                                                                                                                                                                                                                                                                                   |   |                          |    |                               |    |                                               |   |                                  |   |                                |   |                                 |   |                    |    |                      |
| 7                                                                                                  | Mismatched details                                                                                                                                                                                                                                                                                                                                                                                                                                                                                                                                |   |                          |    |                               |    |                                               |   |                                  |   |                                |   |                                 |   |                    |    |                      |
| 99                                                                                                 | Cannot be determined                                                                                                                                                                                                                                                                                                                                                                                                                                                                                                                              |   |                          |    |                               |    |                                               |   |                                  |   |                                |   |                                 |   |                    |    |                      |
| Was the discrepancy important?                                                                     | multiple-choice <table border="1"> <tr> <td>1</td><td>Potentially important</td></tr> <tr> <td>0</td><td>Likely unimportant</td></tr> <tr> <td>99</td><td>Uncertain</td></tr> </table>                                                                                                                                                                                                                                                                                                                                                            | 1 | Potentially important    | 0  | Likely unimportant            | 99 | Uncertain                                     |   |                                  |   |                                |   |                                 |   |                    |    |                      |
| 1                                                                                                  | Potentially important                                                                                                                                                                                                                                                                                                                                                                                                                                                                                                                             |   |                          |    |                               |    |                                               |   |                                  |   |                                |   |                                 |   |                    |    |                      |
| 0                                                                                                  | Likely unimportant                                                                                                                                                                                                                                                                                                                                                                                                                                                                                                                                |   |                          |    |                               |    |                                               |   |                                  |   |                                |   |                                 |   |                    |    |                      |
| 99                                                                                                 | Uncertain                                                                                                                                                                                                                                                                                                                                                                                                                                                                                                                                         |   |                          |    |                               |    |                                               |   |                                  |   |                                |   |                                 |   |                    |    |                      |
| Explain why you think there is a discrepancy and whether this discrepancy is potentially important | text                                                                                                                                                                                                                                                                                                                                                                                                                                                                                                                                              |   |                          |    |                               |    |                                               |   |                                  |   |                                |   |                                 |   |                    |    |                      |
| Did the authors provide justification for the change/discrepancy?                                  | multiple-choice <table border="1"> <tr> <td>1</td><td>Yes</td></tr> <tr> <td>0</td><td>No</td></tr> <tr> <td>99</td><td>Justification not needed</td></tr> </table>                                                                                                                                                                                                                                                                                                                                                                               | 1 | Yes                      | 0  | No                            | 99 | Justification not needed                      |   |                                  |   |                                |   |                                 |   |                    |    |                      |
| 1                                                                                                  | Yes                                                                                                                                                                                                                                                                                                                                                                                                                                                                                                                                               |   |                          |    |                               |    |                                               |   |                                  |   |                                |   |                                 |   |                    |    |                      |
| 0                                                                                                  | No                                                                                                                                                                                                                                                                                                                                                                                                                                                                                                                                                |   |                          |    |                               |    |                                               |   |                                  |   |                                |   |                                 |   |                    |    |                      |
| 99                                                                                                 | Justification not needed                                                                                                                                                                                                                                                                                                                                                                                                                                                                                                                          |   |                          |    |                               |    |                                               |   |                                  |   |                                |   |                                 |   |                    |    |                      |

| Question                                                                                           | Options                                                                                                                                                                                                                                                                                                                                                                                                                                                                                                                                                                                         |   |                       |   |                          |    |                               |   |                                               |   |                                  |   |                                |   |                                 |   |                    |    |                      |
|----------------------------------------------------------------------------------------------------|-------------------------------------------------------------------------------------------------------------------------------------------------------------------------------------------------------------------------------------------------------------------------------------------------------------------------------------------------------------------------------------------------------------------------------------------------------------------------------------------------------------------------------------------------------------------------------------------------|---|-----------------------|---|--------------------------|----|-------------------------------|---|-----------------------------------------------|---|----------------------------------|---|--------------------------------|---|---------------------------------|---|--------------------|----|----------------------|
| What was the justification provided by authors?                                                    | text                                                                                                                                                                                                                                                                                                                                                                                                                                                                                                                                                                                            |   |                       |   |                          |    |                               |   |                                               |   |                                  |   |                                |   |                                 |   |                    |    |                      |
| Was there any discrepancy in how the intervention series was compared to the control series?       | <div>multiple-choice</div> <table border="1"> <tr><td>0</td><td>Not applicable</td></tr> <tr><td>1</td><td>Info missing in protocol</td></tr> <tr><td>2</td><td>Info missing in result report</td></tr> <tr><td>3</td><td>Info missing in both protocol &amp; result report</td></tr> <tr><td>4</td><td>Same level of details &amp; matching</td></tr> <tr><td>5</td><td>RR has more details &amp; matching</td></tr> <tr><td>6</td><td>RR has fewer details &amp; matching</td></tr> <tr><td>7</td><td>Mismatched details</td></tr> <tr><td>99</td><td>Cannot be determined</td></tr> </table> | 0 | Not applicable        | 1 | Info missing in protocol | 2  | Info missing in result report | 3 | Info missing in both protocol & result report | 4 | Same level of details & matching | 5 | RR has more details & matching | 6 | RR has fewer details & matching | 7 | Mismatched details | 99 | Cannot be determined |
| 0                                                                                                  | Not applicable                                                                                                                                                                                                                                                                                                                                                                                                                                                                                                                                                                                  |   |                       |   |                          |    |                               |   |                                               |   |                                  |   |                                |   |                                 |   |                    |    |                      |
| 1                                                                                                  | Info missing in protocol                                                                                                                                                                                                                                                                                                                                                                                                                                                                                                                                                                        |   |                       |   |                          |    |                               |   |                                               |   |                                  |   |                                |   |                                 |   |                    |    |                      |
| 2                                                                                                  | Info missing in result report                                                                                                                                                                                                                                                                                                                                                                                                                                                                                                                                                                   |   |                       |   |                          |    |                               |   |                                               |   |                                  |   |                                |   |                                 |   |                    |    |                      |
| 3                                                                                                  | Info missing in both protocol & result report                                                                                                                                                                                                                                                                                                                                                                                                                                                                                                                                                   |   |                       |   |                          |    |                               |   |                                               |   |                                  |   |                                |   |                                 |   |                    |    |                      |
| 4                                                                                                  | Same level of details & matching                                                                                                                                                                                                                                                                                                                                                                                                                                                                                                                                                                |   |                       |   |                          |    |                               |   |                                               |   |                                  |   |                                |   |                                 |   |                    |    |                      |
| 5                                                                                                  | RR has more details & matching                                                                                                                                                                                                                                                                                                                                                                                                                                                                                                                                                                  |   |                       |   |                          |    |                               |   |                                               |   |                                  |   |                                |   |                                 |   |                    |    |                      |
| 6                                                                                                  | RR has fewer details & matching                                                                                                                                                                                                                                                                                                                                                                                                                                                                                                                                                                 |   |                       |   |                          |    |                               |   |                                               |   |                                  |   |                                |   |                                 |   |                    |    |                      |
| 7                                                                                                  | Mismatched details                                                                                                                                                                                                                                                                                                                                                                                                                                                                                                                                                                              |   |                       |   |                          |    |                               |   |                                               |   |                                  |   |                                |   |                                 |   |                    |    |                      |
| 99                                                                                                 | Cannot be determined                                                                                                                                                                                                                                                                                                                                                                                                                                                                                                                                                                            |   |                       |   |                          |    |                               |   |                                               |   |                                  |   |                                |   |                                 |   |                    |    |                      |
| Was the discrepancy important?                                                                     | <div>multiple-choice</div> <table border="1"> <tr><td>1</td><td>Potentially important</td></tr> <tr><td>0</td><td>Likely unimportant</td></tr> <tr><td>99</td><td>Uncertain</td></tr> </table>                                                                                                                                                                                                                                                                                                                                                                                                  | 1 | Potentially important | 0 | Likely unimportant       | 99 | Uncertain                     |   |                                               |   |                                  |   |                                |   |                                 |   |                    |    |                      |
| 1                                                                                                  | Potentially important                                                                                                                                                                                                                                                                                                                                                                                                                                                                                                                                                                           |   |                       |   |                          |    |                               |   |                                               |   |                                  |   |                                |   |                                 |   |                    |    |                      |
| 0                                                                                                  | Likely unimportant                                                                                                                                                                                                                                                                                                                                                                                                                                                                                                                                                                              |   |                       |   |                          |    |                               |   |                                               |   |                                  |   |                                |   |                                 |   |                    |    |                      |
| 99                                                                                                 | Uncertain                                                                                                                                                                                                                                                                                                                                                                                                                                                                                                                                                                                       |   |                       |   |                          |    |                               |   |                                               |   |                                  |   |                                |   |                                 |   |                    |    |                      |
| Explain why you think there is a discrepancy and whether this discrepancy is potentially important | text                                                                                                                                                                                                                                                                                                                                                                                                                                                                                                                                                                                            |   |                       |   |                          |    |                               |   |                                               |   |                                  |   |                                |   |                                 |   |                    |    |                      |
| Did the authors provide justification for the change/discrepancy?                                  | <div>multiple-choice</div> <table border="1"> <tr><td>1</td><td>Yes</td></tr> <tr><td>0</td><td>No</td></tr> <tr><td>99</td><td>Justification not needed</td></tr> </table>                                                                                                                                                                                                                                                                                                                                                                                                                     | 1 | Yes                   | 0 | No                       | 99 | Justification not needed      |   |                                               |   |                                  |   |                                |   |                                 |   |                    |    |                      |
| 1                                                                                                  | Yes                                                                                                                                                                                                                                                                                                                                                                                                                                                                                                                                                                                             |   |                       |   |                          |    |                               |   |                                               |   |                                  |   |                                |   |                                 |   |                    |    |                      |
| 0                                                                                                  | No                                                                                                                                                                                                                                                                                                                                                                                                                                                                                                                                                                                              |   |                       |   |                          |    |                               |   |                                               |   |                                  |   |                                |   |                                 |   |                    |    |                      |
| 99                                                                                                 | Justification not needed                                                                                                                                                                                                                                                                                                                                                                                                                                                                                                                                                                        |   |                       |   |                          |    |                               |   |                                               |   |                                  |   |                                |   |                                 |   |                    |    |                      |

| Question                                        | Options |
|-------------------------------------------------|---------|
| What was the justification provided by authors? | text    |

## Additional File 6. Examples of important and non-important discrepancies

| Item                             | Non-important discrepancies                                                                                                                                                                                                                                                                                                                                                                                                                                                                                                                                                                                                                                                                                                                                                                                                                                              | Important discrepancies                                                                                                                                                                                                                                                                                                                                                                                                                                                                                                                                                                                                                                |
|----------------------------------|--------------------------------------------------------------------------------------------------------------------------------------------------------------------------------------------------------------------------------------------------------------------------------------------------------------------------------------------------------------------------------------------------------------------------------------------------------------------------------------------------------------------------------------------------------------------------------------------------------------------------------------------------------------------------------------------------------------------------------------------------------------------------------------------------------------------------------------------------------------------------|--------------------------------------------------------------------------------------------------------------------------------------------------------------------------------------------------------------------------------------------------------------------------------------------------------------------------------------------------------------------------------------------------------------------------------------------------------------------------------------------------------------------------------------------------------------------------------------------------------------------------------------------------------|
| <b>Primary research question</b> |                                                                                                                                                                                                                                                                                                                                                                                                                                                                                                                                                                                                                                                                                                                                                                                                                                                                          |                                                                                                                                                                                                                                                                                                                                                                                                                                                                                                                                                                                                                                                        |
| A. Primary research question     | <ul style="list-style-type: none"> <li>The intervention was only described broadly in the protocol but was specifically defined in the results report.</li> </ul> <p>Example: Protocol (P) tailored, multifaceted, interventions designed to increase the translation of research findings into practice; Results report (RR) a tailored intervention designed to increase primary health care professionals' adoption of a national recommendation for postnatal depression</p>                                                                                                                                                                                                                                                                                                                                                                                         | <ul style="list-style-type: none"> <li>Discrepancy in any of the elements that made up the primary research question (participants, intervention, comparator)</li> </ul> <p>Example:</p> <p>(P) The analysis will compare post-interruption to pre-interruption in the intervention group; (RR) The analysis compared the pre-post difference in the intervention with that of the control group.</p> <p>(P) We will recruit patients from home care offices and supportive living sites; (RR) We will recruit patients from home care offices.</p> <p>(P) The study will take place in two cities; (RR) The study was conducted in one city only.</p> |
| <b>Data collection</b>           |                                                                                                                                                                                                                                                                                                                                                                                                                                                                                                                                                                                                                                                                                                                                                                                                                                                                          |                                                                                                                                                                                                                                                                                                                                                                                                                                                                                                                                                                                                                                                        |
| B. Eligibility criteria          | <ul style="list-style-type: none"> <li>The results report added details for the existing inclusion or exclusion criteria.</li> <li>Discrepancies were unlikely to result in a significant change in demographics of the recruited population</li> </ul> <p>Examples:</p> <p>(P) The recruitment period will be from 1st September 2015 to 31st August 2018; (RR) The recruitment period will be from 2nd August 2015 to 31 August 2018.</p> <p>(P) Participants will be deemed inactive if they report 0 or 1 day of moderate-vigorous physical activity; (RR) Participants were deemed inactive if they report &lt;3 days of moderate-vigorous physical activity.</p> <p>Example: (P) internal medicine departments of medical centre X, hospital centre Y, and hospital centre Z; (RR) departments of internal medicine of 3 teaching hospitals in the Netherlands</p> | <ul style="list-style-type: none"> <li>The results report added or removed inclusion or exclusion criteria.</li> </ul> <p>Examples:</p> <p>(P) Authors reported eligibility criteria for the study sites (hospitals) only. (RR) Authors reported eligibility criteria for both the hospitals and the participants.</p> <p>(P) Neonates will not be included if one of the parents refuse his/her participation in the study. (RR) Neonates were excluded if their parents refused consent, or if they presented with major congenital malformations or underwent surgery and required endotracheal intubation.</p>                                     |
| C. Data sources                  | <ul style="list-style-type: none"> <li>Data source was officially renamed (but was the same source).</li> <li>Data source was broadly defined in the protocol and further specified in the results report.</li> </ul> <p>Example: (P) national maternity surveys; (RR) Care Quality Commission and National Perinatal Epidemiology Unit surveys (both are national maternity surveys in the United Kingdom)</p>                                                                                                                                                                                                                                                                                                                                                                                                                                                          | <ul style="list-style-type: none"> <li>The results report added, removed or changed data sources.</li> </ul>                                                                                                                                                                                                                                                                                                                                                                                                                                                                                                                                           |

| Item                                                      | Non-important discrepancies                                                                                                                                                                                                                                                                                                                                                                                                                                                                                                                                                                                                                | Important discrepancies                                                                                                                                                                                                                                                                                                                                                                                                                                                                                                                                                                                                                                                                                                                                                                                                                                                                                                                                                                                                                                                                                               |
|-----------------------------------------------------------|--------------------------------------------------------------------------------------------------------------------------------------------------------------------------------------------------------------------------------------------------------------------------------------------------------------------------------------------------------------------------------------------------------------------------------------------------------------------------------------------------------------------------------------------------------------------------------------------------------------------------------------------|-----------------------------------------------------------------------------------------------------------------------------------------------------------------------------------------------------------------------------------------------------------------------------------------------------------------------------------------------------------------------------------------------------------------------------------------------------------------------------------------------------------------------------------------------------------------------------------------------------------------------------------------------------------------------------------------------------------------------------------------------------------------------------------------------------------------------------------------------------------------------------------------------------------------------------------------------------------------------------------------------------------------------------------------------------------------------------------------------------------------------|
| <b>Design of time series</b>                              |                                                                                                                                                                                                                                                                                                                                                                                                                                                                                                                                                                                                                                            |                                                                                                                                                                                                                                                                                                                                                                                                                                                                                                                                                                                                                                                                                                                                                                                                                                                                                                                                                                                                                                                                                                                       |
| D. Overall length of the time series                      | <ul style="list-style-type: none"> <li>Authors stated "at least x data points" in the protocol and provided a specific number of data points in the results report that aligned.<br/>Example: (P) at least 24 data points; (RR) 36 data points</li> <li>Authors stated in the protocol that there was a possibility of extending or changing the data collection period, and the change in the results report aligned with the authors' prediction.</li> <li>The number of discrepant data points was not substantive compared to the overall length of the time series.<br/>Example: (P) 120 data points; (RR) 121 data points</li> </ul> | <ul style="list-style-type: none"> <li>The number of discrepant data points was substantive compared to the overall length of the time series.<br/>Example: (P) 24 data points; (RR) 36 data points → difference of 12 data points (50%)</li> </ul>                                                                                                                                                                                                                                                                                                                                                                                                                                                                                                                                                                                                                                                                                                                                                                                                                                                                   |
| E. Start and end dates of each segment in the time series | <ul style="list-style-type: none"> <li>The discrepancy in dates was not substantive compared to the overall time series (e.g., few omitted data points in a stable time series with limited seasonality).</li> <li>Authors stated in the protocol that there was a possibility of extending or changing the data collection period, and the change in the results report aligned with the authors' prediction.</li> </ul>                                                                                                                                                                                                                  | <ul style="list-style-type: none"> <li>The discrepancy in dates was substantive compared to the overall time series.<br/>Example: (P) Jan 2010-Dec 2015; (RR) Jan 2001-Dec 2015 → difference of 9 years (60% the length of RR)</li> <li>The change in dates might have led to unaccounted events to have impact on outcomes.<br/>Example: (P) Jan 2010-Dec 2015; (RR) Jan 2013-Mar 2015. The outcome was all-cause mortality. Between 2010 and 2015, there could be potentially many different socioeconomic events or policies that impacted mortality.</li> <li>The omitted/added data points resulting from the change in dates might be important to establish underlying trends (e.g., pre-interruption or post-interruption slopes, seasonal pattern).<br/>Examples:<br/>A data point near the inflexion point or near the interruption was more likely to change the effect if omitted, compared to a datapoint that was in the centre of the segment.<br/>An outlier was more likely to change the effect if omitted, compared to a data point that is relatively similar to adjacent data points.</li> </ul> |
| F. No. data points in each segment in the time series     | <ul style="list-style-type: none"> <li>The number of discrepant data points was not substantive compared to the length of the corresponding time segment.</li> <li>Authors stated in the protocol that there was a possibility of extending or changing the data collection period, and the change in the results report aligned with the authors' prediction.</li> </ul>                                                                                                                                                                                                                                                                  | <ul style="list-style-type: none"> <li>The number of discrepant data points was substantive compared to the length of the corresponding time segment.</li> <li>The change in lengths of the segments might have led to an imbalanced time series.<br/>Example: Two segments: (P) Jan 2012-Dec 2012, Jan 2013-Dec 2013 (12:12 data points); (RR) Apr 2015-Dec 2012, Jan 2013-Mar 2014 (9:15 data points). The overall length of the time series remained the same, but each segment had a discrepancy of 3 data points (25% the length of the original segment). Moreover, the time series was balanced in the protocol but became imbalanced in the results report.</li> </ul>                                                                                                                                                                                                                                                                                                                                                                                                                                        |

| Item                                                                     | Non-important discrepancies                                                                                                                                                                                                                                                                                                         | Important discrepancies                                                                                                                                                                                                                                                                                                                                                                                                                                                                                                                                                                                                                                                                                                                                                                                                                                                             |
|--------------------------------------------------------------------------|-------------------------------------------------------------------------------------------------------------------------------------------------------------------------------------------------------------------------------------------------------------------------------------------------------------------------------------|-------------------------------------------------------------------------------------------------------------------------------------------------------------------------------------------------------------------------------------------------------------------------------------------------------------------------------------------------------------------------------------------------------------------------------------------------------------------------------------------------------------------------------------------------------------------------------------------------------------------------------------------------------------------------------------------------------------------------------------------------------------------------------------------------------------------------------------------------------------------------------------|
| <b>Model characteristics</b>                                             |                                                                                                                                                                                                                                                                                                                                     |                                                                                                                                                                                                                                                                                                                                                                                                                                                                                                                                                                                                                                                                                                                                                                                                                                                                                     |
| G. Start and end dates of each segment in the ITS model                  | Same rules as item E.                                                                                                                                                                                                                                                                                                               | Same rules as item E.                                                                                                                                                                                                                                                                                                                                                                                                                                                                                                                                                                                                                                                                                                                                                                                                                                                               |
| H. No. data points in each segment in the ITS model                      | Same rules as item F.                                                                                                                                                                                                                                                                                                               | Same rules as item F.                                                                                                                                                                                                                                                                                                                                                                                                                                                                                                                                                                                                                                                                                                                                                                                                                                                               |
| I. Time interval(s) at which outcome data was aggregated                 | <ul style="list-style-type: none"> <li>The protocol outlined several potential time intervals for aggregation and the results report used one of those time intervals.</li> </ul>                                                                                                                                                   | <ul style="list-style-type: none"> <li>The results report aggregated using a different time interval.</li> <li>The protocol described an ITS but the results report described a simple pre-post analysis.</li> </ul>                                                                                                                                                                                                                                                                                                                                                                                                                                                                                                                                                                                                                                                                |
| J. How the interruption was modelled                                     | <ul style="list-style-type: none"> <li>The protocol outlined several potential models and the results report used one of those models.</li> <li>The protocol outlined a principle of how a model would be selected and the results report followed that principle when selecting the best suited model for the analysis.</li> </ul> | <ul style="list-style-type: none"> <li>The results report modelled the interruption differently.</li> </ul> <p>Example: (P) Three-segment time series. The interruption was modelled as a standalone time segment. (RR) Two-segment time series. The interruption was excluded from the model.</p>                                                                                                                                                                                                                                                                                                                                                                                                                                                                                                                                                                                  |
| K. Which segments were compared to address the primary research question | Same rules as item J.                                                                                                                                                                                                                                                                                                               | <ul style="list-style-type: none"> <li>The results report compared different pairs of segments.</li> </ul> <p>Example: Three-segment time series. The interruption was modelled as a standalone time segment. (P) The analysis compared the pre-interruption segment with the post-interruption segment (excluding the interruption segment). (RR) The analysis compared the pre-interruption segment with the combined (interruption + post-interruption) segment</p> <ul style="list-style-type: none"> <li>The results report introduced or omitted a control time series for comparison.</li> </ul>                                                                                                                                                                                                                                                                             |
| L. Types of effect measures reported                                     | Same rules as item J.                                                                                                                                                                                                                                                                                                               | <ul style="list-style-type: none"> <li>The results reports added, removed or changed the effect measures reported.</li> </ul> <p>Example: (P) The model describes a level change and a slope change. (RR) Only level changes were reported.</p> <ul style="list-style-type: none"> <li>The model in the results report was different from the model in the protocol, resulting in a different parameter being generated and reported.</li> </ul> <p>Example: (P) The model describes a level change and a slope change. (RR) The model describes a level change, a slope change and introduced an interaction term (group x time). (<i>group</i> refers to the intervention vs control group)</p> <ul style="list-style-type: none"> <li>The protocol described an ITS but the results report described a difference-in-difference analysis or simple pre-post analysis.</li> </ul> |

| Item                                                      | Non-important discrepancies                                                                                                                                                                                                                                                                                                                                                                                                                                                                                                                                                                                                                    | Important discrepancies                                                                                                                                                                                                                                                                                                                                                                                                                                                                                                                                                                                                                                                                                                                         |
|-----------------------------------------------------------|------------------------------------------------------------------------------------------------------------------------------------------------------------------------------------------------------------------------------------------------------------------------------------------------------------------------------------------------------------------------------------------------------------------------------------------------------------------------------------------------------------------------------------------------------------------------------------------------------------------------------------------------|-------------------------------------------------------------------------------------------------------------------------------------------------------------------------------------------------------------------------------------------------------------------------------------------------------------------------------------------------------------------------------------------------------------------------------------------------------------------------------------------------------------------------------------------------------------------------------------------------------------------------------------------------------------------------------------------------------------------------------------------------|
| <b>Statistical analysis</b>                               |                                                                                                                                                                                                                                                                                                                                                                                                                                                                                                                                                                                                                                                |                                                                                                                                                                                                                                                                                                                                                                                                                                                                                                                                                                                                                                                                                                                                                 |
| M. ITS analysis method(s)                                 | <ul style="list-style-type: none"> <li>The result report elaborated on the method described in the protocol.<br/>Example: (P) segmented regression; (RR) segmented logistic regression for binary outcomes and segmented linear regression for linear outcomes.</li> <li>The protocol outlined a principle of how the method would be selected and the results report followed that principle when selecting the best suited analysis method.<br/>Example: (P) mixed Poisson model or negative binomial model if there is overdispersion; (RR) mixed-effects negative binomial model (authors provided evidence for overdispersion)</li> </ul> | <ul style="list-style-type: none"> <li>The results report used a different regression method.<br/>Examples:<br/>(P) segmented linear regression; (RR) segmented binomial regression<br/>(P) generalised linear regression; (RR) generalised logistic mixed models</li> <li>The results report used a different approach to model different sites.<br/>Example: (P) A single model with random effects for different sites; (RR) Multiple separate analyses for different sites.</li> <li>The protocol described ITS analysis methods (e.g., segmented regression) but the results report described difference-in-difference analysis or simple pre-post analysis.</li> </ul>                                                                    |
| N. Decision rule on whether to adjust for autocorrelation | <ul style="list-style-type: none"> <li>The protocol outlined the general principle of how autocorrelation will be adjusted, and the results report elaborated on the steps taken.<br/>Example: (P) If more than one candidate model results in a stationary time series without autocorrelation, we will conduct likelihood ratio tests to identify the model with best model fit. (RR) The best model was selected based on AIC/BIC values.</li> </ul>                                                                                                                                                                                        | <ul style="list-style-type: none"> <li>The results report adopted a different approach to make the decision on autocorrelation adjustment.<br/>Example: (P) The data will be adjusted for autocorrelation and the underlying secular trend. (RR) If a Durbin-Watson test result was significant, we adjusted the model using autoregressive integrated moving average.</li> </ul>                                                                                                                                                                                                                                                                                                                                                               |
| O. Method(s) of testing for autocorrelation               | <ul style="list-style-type: none"> <li>The protocol specified the method and the results report elaborated on the details of the method.<br/>Example: (P) The Durbin-Watson test for autocorrelation will be used. (R) The Durbin-Watson test was used. A Durbin-Watson value close to 2 suggests no autocorrelation; values below 2 indicate positive autocorrelation, and those above 2 signify negative autocorrelation.</li> </ul>                                                                                                                                                                                                         | <ul style="list-style-type: none"> <li>The results report added or removed method(s).<br/>Example: (P) Durbin-Watson test; (RR) Visual inspection of residual, autocorrelation, and partial autocorrelation function plots</li> <li>The results report used the same general method but changed the specific test(s) used.<br/>Example: (P) Cumby-Huizinga test (RR) Cumby-Huizinga test and Durbin-Watson test</li> </ul>                                                                                                                                                                                                                                                                                                                      |
| P. Method(s) of adjusting for autocorrelation             | <ul style="list-style-type: none"> <li>The protocol specified the method and the results report elaborated on the details of the method.<br/>Example: (P) If autocorrelation is present, an autocorrelation parameter will be included in the model. (RR) Autocorrelation parameters up to lag 12 were included and reduced using backward elimination in order to fit the most parsimonious model.</li> </ul>                                                                                                                                                                                                                                 | <ul style="list-style-type: none"> <li>The results report added or removed method(s), or used a different method.<br/>Example: (P) Two modelling processes will be used to account for serial dependence: intervention models and linear models. (RR) ARIMA model was used. The form of the ARIMA model was determined using the auto.arima function.</li> <li>The results report used the same general method but used different parameters that could have produced different results.<br/>Example: (P) ARIMA model with first-order autoregressive AR(1) model; (RR) The autocorrelation and moving average parameters were selected using the automated auto.arima function in R (which could have produced different AR terms).</li> </ul> |

| Item                                                      | Non-important discrepancies                                                                                                                                                                                                                                                                                                                                                                                                                                                                                                                                                                      | Important discrepancies                                                                                                                                                                                                                                                                                                                                                                                                                                                                                                           |
|-----------------------------------------------------------|--------------------------------------------------------------------------------------------------------------------------------------------------------------------------------------------------------------------------------------------------------------------------------------------------------------------------------------------------------------------------------------------------------------------------------------------------------------------------------------------------------------------------------------------------------------------------------------------------|-----------------------------------------------------------------------------------------------------------------------------------------------------------------------------------------------------------------------------------------------------------------------------------------------------------------------------------------------------------------------------------------------------------------------------------------------------------------------------------------------------------------------------------|
| Q. Method(s) of testing & adjusting for seasonality       | <ul style="list-style-type: none"> <li>The protocol specified the method and the results report elaborated on the details of the method.</li> <li>The protocol outlined the general principle of how seasonality will be adjusted, and the results report follows that principle (even if it means seasonality was eventually not adjusted for).</li> </ul> <p>Example: (P) The time component will include a seasonal effect. (RR) Plotting the proportion of precise variables showed no obvious seasonal effects or trends and, therefore, seasonal effects were not added to the models.</p> | <ul style="list-style-type: none"> <li>The results report added or removed method(s), or used a different method.<br/>Example: (P) Seasonal ARIMA (SARIMA) model will be used. (RR) Spline-based model was used to capture seasonal trends.</li> <li>The results report used the same general method but used different parameters that could have produced different results.<br/>Example: Both the protocol and results report used a spline-based model but the splines had different number and location of knots.</li> </ul> |
| R. Method(s) of testing & adjusting for non-stationarity  | <ul style="list-style-type: none"> <li>The protocol specified the method and the results report elaborated on the details of the method.</li> <li>The protocol outlined the general principle of how non-stationarity will be adjusted, and the results report follows that principle (even if it means non-stationarity was eventually not adjusted for).</li> </ul>                                                                                                                                                                                                                            | <ul style="list-style-type: none"> <li>The results report added or removed method(s), or used a different method.</li> <li>The results report used the same general method but used different parameters that could have produced different results.</li> </ul>                                                                                                                                                                                                                                                                   |
| S. Presence and type of control series                    | <ul style="list-style-type: none"> <li>Both the protocol and results report stated there was a control time series, but the details of the control varied.</li> </ul> <p>Examples: different locations for control sites; different control outcomes.</p>                                                                                                                                                                                                                                                                                                                                        | <ul style="list-style-type: none"> <li>The protocol stated there was no control time series and the results report used a control time series, or vice versa.</li> </ul>                                                                                                                                                                                                                                                                                                                                                          |
| T. Method(s) of comparing intervention and control series | <ul style="list-style-type: none"> <li>The protocol specified the method and the results report elaborated on the details of the method.</li> </ul>                                                                                                                                                                                                                                                                                                                                                                                                                                              | <ul style="list-style-type: none"> <li>The results report added or removed method(s), or used a different method.</li> </ul>                                                                                                                                                                                                                                                                                                                                                                                                      |

*Notes: When assessing discrepancies, the reviewers prioritised information that was explicitly stated in the respective articles, and deprioritised information that required assumption or inference by the reviewers. For example, the authors might include the following introduction about the ITS design, "An ITS model typically measures a level change and a slope change". However, we would not assume that the authors intended to report estimates of level and slope change unless directly specified by the authors. In another example, the authors might state that "A researcher visited the site and recorded data every month". This only refers to the frequency of data collection – we would not assume that the data would be aggregated into monthly intervals for the time series.*





## Additional File 7. Study design and analysis methods reported

| Item                                                                                         | Protocols<br>(N=44) | Results reports<br>(N=44) |
|----------------------------------------------------------------------------------------------|---------------------|---------------------------|
| <b>Characteristics of the time series</b>                                                    |                     |                           |
| <b>No. data points in the overall time series, median (IQR)</b>                              | 36 (26 to 58)       | 36 (24 to 70)             |
| <b>No. segments in the time series, median (IQR)</b>                                         | 3 (2 to 3)          | 3 (2 to 3)                |
| Two segments                                                                                 | 16 (36%)            | 21 (48%)                  |
| More than two segments                                                                       | 24 (55%)            | 22 (50%)                  |
| <b>The ITS model</b>                                                                         |                     |                           |
| <b>No. segments in the ITS model median (IQR)</b>                                            | 2 (2 to 3)          | 2 (2 to 3)                |
| Two segments                                                                                 | 20 (45%)            | 28 (64%)                  |
| More than two segments                                                                       | 12 (27%)            | 14 (32%)                  |
| <b>Time interval(s) at which outcome data was aggregated</b>                                 |                     |                           |
| Weekly                                                                                       | 2 (5%)              | 3 (7%)                    |
| Monthly                                                                                      | 24 (55%)            | 26 (59%)                  |
| Quarterly                                                                                    | 6 (14%)             | 3 (7%)                    |
| Two periods only (pre- and post-interruption)                                                | 0 (0%)              | 7 (16%)                   |
| Other                                                                                        | 6 (14%)             | 7 (16%)                   |
| <b>How the intervention was modelled</b>                                                     |                     |                           |
| Not modelled - the intervention period was excluded from the time series                     | 10 (23%)            | 7 (16%)                   |
| As a separate intervention period                                                            | 9 (20%)             | 12 (27%)                  |
| As part of the post-intervention period                                                      | 15 (34%)            | 20 (45%)                  |
| <b>Types of effect measures reported</b>                                                     |                     |                           |
| Level change (e.g., immediate or long-term)                                                  | 22 (50%)            | 27 (61%)                  |
| Slope change                                                                                 | 22 (50%)            | 21 (48%)                  |
| Other ITS effect measure(s) quantifying impact of interruption (e.g. regression coefficient) | 3 (7%)              | 6 (14%)                   |
| Other non-ITS effect measure(s) quantifying impact of interruption                           | -                   | 15 (34%)                  |
| Cannot be determined                                                                         | -                   | 2 (5%)                    |

| Item                                                                                                                | Protocols<br>(N=44)     | Results reports<br>(N=44) |
|---------------------------------------------------------------------------------------------------------------------|-------------------------|---------------------------|
| <b>Statistical analysis methods</b>                                                                                 |                         |                           |
| <b>ITS analysis method(s)</b>                                                                                       |                         |                           |
| ARIMA                                                                                                               | 5 (11%)                 | 5 (11%)                   |
| Regression (linear, logistic, binominal, negative binomial or Poisson)                                              | 25 (57%)                | 29 (66%)                  |
| Generalized linear models                                                                                           | 6 (14%)                 | 8 (18%)                   |
| Other                                                                                                               | 3 (7%)                  | 3 (7%)                    |
| <b>Acknowledgement of autocorrelation</b>                                                                           | 16 (36%)                | 22 (50%)                  |
| <b>Decision rule on whether to adjust for autocorrelation</b>                                                       |                         |                           |
| Always adjusted for autocorrelation                                                                                 | 5 (11%)                 | 5 (11%)                   |
| Decision to adjust based on a visual or statistical test for presence of autocorrelation                            | 3 (7%)                  | 4 (9%)                    |
| Other                                                                                                               | 5 (11%)                 | 9 (20%)                   |
| <b>Method(s) to detect presence of autocorrelation</b>                                                              |                         |                           |
| Statistical test (e.g. Durbin-Watson, Breusch-Godfrey, Ljung-Box, Cumby-Huizinga tests)                             | 5/39 <sup>a</sup> (13%) | 11/39 (28%)               |
| Visual inspection of time series (autocorrelation and partial autocorrelation function plots, histogram)            | 5/39 (13%)              | 6/39 (15%)                |
| Other                                                                                                               | 1/39 (3%)               | 7/39 (18%)                |
| <b>Method(s) of adjusting for autocorrelation</b>                                                                   |                         |                           |
| Used non-ARIMA methods to adjust (e.g. Newey-West, Prais-Winsten) or modelled autocorrelation (by adding lag terms) | 5 (11%)                 | 10 (23%)                  |
| Directly modelled the error structure using ARIMA                                                                   | 5 (11%)                 | 5 (11%)                   |
| <b>Acknowledgement of seasonality</b>                                                                               | 11 (25%)                | 15 (34%)                  |
| <b>Method(s) to detect &amp; adjust for seasonality</b>                                                             |                         |                           |
| Not applicable - author specified seasonality was not adjusted                                                      | 0 (0%)                  | 3 (7%)                    |
| Determined whether seasonality was present, either visually or via a statistical test                               | 1 (2%)                  | 3 (7%)                    |

| Item                                                                                                                            | Protocols<br>(N=44)     | Results reports<br>(N=44) |
|---------------------------------------------------------------------------------------------------------------------------------|-------------------------|---------------------------|
| Adjusted by adding a regression term for time (e.g. months, seasons) into model                                                 | 3 (7%)                  | 5 (11%)                   |
| Adjusted by fitting a spline function of time into model                                                                        | 3 (7%)                  | 2 (5%)                    |
| Adjusted by other method(s)                                                                                                     | 2 (5%)                  | 2 (5%)                    |
| <b>Acknowledgement of non-stationarity</b>                                                                                      | 2 (5%)                  | 4 (9%)                    |
| <b>Method(s) to detect &amp; adjust for non-stationarity</b>                                                                    |                         |                           |
| Not applicable – author specified non-stationarity was not adjusted                                                             | 0 (0%)                  | 1 (2%)                    |
| Determined whether non-stationarity was present, either visually or via a statistical test (e.g., Augmented Dickey-Fuller test) | 2 (5%)                  | 3 (7%)                    |
| Transformed to stationary series by differencing                                                                                | 5 (11%)                 | 7 (16%)                   |
| Other                                                                                                                           | 0 (0%)                  | 1 (2%)                    |
| <b>Presence and type of control series</b>                                                                                      |                         |                           |
| Control series was used                                                                                                         | 18 (41%)                | 18 (41%)                  |
| Control series was not used                                                                                                     | 11 (25%)                | 26 (59%)                  |
| <b>Method(s) of comparing intervention and control series</b>                                                                   |                         |                           |
| Presenting the control series independently, without comparing to the intervention series                                       | 2/18 <sup>b</sup> (11%) | 7/18 (39%)                |
| A single model that includes both the intervention and control series                                                           | 2/18 (11%)              | 7/18 (39%)                |
| Other                                                                                                                           | 2/18 (11%)              | 4/18 (22%)                |

*Abbreviations: ARIMA: autoregressive integrated moving average; IQR: interquartile range; ITS: interrupted time series; RR: results report*

*In each item, percentages may not add up to 100% as some studies did not report the item.*

<sup>a</sup> *For the item "Method(s) of testing for autocorrelation", the denominator only includes studies where the authors said they might test for presence of autocorrelation.*

<sup>b</sup> *For the item "Method(s) of comparing intervention and control series", the denominator only includes studies where there was a control series.*

## Additional File 8. Justifications provided by authors for discrepancies

| Justification provided for discrepancy                                                                                                                          | No. studies with this justification | No. studies where this item had a discrepancy that was justified with this justification |                            |                             |                                  |                                   |                            |                                     |                           |                                    |
|-----------------------------------------------------------------------------------------------------------------------------------------------------------------|-------------------------------------|------------------------------------------------------------------------------------------|----------------------------|-----------------------------|----------------------------------|-----------------------------------|----------------------------|-------------------------------------|---------------------------|------------------------------------|
|                                                                                                                                                                 |                                     | Overall length of time series                                                            | Start/end date of segments | No. data points of segments | Start/end date of segments model | No. data points of segments model | Aggregation time intervals | Statistical method for ITS analysis | Presence of control group | Methods of comparing control group |
| Lack of funding affected data collection                                                                                                                        | 1                                   | 1                                                                                        | 5                          | 1                           | 1                                | 1                                 | -                          | -                                   | -                         | -                                  |
| Data collection / implementation was hindered by COVID-19 restrictions                                                                                          | 2                                   | 1                                                                                        | 7                          | 2                           | 1                                | 1                                 | -                          | -                                   | -                         | -                                  |
| Control sites were not available for various reasons e.g. issues with obtaining approval, data not submitted, data collected not matching the intervention site | 1                                   | -                                                                                        | 2                          | -                           | -                                | -                                 | -                          | -                                   | 1                         | 1                                  |
| Actual implementation time differed from plans                                                                                                                  | 1                                   | 1                                                                                        | 1                          | -                           | -                                | -                                 | -                          | -                                   | -                         | -                                  |
| Data collection was extended to investigate attenuation of intervention effect                                                                                  | 1                                   | -                                                                                        | 2                          | 1                           | 1                                | -                                 | -                          | -                                   | -                         | -                                  |
| The intervention series length was reduced to match the control series length                                                                                   | 1                                   | -                                                                                        | 2                          | 1                           | -                                | 1                                 | -                          | -                                   | -                         | -                                  |
| A simpler model was fitted to reduce analysis run time                                                                                                          | 1                                   | -                                                                                        | 1                          | -                           | -                                | -                                 | -                          | 1                                   | -                         | -                                  |
| An outlier time point was dropped                                                                                                                               | 1                                   | -                                                                                        | 1                          | -                           | 1                                | -                                 | -                          | -                                   | -                         | -                                  |
| Time interval was changed to handle rare events                                                                                                                 | 1                                   | -                                                                                        | 1                          | -                           | -                                | -                                 | 1                          | -                                   | -                         | -                                  |

Note: Within one study, the same justification can apply to multiple methods discrepancies. For example, a change of data collection period due to lack of funding can change the overall length of the time series, number of data points in each segment, and the start and end dates of these segments.

## Additional File 9. Frequency of discrepancies by reporting item

Abbreviations: RR: results report

### A. Primary research question

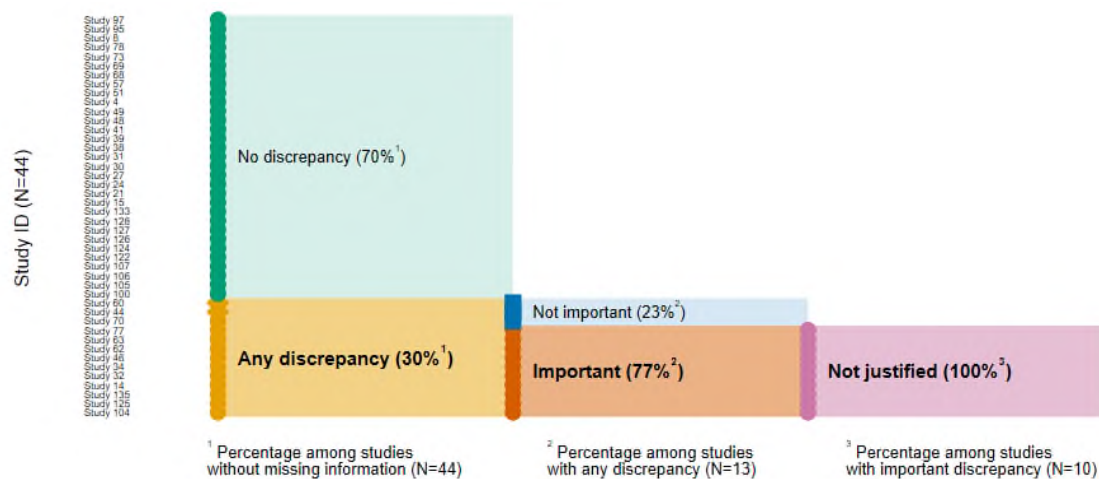

### B. Eligibility criteria

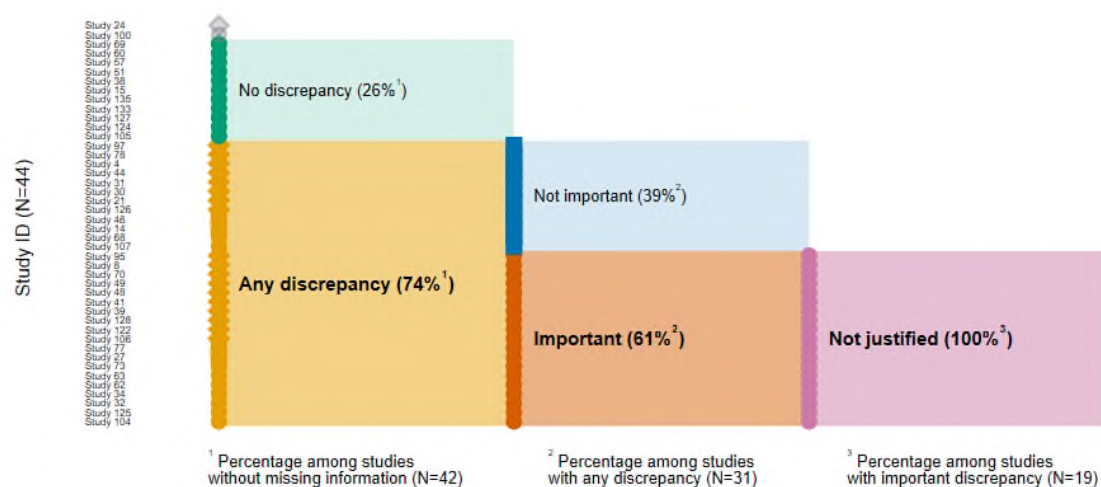

#### SYMBOL KEY

##### Missing information

- Missing in protocol
- Missing in RR
- ◇ Missing in both protocol and RR

##### No discrepancy

- RR details matching protocol

##### Any discrepancy

- RR details did not match protocol
- RR fewer details than protocol
- ◆ RR more details than protocol

##### Importance of discrepancy

- Potential to significantly impact results
- No significant impact on results

##### Justification for discrepancy

- Justification not provided
- Justification provided

## C. Data sources

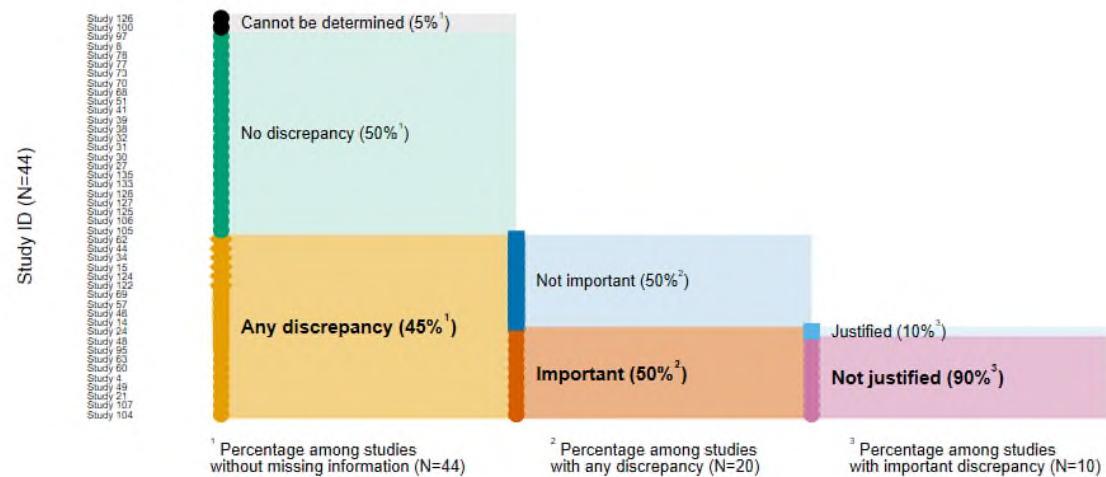

## D. Overall length of the time series

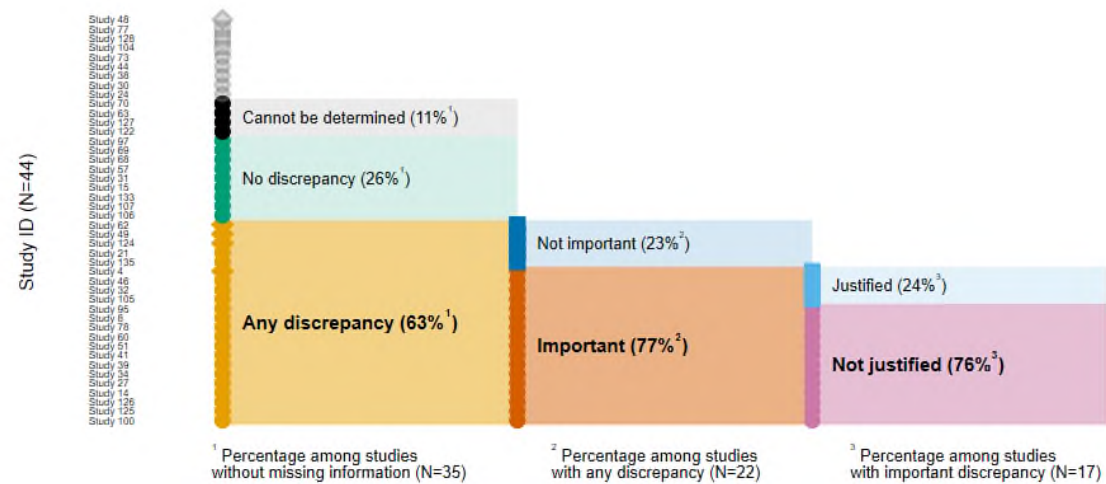

### SYMBOL KEY

#### Missing information

- Missing in protocol
- Missing in RR
- ◆ Missing in both protocol and RR

#### No discrepancy

- RR details matching protocol

#### Any discrepancy

- RR details did not match protocol
- RR fewer details than protocol
- ◆ RR more details than protocol

#### Importance of discrepancy

- Potential to significantly impact results
- No significant impact on results

#### Justification for discrepancy

- Justification not provided
- Justification provided

## E. Start and end dates of each segment in the time series

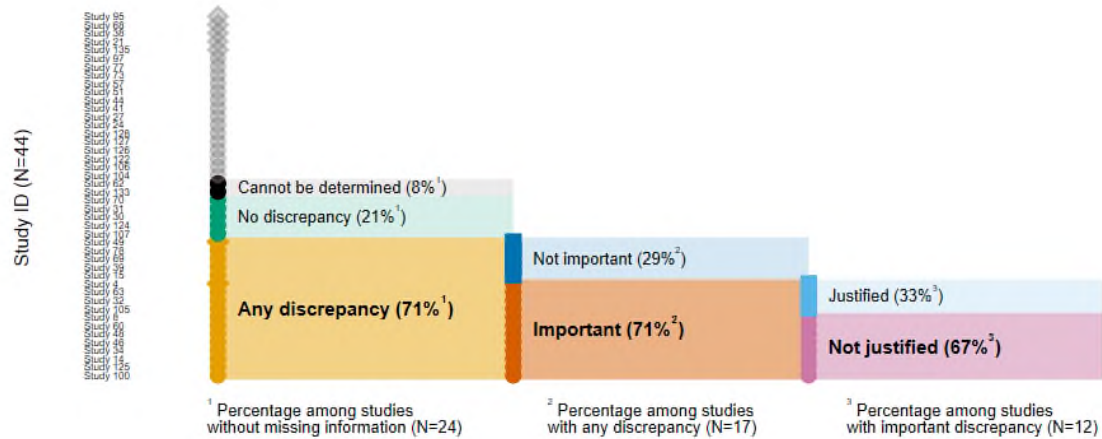

## F. No. data points in each segment in the time series

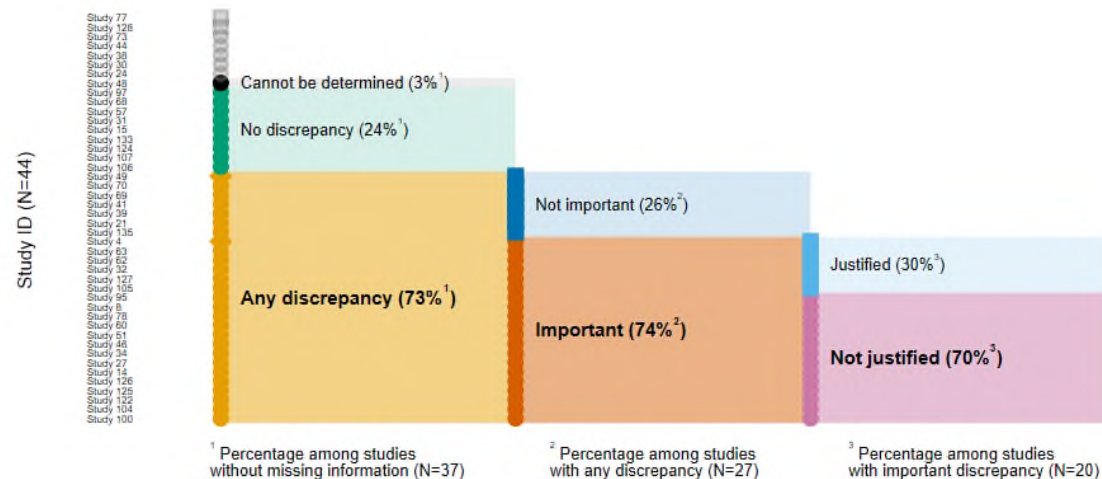

### SYMBOL KEY

#### Missing information

- Missing in protocol
- Missing in RR
- ◆ Missing in both protocol and RR

#### No discrepancy

- RR details matching protocol

#### Any discrepancy

- RR details did not match protocol
- RR fewer details than protocol
- ◆ RR more details than protocol

#### Importance of discrepancy

- Potential to significantly impact results
- No significant impact on results

#### Justification for discrepancy

- Justification not provided
- Justification provided



## G. Start and end dates of each segment in the ITS model

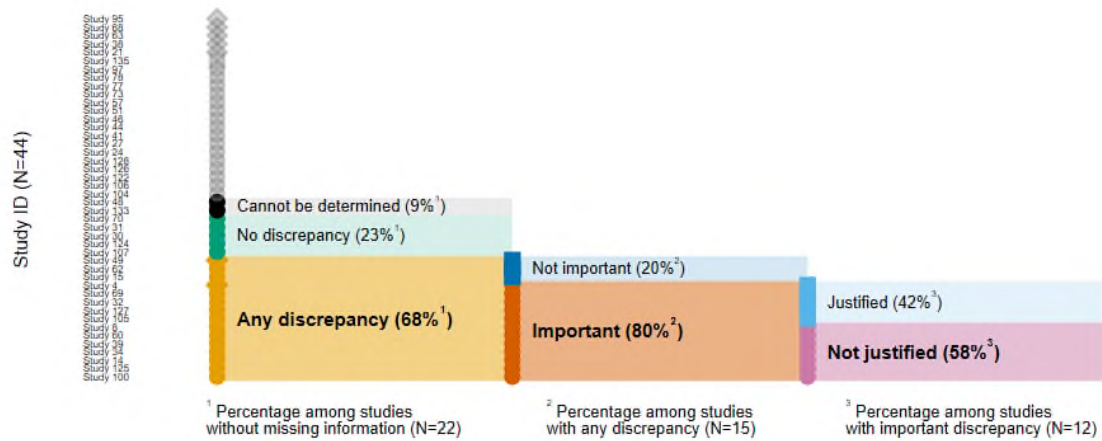

## H. No. data points in each segment in the ITS model

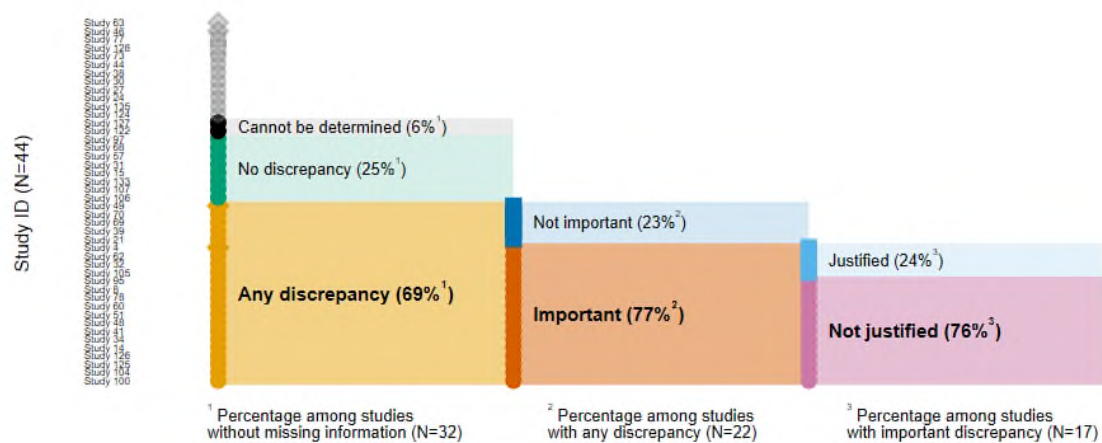

### SYMBOL KEY

#### Missing information

- Missing in protocol
- Missing in RR
- ◆ Missing in both protocol and RR

#### No discrepancy

- RR details matching protocol

#### Any discrepancy

- RR details did not match protocol
- RR fewer details than protocol
- ◆ RR more details than protocol

#### Importance of discrepancy

- Potential to significantly impact results
- No significant impact on results

#### Justification for discrepancy

- Justification not provided
- Justification provided

## I. Time interval(s) at which outcome data was aggregated

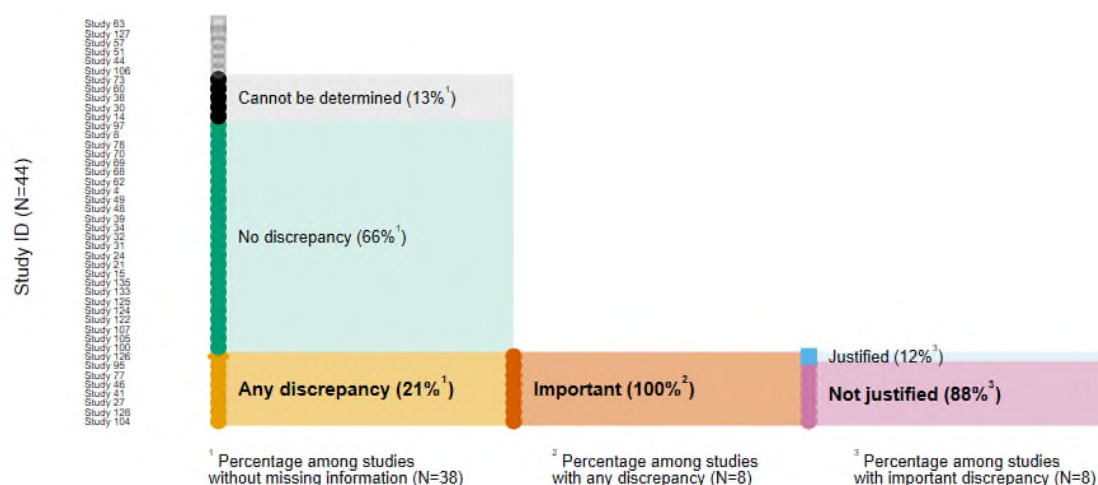

## J. How the interruption was modelled

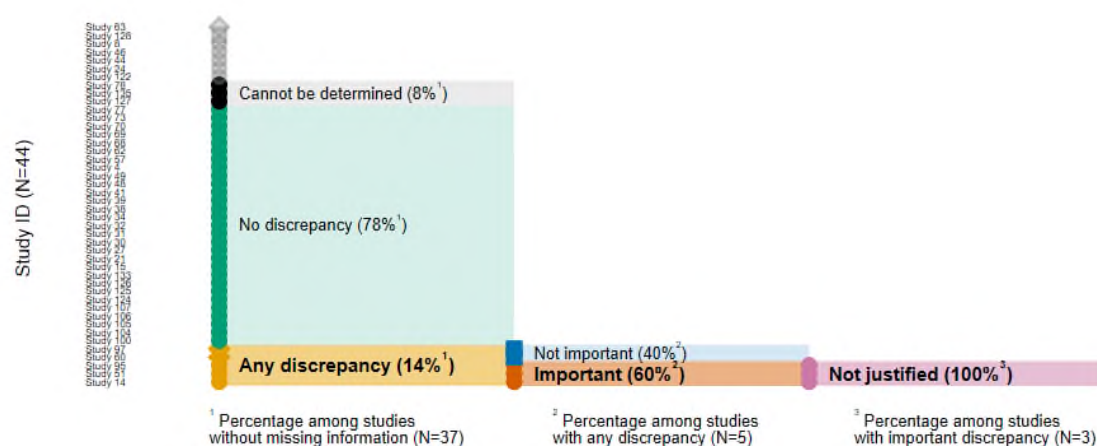

### SYMBOL KEY

#### Missing information

- Missing in protocol
- Missing in RR
- ◆ Missing in both protocol and RR

#### No discrepancy

- RR details matching protocol

#### Any discrepancy

- RR details did not match protocol
- RR fewer details than protocol
- ◆ RR more details than protocol

#### Importance of discrepancy

- Potential to significantly impact results
- No significant impact on results

#### Justification for discrepancy

- Justification not provided
- Justification provided

## K. Which segments were compared to address the primary research question

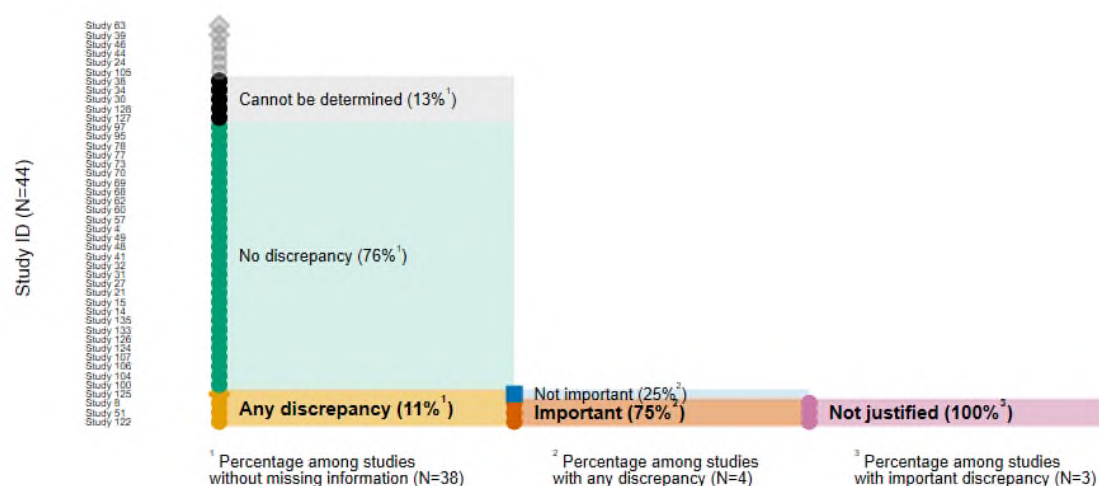

## L. Types of effect measures reported

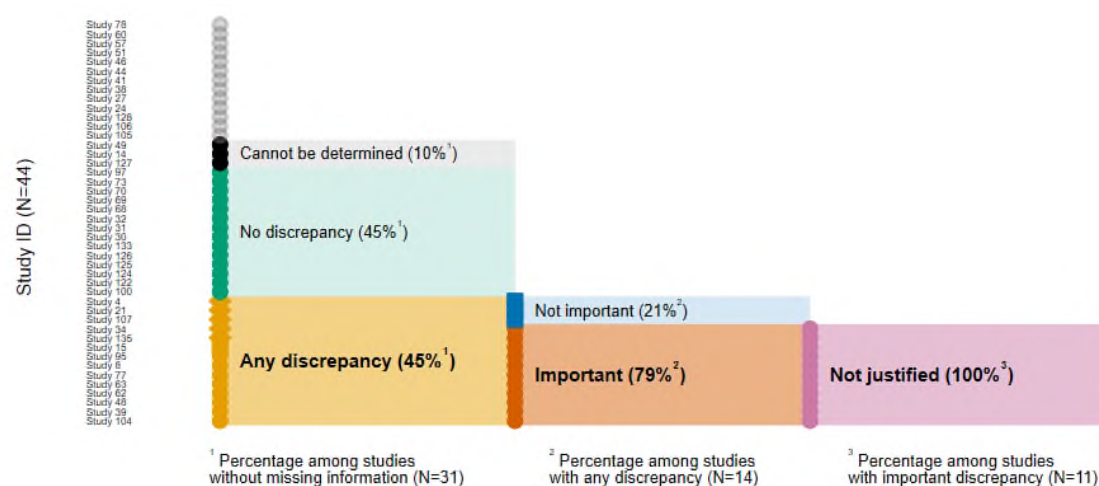

### SYMBOL KEY

#### Missing information

- Missing in protocol
- Missing in RR
- ◇ Missing in both protocol and RR

#### No discrepancy

- RR details matching protocol

#### Any discrepancy

- RR details did not match protocol
- RR fewer details than protocol
- ◆ RR more details than protocol

#### Importance of discrepancy

- Potential to significantly impact results
- No significant impact on results

#### Justification for discrepancy

- Justification not provided
- Justification provided

## M. ITS analysis method(s)

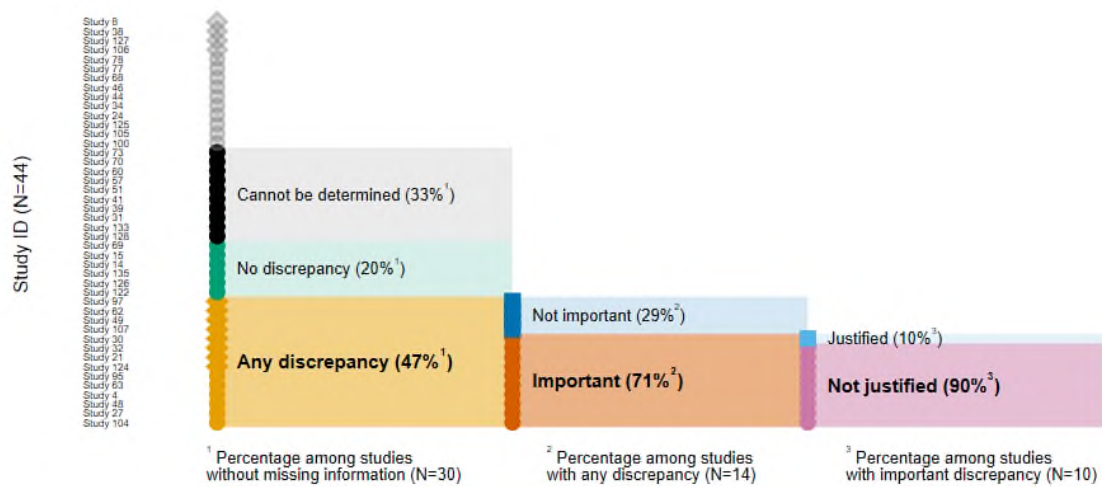

## N. Approach to decide whether to adjust for autocorrelation

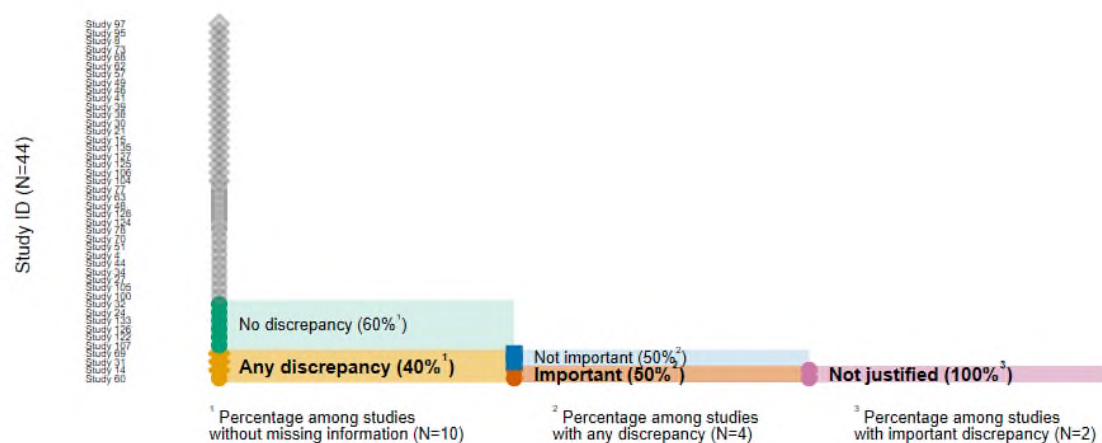

### SYMBOL KEY

#### Missing information

- Missing in protocol
- ◻ Missing in RR
- ◊ Missing in both protocol and RR

#### No discrepancy

- RR details matching protocol

#### Any discrepancy

- RR details did not match protocol
- RR fewer details than protocol
- ◆ RR more details than protocol

#### Importance of discrepancy

- Potential to significantly impact results
- No significant impact on results

#### Justification for discrepancy

- Justification not provided
- Justification provided

## O. Method(s) of testing for autocorrelation

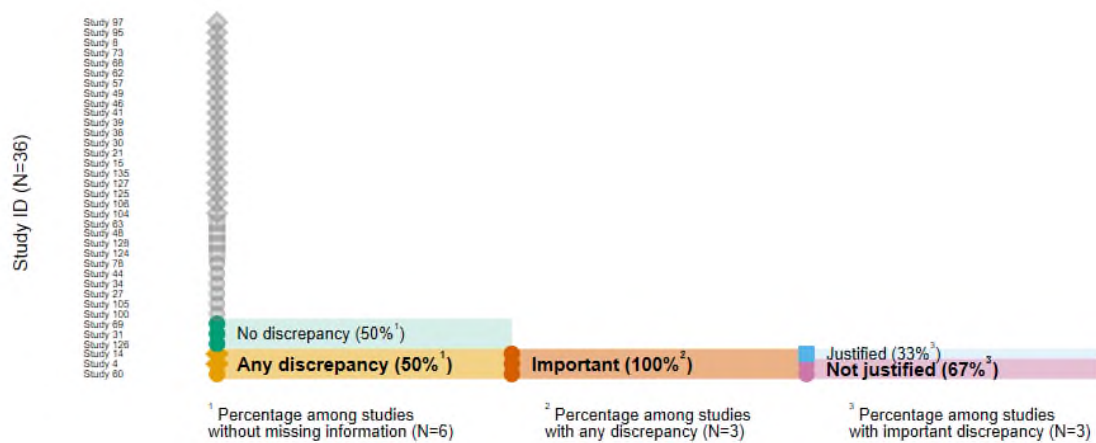

## P. Method(s) of adjusting for autocorrelation

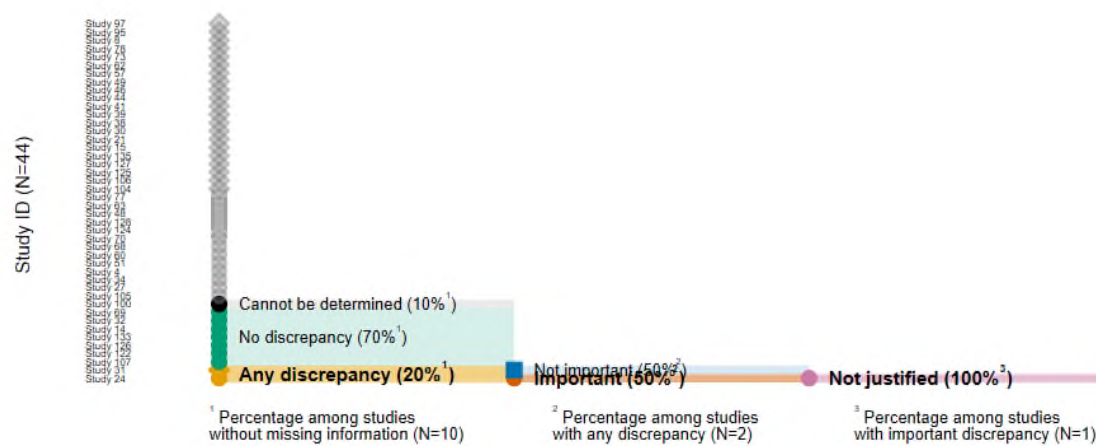

### SYMBOL KEY

#### Missing information

- Missing in protocol
- Missing in RR
- ◆ Missing in both protocol and RR

#### No discrepancy

- RR details matching protocol

#### Any discrepancy

- RR details did not match protocol
- RR fewer details than protocol
- ◆ RR more details than protocol

#### Importance of discrepancy

- Potential to significantly impact results
- No significant impact on results

#### Justification for discrepancy

- Justification not provided
- Justification provided

## Q. Method(s) of testing & adjusting for seasonality

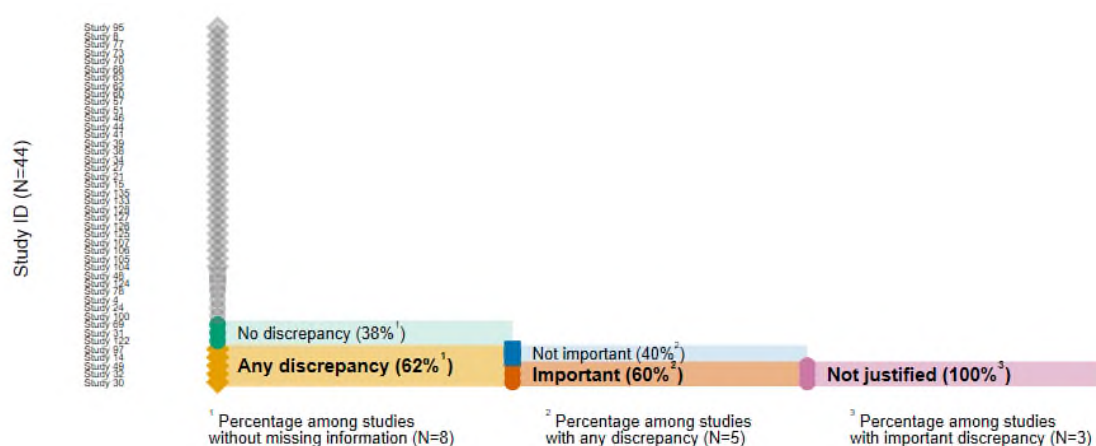

## R. Method(s) of testing & adjusting for non-stationarity

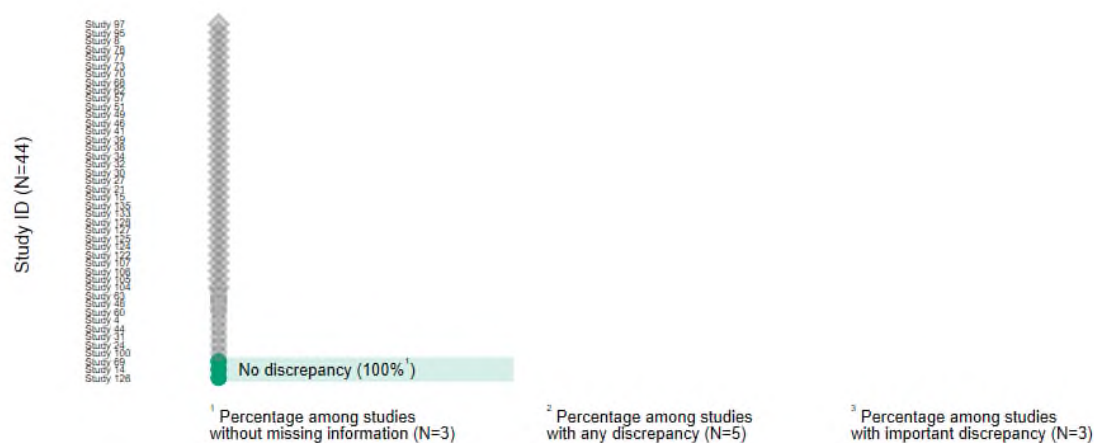

### SYMBOL KEY

#### Missing information

- Missing in protocol
- Missing in RR
- ◇ Missing in both protocol and RR

#### No discrepancy

- RR details matching protocol

#### Any discrepancy

- RR details did not match protocol
- RR fewer details than protocol
- ◆ RR more details than protocol

#### Importance of discrepancy

- Potential to significantly impact results
- No significant impact on results

#### Justification for discrepancy

- Justification not provided
- Justification provided



## S. Presence and type of control series

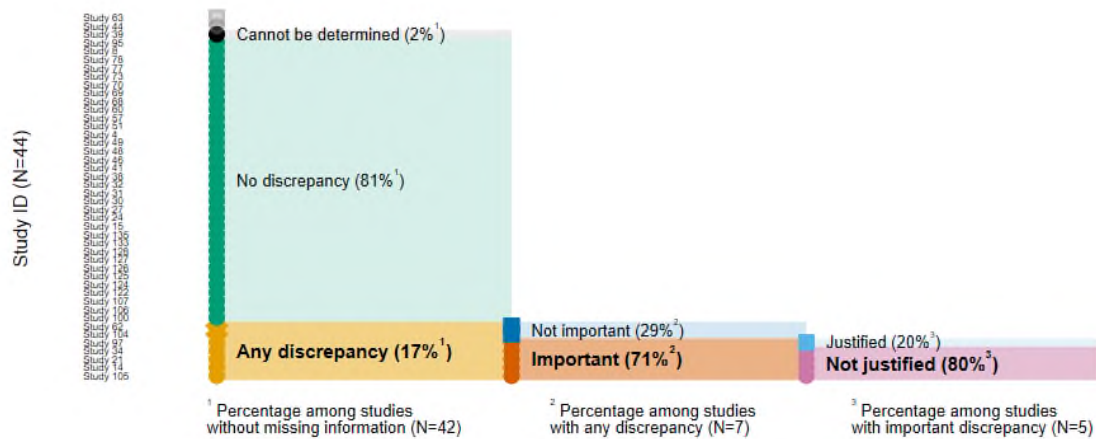

## T. Method(s) of comparing intervention and control series

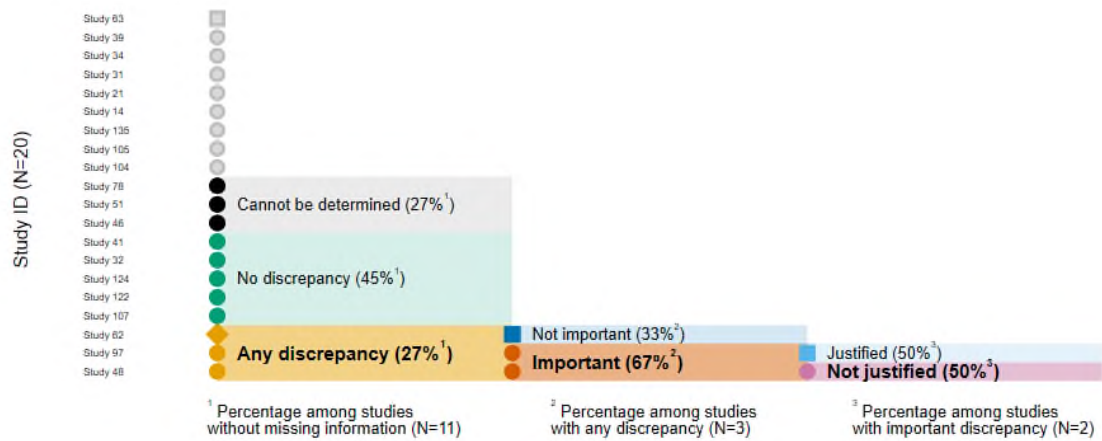

### SYMBOL KEY

#### Missing information

- Missing in protocol
- Missing in RR
- ◇ Missing in both protocol and RR

#### No discrepancy

- RR details matching protocol

#### Any discrepancy

- RR details did not match protocol
- RR fewer details than protocol
- ◆ RR more details than protocol

#### Importance of discrepancy

- Potential to significantly impact results
- No significant impact on results

#### Justification for discrepancy

- Justification not provided
- Justification provided

## Additional File 10. Percentage of discrepancies between protocols and results reports: all categories of discrepancies

| Item                                                  | Discrepancy (%) | Potentially important discrepancy <sup>a</sup> (%) | Justification not provided for discrepancy (%) |
|-------------------------------------------------------|-----------------|----------------------------------------------------|------------------------------------------------|
| <b>Overview of study design</b>                       |                 |                                                    |                                                |
| <b>(A) Primary research question</b>                  |                 |                                                    |                                                |
| Missing information in protocol and/or results report | 0/44 (0%)       | -                                                  | -                                              |
| Any discrepancy between results report and protocol   | 13/44 (30%)     | 10/44 (23%)                                        | 10/10 <sup>b</sup> (100%)                      |
| Results report details did not match protocol         | 11/44 (25%)     | 10/44 (23%)                                        | 10/10 (100%)                                   |
| Results report had fewer details than protocol        | 2/44 (5%)       | 0/44 (0%)                                          | 0/10 (0%)                                      |
| Results report had more details than protocol         | 0/44 (0%)       | 0/44 (0%)                                          | 0/10 (0%)                                      |
| Cannot be determined <sup>c</sup>                     | 0/44 (0%)       | -                                                  | -                                              |
| <b>(B) Eligibility criteria</b>                       |                 |                                                    |                                                |
| Missing information in protocol and/or results report | 2/44 (5%)       | -                                                  | -                                              |
| Any discrepancy between results report and protocol   | 31/44 (70%)     | 19/44 (43%)                                        | 19/19 (100%)                                   |
| Results report details did not match protocol         | 9/44 (20%)      | 7/44 (16%)                                         | 7/19 (37%)                                     |
| Results report had fewer details than protocol        | 18/44 (41%)     | 10/44 (23%)                                        | 10/19 (53%)                                    |
| Results report had more details than protocol         | 4/44 (9%)       | 2/44 (5%)                                          | 2/19 (11%)                                     |
| Cannot be determined                                  | 0/44 (0%)       | -                                                  | -                                              |
| <b>(C) Data sources</b>                               |                 |                                                    |                                                |
| Missing information in protocol and/or results report | 0/44 (0%)       | -                                                  | -                                              |
| Any discrepancy between results report and protocol   | 20/44 (45%)     | 10/44 (23%)                                        | 9/10 (90%)                                     |
| Results report details did not match protocol         | 9/44 (20%)      | 9/44 (20%)                                         | 8/10 (80%)                                     |
| Results report had fewer details than protocol        | 6/44 (14%)      | 0/44 (0%)                                          | 0/10 (0%)                                      |
| Results report had more details than protocol         | 5/44 (11%)      | 1/44 (2%)                                          | 1/10 (10%)                                     |
| Cannot be determined                                  | 2/44 (5%)       | -                                                  | -                                              |
| <b>Characteristics of the time series</b>             |                 |                                                    |                                                |
| <b>(D) Overall length of the time series</b>          |                 |                                                    |                                                |
| Missing information in protocol and/or results report | 9/44 (20%)      | -                                                  | -                                              |



| Item                                                | Discrepancy (%) | Potentially important discrepancy <sup>a</sup> (%) | Justification not provided for discrepancy (%) |
|-----------------------------------------------------|-----------------|----------------------------------------------------|------------------------------------------------|
| Any discrepancy between results report and protocol | 22/44 (50%)     | 17/44 (39%)                                        | 13/17 (76%)                                    |
| Results report details did not match protocol       | 18/44 (41%)     | 16/44 (36%)                                        | 13/17 (76%)                                    |
| Results report had fewer details than protocol      | 4/44 (9%)       | 1/44 (2%)                                          | 0/17 (0%)                                      |
| Results report had more details than protocol       | 0/44 (0%)       | 0/44 (0%)                                          | 0/17 (0%)                                      |
| Cannot be determined                                | 4/44 (9%)       | -                                                  | -                                              |

**(E) Start and end dates of each segment in the time series**

|                                                       |             |             |            |
|-------------------------------------------------------|-------------|-------------|------------|
| Missing information in protocol and/or results report | 20/44 (45%) | -           | -          |
| Any discrepancy between results report and protocol   | 17/44 (39%) | 12/44 (27%) | 8/12 (67%) |
| Results report details did not match protocol         | 15/44 (34%) | 11/44 (25%) | 8/12 (67%) |
| Results report had fewer details than protocol        | 2/44 (5%)   | 1/44 (2%)   | 0/12 (0%)  |
| Results report had more details than protocol         | 0/44 (0%)   | 0/44 (0%)   | 0/12 (0%)  |
| Cannot be determined                                  | 2/44 (5%)   | -           | -          |

**(F) No. data points in each segment in the time series**

|                                                       |             |             |             |
|-------------------------------------------------------|-------------|-------------|-------------|
| Missing information in protocol and/or results report | 7/44 (16%)  | -           | -           |
| Any discrepancy between results report and protocol   | 27/44 (61%) | 20/44 (45%) | 14/20 (70%) |
| Results report details did not match protocol         | 25/44 (57%) | 19/44 (43%) | 14/20 (70%) |
| Results report had fewer details than protocol        | 2/44 (5%)   | 1/44 (2%)   | 0/20 (0%)   |
| Results report had more details than protocol         | 0/44 (0%)   | 0/44 (0%)   | 0/20 (0%)   |
| Cannot be determined                                  | 1/44 (2%)   | -           | -           |

**The ITS model**

**(G) Start and end dates of each segment in the ITS model**

|                                                       |             |             |            |
|-------------------------------------------------------|-------------|-------------|------------|
| Missing information in protocol and/or results report | 22/44 (50%) | -           | -          |
| Any discrepancy between results report and protocol   | 15/44 (34%) | 12/44 (27%) | 7/12 (58%) |
| Results report details did not match protocol         | 13/44 (30%) | 11/44 (25%) | 7/12 (58%) |
| Results report had fewer details than protocol        | 2/44 (5%)   | 1/44 (2%)   | 0/12 (0%)  |
| Results report had more details than protocol         | 0/44 (0%)   | 0/44 (0%)   | 0/12 (0%)  |

| Item                                                                             | Discrepancy (%) | Potentially important discrepancy <sup>a</sup> (%) | Justification not provided for discrepancy (%) |
|----------------------------------------------------------------------------------|-----------------|----------------------------------------------------|------------------------------------------------|
| Cannot be determined                                                             | 2/44 (5%)       | -                                                  | -                                              |
| <b>(H) No. data points in each segment in the ITS model</b>                      |                 |                                                    |                                                |
| Missing information in protocol and/or results report                            | 12/44 (27%)     | -                                                  | -                                              |
| Any discrepancy between results report and protocol                              | 22/44 (50%)     | 17/44 (39%)                                        | 13/17 (76%)                                    |
| Results report details did not match protocol                                    | 20/44 (45%)     | 16/44 (36%)                                        | 13/17 (76%)                                    |
| Results report had fewer details than protocol                                   | 2/44 (5%)       | 1/44 (2%)                                          | 0/17 (0%)                                      |
| Results report had more details than protocol                                    | 0/44 (0%)       | 0/44 (0%)                                          | 0/17 (0%)                                      |
| Cannot be determined                                                             | 2/44 (5%)       | -                                                  | -                                              |
| <b>(I) Time interval(s) at which outcome data was aggregated</b>                 |                 |                                                    |                                                |
| Missing information in protocol and/or results report                            | 6/44 (14%)      | -                                                  | -                                              |
| Any discrepancy between results report and protocol                              | 8/44 (18%)      | 8/44 (18%)                                         | 7/8 (88%)                                      |
| Results report details did not match protocol                                    | 7/44 (16%)      | 7/44 (16%)                                         | 7/8 (88%)                                      |
| Results report had fewer details than protocol                                   | 1/44 (2%)       | 1/44 (2%)                                          | 0/8 (0%)                                       |
| Results report had more details than protocol                                    | 0/44 (0%)       | 0/44 (0%)                                          | 0/8 (0%)                                       |
| Cannot be determined                                                             | 5/44 (11%)      | -                                                  | -                                              |
| <b>(J) How the interruption was modelled</b>                                     |                 |                                                    |                                                |
| Missing information in protocol and/or results report                            | 7/44 (16%)      | -                                                  | -                                              |
| Any discrepancy between results report and protocol                              | 5/44 (11%)      | 3/44 (7%)                                          | 3/3 (100%)                                     |
| Results report details did not match protocol                                    | 3/44 (7%)       | 3/44 (7%)                                          | 3/3 (100%)                                     |
| Results report had fewer details than protocol                                   | 2/44 (5%)       | 0/44 (0%)                                          | 0/3 (0%)                                       |
| Results report had more details than protocol                                    | 0/44 (0%)       | 0/44 (0%)                                          | 0/3 (0%)                                       |
| Cannot be determined                                                             | 3/44 (7%)       | -                                                  | -                                              |
| <b>(K) Which segments were compared to address the primary research question</b> |                 |                                                    |                                                |
| Missing information in protocol and/or results report                            | 6/44 (14%)      | -                                                  | -                                              |
| Any discrepancy between results report and protocol                              | 4/44 (9%)       | 3/44 (7%)                                          | 3/3 (100%)                                     |
| Results report details did not match protocol                                    | 3/44 (7%)       | 3/44 (7%)                                          | 3/3 (100%)                                     |

| Item                                                              | Discrepancy (%) | Potentially important discrepancy <sup>a</sup> (%) | Justification not provided for discrepancy (%) |
|-------------------------------------------------------------------|-----------------|----------------------------------------------------|------------------------------------------------|
| Results report had fewer details than protocol                    | 1/44 (2%)       | 0/44 (0%)                                          | 0/3 (0%)                                       |
| Results report had more details than protocol                     | 0/44 (0%)       | 0/44 (0%)                                          | 0/3 (0%)                                       |
| Cannot be determined                                              | 5/44 (11%)      | -                                                  | -                                              |
| <b>(L) Types of effect measure(s) reported</b>                    |                 |                                                    |                                                |
| Missing information in protocol and/or results report             | 13/44 (30%)     | -                                                  | -                                              |
| Any discrepancy between results report and protocol               | 14/44 (32%)     | 11/44 (25%)                                        | 11/11 (100%)                                   |
| Results report details did not match protocol                     | 8/44 (18%)      | 8/44 (18%)                                         | 8/11 (73%)                                     |
| Results report had fewer details than protocol                    | 5/44 (11%)      | 2/44 (5%)                                          | 2/11 (18%)                                     |
| Results report had more details than protocol                     | 1/44 (2%)       | 1/44 (2%)                                          | 1/11 (9%)                                      |
| Cannot be determined                                              | 3/44 (7%)       | -                                                  | -                                              |
| <b>Statistical analysis methods</b>                               |                 |                                                    |                                                |
| <b>(M) ITS analysis method(s)</b>                                 |                 |                                                    |                                                |
| Missing information in protocol and/or results report             | 14/44 (32%)     | -                                                  | -                                              |
| Any discrepancy between results report and protocol               | 14/44 (32%)     | 10/44 (23%)                                        | 9/10 (90%)                                     |
| Results report details did not match protocol                     | 6/44 (14%)      | 6/44 (14%)                                         | 6/10 (60%)                                     |
| Results report had fewer details than protocol                    | 8/44 (18%)      | 4/44 (9%)                                          | 3/10 (30%)                                     |
| Results report had more details than protocol                     | 0/44 (0%)       | 0/44 (0%)                                          | 0/10 (0%)                                      |
| Cannot be determined                                              | 10/44 (23%)     | -                                                  | -                                              |
| <b>(N) Decision rule on whether to adjust for autocorrelation</b> |                 |                                                    |                                                |
| Missing information in protocol and/or results report             | 34/44 (77%)     | -                                                  | -                                              |
| Any discrepancy between results report and protocol               | 4/44 (9%)       | 2/44 (5%)                                          | 2/2 (100%)                                     |
| Results report details did not match protocol                     | 1/44 (2%)       | 1/44 (2%)                                          | 1/2 (50%)                                      |
| Results report had fewer details than protocol                    | 3/44 (7%)       | 1/44 (2%)                                          | 1/2 (50%)                                      |
| Results report had more details than protocol                     | 0/44 (0%)       | 0/44 (0%)                                          | 0/2 (0%)                                       |
| Cannot be determined                                              | 0/44 (0%)       | -                                                  | -                                              |
| <b>(O) Method(s) of testing for autocorrelation</b>               |                 |                                                    |                                                |

| Item                                                                 | Discrepancy (%)          | Potentially important discrepancy <sup>a</sup> (%) | Justification not provided for discrepancy (%) |
|----------------------------------------------------------------------|--------------------------|----------------------------------------------------|------------------------------------------------|
| Missing information in protocol and/or results report                | 30/36 <sup>d</sup> (83%) | -                                                  | -                                              |
| Any discrepancy between results report and protocol                  | 3/36 (8%)                | 3/36 (8%)                                          | 2/3 (67%)                                      |
| Results report details did not match protocol                        | 1/36 (3%)                | 1/36 (3%)                                          | 1/3 (33%)                                      |
| Results report had fewer details than protocol                       | 2/36 (6%)                | 2/36 (6%)                                          | 1/3 (33%)                                      |
| Results report had more details than protocol                        | 0/36 (0%)                | 0/36 (0%)                                          | 0/3 (0%)                                       |
| Cannot be determined                                                 | 0/36 (0%)                | -                                                  | -                                              |
| <b>(P) Method(s) of adjusting for autocorrelation</b>                |                          |                                                    |                                                |
| Missing information in protocol and/or results report                | 34/44 (77%)              | -                                                  | -                                              |
| Any discrepancy between results report and protocol                  | 2/44 (5%)                | 1/44 (2%)                                          | 1/1 (100%)                                     |
| Results report details did not match protocol                        | 1/44 (2%)                | 1/44 (2%)                                          | 1/1 (100%)                                     |
| Results report had fewer details than protocol                       | 1/44 (2%)                | 0/44 (0%)                                          | 0/1 (0%)                                       |
| Results report had more details than protocol                        | 0/44 (0%)                | 0/44 (0%)                                          | 0/1 (0%)                                       |
| Cannot be determined                                                 | 1/44 (2%)                | -                                                  | -                                              |
| <b>(Q) Method(s) of testing &amp; adjusting for seasonality</b>      |                          |                                                    |                                                |
| Missing information in protocol and/or results report                | 36/44 (82%)              | -                                                  | -                                              |
| Any discrepancy between results report and protocol                  | 5/44 (11%)               | 3/44 (7%)                                          | 3/3 (100%)                                     |
| Results report details did not match protocol                        | 0/44 (0%)                | 0/44 (0%)                                          | 0/3 (0%)                                       |
| Results report had fewer details than protocol                       | 5/44 (11%)               | 3/44 (7%)                                          | 3/3 (100%)                                     |
| Results report had more details than protocol                        | 0/44 (0%)                | 0/44 (0%)                                          | 0/3 (0%)                                       |
| Cannot be determined                                                 | 0/44 (0%)                | -                                                  | -                                              |
| <b>(R) Method(s) of testing &amp; adjusting for non-stationarity</b> |                          |                                                    |                                                |
| Missing information in protocol and/or results report                | 41/44 (93%)              | -                                                  | -                                              |
| Any discrepancy between results report and protocol                  | 0/44 (0%)                | 0/44 (0%)                                          | -                                              |
| Results report details did not match protocol                        | 0/44 (0%)                | 0/44 (0%)                                          | -                                              |
| Results report had fewer details than protocol                       | 0/44 (0%)                | 0/44 (0%)                                          | -                                              |
| Results report had more details than protocol                        | 0/44 (0%)                | 0/44 (0%)                                          | -                                              |
| Cannot be determined                                                 | 0/44 (0%)                | -                                                  | -                                              |

| Item                                                              | Discrepancy (%)         | Potentially important discrepancy <sup>a</sup> (%) | Justification not provided for discrepancy (%) |
|-------------------------------------------------------------------|-------------------------|----------------------------------------------------|------------------------------------------------|
| <b>(S) Presence and type of control series</b>                    |                         |                                                    |                                                |
| Missing information in protocol and/or results report             | 2/44 (5%)               | -                                                  | -                                              |
| Any discrepancy between results report and protocol               | 7/44 (16%)              | 5/44 (11%)                                         | 4/5 (80%)                                      |
| Results report details did not match protocol                     | 5/44 (11%)              | 5/44 (11%)                                         | 4/5 (80%)                                      |
| Results report had fewer details than protocol                    | 2/44 (5%)               | 0/44 (0%)                                          | 0/5 (0%)                                       |
| Results report had more details than protocol                     | 0/44 (0%)               | 0/44 (0%)                                          | 0/5 (0%)                                       |
| Cannot be determined                                              | 1/44 (2%)               | -                                                  | -                                              |
| <b>(T) Method(s) of comparing intervention and control series</b> |                         |                                                    |                                                |
| Missing information in protocol and/or results report             | 9/20 <sup>e</sup> (45%) | -                                                  | -                                              |
| Any discrepancy between results report and protocol               | 3/20 (15%)              | 2/20 (10%)                                         | 1/2 (50%)                                      |
| Results report details did not match protocol                     | 2/20 (10%)              | 2/20 (10%)                                         | 1/2 (50%)                                      |
| Results report had fewer details than protocol                    | 1/20 (5%)               | 0/20 (0%)                                          | 0/2 (0%)                                       |
| Results report had more details than protocol                     | 0/20 (0%)               | 0/20 (0%)                                          | 0/2 (0%)                                       |
| Cannot be determined                                              | 3/20 (15%)              | -                                                  | -                                              |

**Notes:**

<sup>a</sup> Discrepancy had potential to significantly impact the results. See [Additional File S6](#) for examples.

<sup>b</sup> Denominator is the number of studies with important discrepancy between the protocol and the results report.

<sup>c</sup> "Cannot be determined" is applicable to studies that had some information about the item reported in both the protocol and the results report, but the information was either too vague or insufficient to determine whether there was a discrepancy, or what type of discrepancy it was.

<sup>d</sup> For Method(s) of testing for autocorrelation", the denominator only includes studies where the authors said they might test for presence of autocorrelation.

<sup>e</sup> For "Method(s) of comparing intervention and control series", the denominator only includes studies where there was a control series.

Abbreviations: ITS: interrupted time series
